# Supplementary material for: Exploring spin states and ligand field splitting in metal complexes: a theoretical analysis of spin–orbital interactions and magnetic properties
Source: Royal Society of Chemistry journal article supplement (doi:10.1039/d4dt00329b), 2024-01-01
Supplement: d4dt00329b1.pdf [file d4dt00329b1.pdf]

Electronic Supplementary Information (ESI) for Publication

Tomohiko ISHII *et al.*

The list of calculation results of the magnitude of the ligand field splitting ( $\Delta_0$ ) octahedral hexacoordinated metal complex  $ML_6$  used for the one-electron calculation (DV- $X\alpha$  molecular orbital method).

- ※ The label 'C' denotes the number of the valence electrons.
- ※ The central metal in each metal complex is shown with the atomic number 'Z' and the symbol of an element 'M'.
- ※ The metal-ligand coordination distance M-L is the average among 6 M-L distances.

| ML <sub>6</sub>             |    |    |   |          |                |      |        | Ser. | Z  | M  | C | CSD    | Δ <sub>o</sub> | M-L  | Chiral |
|-----------------------------|----|----|---|----------|----------------|------|--------|------|----|----|---|--------|----------------|------|--------|
| Ligand = I <sup>-</sup> ①   |    |    |   |          |                |      |        | 11   | 42 | Mo | 3 | DEBLEB | 2.41           | 2.45 |        |
| Ser.                        | Z  | M  | C | CSD      | Δ <sub>o</sub> | M-L  | Chiral | 11   | 42 | Mo | 3 | PEPCOC | 2.48           | 2.44 |        |
|                             | 40 | Zr | 4 | RIQPEN   | 2.27           | 2.86 |        |      | 42 | Mo | 4 | FIPDEO | 2.93           | 2.35 |        |
| 17                          | 78 | Pt | 4 | PYPHI    | 2.89           | 2.67 |        |      | 42 | Mo | 4 | ZICWOX | 2.82           | 2.38 |        |
| 17                          | 78 | Pt | 4 | KIBMIS   | 2.87           | 2.67 |        |      | 42 | Mo | 4 | FUTPIT | 2.80           | 2.38 |        |
| 17                          | 78 | Pt | 4 | KIBMOY   | 2.91           | 2.66 |        |      | 42 | Mo | 5 | JAWRUU | 3.18           | 2.31 |        |
| Ligand = Br <sup>-</sup> ②  |    |    |   |          |                |      |        |      | 43 | Tc | 4 | CIMFEJ | 2.74           | 2.36 |        |
| 7                           | 24 | Cr | 3 | YIBWOV   | 1.48           | 2.64 |        |      | 43 | Tc | 4 | JEPQOL | 2.77           | 2.35 |        |
|                             | 29 | Cu | 2 | TIVJEN   | 0.96           | 2.52 |        |      | 43 | Tc | 4 | KAXQUW | 2.76           | 2.35 |        |
|                             | 40 | Zr | 3 | SENPOQ   | 2.68           | 2.62 |        |      | 43 | Tc | 4 | LALHAH | 2.74           | 2.36 |        |
|                             | 42 | Mo | 4 | FUYGUB   | 2.73           | 2.53 |        |      | 44 | Ru | 2 | WUGCOQ | 2.26           | 2.37 |        |
| 11                          | 42 | Mo | 3 | DOMTII   | 2.36           | 2.59 |        | 13   | 44 | Ru | 3 | ENIDAG | 2.42           | 2.38 |        |
|                             | 43 | Tc | 5 | PSBRNB   | 3.14           | 2.50 |        | 13   | 44 | Ru | 3 | HEVCOA | 2.43           | 2.37 |        |
| 12                          | 45 | Rh | 3 | HUQMEL   | 2.43           | 2.50 |        | 13   | 44 | Ru | 3 | HOCXUS | 2.42           | 2.38 |        |
| 12                          | 45 | Rh | 3 | ZOKHEM   | 2.51           | 2.53 |        | 13   | 44 | Ru | 3 | TAVTUF | 2.43           | 2.37 |        |
|                             | 73 | Ta | 5 | BDASTA   | 3.50           | 2.49 |        | 13   | 44 | Ru | 3 | YOJBUU | 2.44           | 2.37 |        |
| 16                          | 75 | Re | 4 | AYOMAC   | 3.13           | 2.49 |        |      | 44 | Ru | 4 | GAZNOK | 2.74           | 2.32 |        |
| 17                          | 78 | Pt | 4 | AZELEW   | 3.00           | 2.47 |        |      | 44 | Ru | 4 | YARREP | 2.72           | 2.33 |        |
| Ligand = S <sup>2-</sup> ③  |    |    |   |          |                |      |        | 12   | 45 | Rh | 3 | FEWGET | 2.44           | 2.35 |        |
| Ligand = SCN <sup>-</sup> ④ |    |    |   |          |                |      |        | 12   | 45 | Rh | 3 | RIXHIP | 2.45           | 2.34 |        |
| 12                          | 45 | Rh | 3 | YURKIF   | 2.34           | 2.37 |        | 12   | 45 | Rh | 3 | TIBWIK | 2.43           | 2.35 |        |
| 15                          | 77 | Ir | 3 | PORQAO   | 2.87           | 2.38 |        | 12   | 45 | Rh | 3 | XISFEL | 2.46           | 2.35 |        |
| 17                          | 78 | Pt | 4 | BULVAF   | 2.39           | 2.68 |        | 14   | 46 | Pd | 4 | JIZLOT | 2.55           | 2.31 |        |
| 17                          | 78 | Pt | 4 | EMUVOX   | 2.87           | 2.39 |        | 14   | 46 | Pd | 4 | LAHFUV | 2.10           | 2.42 |        |
| 17                          | 78 | Pt | 4 | XECZAG   | 2.24           | 2.38 |        |      | 72 | Hf | 4 | BARWIB | 3.11           | 2.45 |        |
| Ligand = Cl <sup>-</sup> ⑤  |    |    |   |          |                |      |        |      | 72 | Hf | 4 | FEBHIE | 3.13           | 2.44 |        |
|                             | 22 | Ti | 4 | BARMAJ   | 2.08           | 2.34 |        |      | 72 | Hf | 4 | JESFOC | 3.09           | 2.45 |        |
|                             | 22 | Ti | 4 | FEPHOX   | 2.08           | 2.34 |        |      | 73 | Ta | 5 | EMUCOE | 3.51           | 2.34 |        |
|                             | 23 | V  | 4 | SAHJER   | 2.03           | 2.31 |        |      | 73 | Ta | 5 | FIKGAH | 3.59           | 2.33 |        |
| 8                           | 23 | V  | 3 | YUDFUY   | 1.65           | 2.39 |        |      | 74 | W  | 3 | LEXSIR | 2.20           | 2.58 |        |
| 7                           | 24 | Cr | 3 | FAMVUK10 | 1.61           | 2.36 |        |      | 74 | W  | 4 | EGUKIB | 3.31           | 2.34 |        |
| 1                           | 25 | Mn | 2 | DEFWOB   | 0.86           | 2.57 |        |      | 74 | W  | 4 | HUYDIO | 3.24           | 2.36 |        |
| 1                           | 25 | Mn | 2 | LIDQUL   | 0.83           | 2.58 |        |      | 74 | W  | 4 | JAKBEC | 3.10           | 2.38 |        |
| 4                           | 26 | Fe | 2 | MAFECL   | 1.15           | 2.39 |        |      | 74 | W  | 5 | BUCBAC | 3.48           | 2.30 |        |
| 6                           | 26 | Fe | 3 | DALLIL   | 1.38           | 2.38 |        |      | 74 | W  | 5 | JATFIT | 3.50           | 2.30 |        |
| 6                           | 26 | Fe | 3 | KAPLOD   | 1.35           | 2.40 |        | 16   | 75 | Re | 4 | AYOLUV | 3.10           | 2.36 |        |
| 6                           | 26 | Fe | 3 | PIMXIS   | 1.38           | 2.39 |        | 16   | 75 | Re | 4 | AYOMEG | 3.10           | 2.36 |        |
| 6                           | 26 | Fe | 3 | TOQDAE   | 1.35           | 2.40 |        | 16   | 75 | Re | 4 | HIDGIK | 3.12           | 2.35 |        |
| 3                           | 27 | Co | 2 | HOCQUL   | 0.94           | 2.47 |        | 16   | 75 | Re | 4 | IWOZID | 3.06           | 2.36 |        |
| 2                           | 28 | Ni | 2 | ZALNIJ   | 0.98           | 2.45 |        |      | 76 | Os | 4 | CEXRIG | 3.10           | 2.33 |        |
|                             | 29 | Cu | 2 | FOWCUP   | 0.93           | 2.51 |        |      | 76 | Os | 4 | ENIDUA | 3.06           | 2.34 |        |
|                             | 29 | Cu | 2 | GOKWUY   | 0.93           | 2.50 |        |      | 76 | Os | 4 | GEBLUU | 3.09           | 2.33 |        |
|                             | 29 | Cu | 2 | POCJAS   | 0.99           | 2.47 |        |      | 76 | Os | 5 | CEXREC | 3.37           | 2.28 |        |
|                             | 39 | Y  | 3 | WAPJUT   | 2.44           | 2.62 |        |      | 77 | Ir | 4 | GALQAL | 3.01           | 2.66 |        |
|                             | 40 | Zr | 4 | TUCNIO   | 2.86           | 2.47 |        |      | 77 | Ir | 4 | MIRKEE | 3.01           | 2.33 |        |
|                             | 40 | Zr | 4 | FOHREZ   | 2.86           | 2.47 |        |      | 77 | Ir | 4 | NAYQOU | 3.05           | 2.32 |        |
|                             | 40 | Zr | 4 | JAVKEW   | 2.88           | 2.46 |        |      | 77 | Ir | 4 | RIHFAP | 3.03           | 2.32 |        |
|                             | 41 | Nb | 4 | KEWHOJ   | 2.88           | 2.41 |        |      | 77 | Ir | 4 | TEVFIJ | 3.02           | 2.33 |        |
|                             | 41 | Nb | 5 | FIRMOJ   | 3.25           | 2.34 |        | 17   | 78 | Pt | 4 | AKCLPT | 2.91           | 2.32 |        |
|                             | 41 | Nb | 5 | NUYFOC   | 3.26           | 2.34 |        | 17   | 78 | Pt | 4 | BIBRIN | 2.85           | 2.33 |        |
|                             | 41 | Nb | 5 | GOLJEW   | 3.24           | 2.34 |        | 17   | 78 | Pt | 4 | MIMDPT | 2.90           | 2.32 |        |
|                             |    |    |   |          |                |      |        | 17   | 78 | Pt | 4 | MINLAW | 2.88           | 2.32 |        |

| Ser.                     | Z  | M  | C | CSD      | $\Delta_0$ | M-L  | Chiral   | Ligand = $N_3^-$ ⑥ |    |    |   |          |            |      |          |
|--------------------------|----|----|---|----------|------------|------|----------|--------------------|----|----|---|----------|------------|------|----------|
|                          | 22 | Ti | 4 | BEYNUP   | 1.54       | 2.02 |          | Ser.               | Z  | M  | C | CSD      | $\Delta_0$ | M-L  | Chiral   |
| Ligand = $F^-$ ⑦         |    |    |   |          |            |      |          | Ligand = $H_2O$ ⑩  |    |    |   |          |            |      |          |
|                          | 21 | Sc | 3 | DEONAC   | 2.15       | 2.03 |          | 13                 | 44 | Ru | 3 | OLABAE   | 3.49       | 2.03 | $\Delta$ |
|                          | 21 | Sc | 3 | HEYRUZ   | 2.20       | 2.05 |          | 12                 | 45 | Rh | 3 | CAZCIP   | 3.49       | 2.02 | $\Delta$ |
|                          | 22 | Ti | 4 | AHUNEW   | 3.08       | 1.84 |          | 12                 | 45 | Rh | 3 | LIKRIH   | 3.36       | 2.01 | $\Delta$ |
|                          | 22 | Ti | 4 | KOYXOL   | 3.06       | 1.86 |          | 12                 | 45 | Rh | 3 | SOZFIW   | 3.38       | 2.01 | $\Delta$ |
|                          | 22 | Ti | 4 | LORCEA   | 3.16       | 1.84 |          |                    | 21 | Sc | 3 | CEMXXAU  | 1.99       | 2.09 |          |
|                          | 22 | Ti | 4 | SIXXAY   | 3.82       | 1.76 |          |                    | 22 | Ti | 3 | LIMPUS   | 2.23       | 2.03 |          |
| 8                        | 23 | V  | 3 | LIDYUT   | 2.00       | 1.97 |          | 5                  | 23 | V  | 2 | VEPSUE   | 1.64       | 2.12 |          |
| 8                        | 23 | V  | 3 | WOHDIG   | 2.49       | 1.90 |          | 5                  | 23 | V  | 2 | YEGSAF   | 2.52       | 1.96 |          |
| 7                        | 24 | Cr | 3 | ADOSOC   | 2.13       | 1.90 |          | 8                  | 23 | V  | 3 | COLNUM   | 2.18       | 2.00 |          |
| 7                        | 24 | Cr | 3 | GAWBUC   | 2.17       | 1.90 |          | 8                  | 23 | V  | 3 | FEMHOV   | 2.24       | 1.99 |          |
| 6                        | 26 | Fe | 3 | FULHOJ   | 1.79       | 1.90 |          |                    | 24 | Cr | 2 | GIMZIM   | 1.66       | 2.04 |          |
|                          | 40 | Zr | 4 | TIZXAC   | 4.11       | 2.01 |          | 7                  | 24 | Cr | 3 | UCOME    | 2.17       | 1.97 |          |
|                          | 40 | Zr | 4 | KOJVAG   | 4.28       | 2.01 |          | 7                  | 24 | Cr | 3 | IWOJOT   | 2.27       | 1.97 |          |
|                          | 40 | Zr | 4 | QOFCOE   | 4.18       | 2.01 |          | 7                  | 24 | Cr | 3 | MEWZET01 | 2.11       | 1.96 |          |
|                          | 41 | Nb | 4 | ROZLOI   | 4.44       | 1.93 |          | 7                  | 24 | Cr | 3 | TAPBUH   | 2.15       | 1.96 |          |
|                          | 42 | Mo | 4 | ROZLIC   | 4.38       | 1.92 |          | 1                  | 25 | Mn | 2 | ASOVEJ   | 1.08       | 2.16 |          |
|                          | 72 | Hf | 4 | RENPAB   | 4.71       | 1.99 |          | 1                  | 25 | Mn | 2 | COLWUV   | 1.06       | 2.19 |          |
|                          | 73 | Ta | 4 | CEYCEO   | 5.93       | 1.86 |          | 1                  | 25 | Mn | 2 | HEHSIW   | 1.08       | 2.17 |          |
|                          | 73 | Ta | 5 | ECANAY   | 5.72       | 1.87 |          | 1                  | 25 | Mn | 2 | LEFYAX   | 1.09       | 2.17 |          |
|                          | 73 | Ta | 5 | GUCCEN   | 5.43       | 1.89 |          | 1                  | 25 | Mn | 2 | VIDGIZ   | 1.22       | 2.17 |          |
|                          | 74 | W  | 4 | ZIYWAF   | 6.86       | 1.78 |          |                    | 25 | Mn | 3 | GUKGAV   | 1.33       | 2.16 |          |
|                          | 74 | W  | 5 | ZOLKEQ   | 6.56       | 1.78 |          | 4                  | 26 | Fe | 2 | AMITAR   | 1.43       | 2.05 |          |
|                          | 76 | Os | 4 | UFEPEA   | 4.19       | 1.93 |          | 4                  | 26 | Fe | 2 | DIJRUK   | 1.19       | 2.10 |          |
|                          | 77 | Ir | 4 | TMAPTF01 | 3.72       | 1.92 |          | 4                  | 26 | Fe | 2 | EJATEO   | 1.22       | 2.10 |          |
| Ligand = $S_2O_3^{2-}$ ⑧ |    |    |   |          |            |      |          | 4                  | 26 | Fe | 2 | FEACIT   | 1.04       | 2.12 |          |
| Ligand = $OCOR^-$ ⑨      |    |    |   |          |            |      |          | 4                  | 26 | Fe | 2 | NATGEV   | 1.15       | 2.11 |          |
| Ligand = $OCO_2^{2-}$ ⑩  |    |    |   |          |            |      |          | 4                  | 26 | Fe | 2 | QEDCOR   | 1.12       | 2.10 |          |
| Ligand = $OH^-$ ⑪        |    |    |   |          |            |      |          | 4                  | 26 | Fe | 2 | ZILZID   | 1.32       | 2.12 |          |
| Ligand = $OCHO^-$ ⑫      |    |    |   |          |            |      |          | 6                  | 26 | Fe | 3 | MEWZAP   | 1.71       | 2.00 |          |
| 7                        | 24 | Cr | 3 | GICNEL   | 2.35       | 1.98 |          | 6                  | 26 | Fe | 3 | XIGSEL   | 1.71       | 1.99 |          |
| 11                       | 42 | Mo | 3 | GICNAH   | 3.59       | 2.11 |          | 3                  | 27 | Co | 2 | ASUDIB   | 1.18       | 2.10 |          |
| Ligand = $OSO_3^{2-}$ ⑬  |    |    |   |          |            |      |          | 3                  | 27 | Co | 2 | BAVYOM   | 1.36       | 2.08 |          |
| Ligand = $ONO_2^-$ ⑭     |    |    |   |          |            |      |          | 3                  | 27 | Co | 2 | NESFIB   | 1.17       | 2.09 |          |
| Ligand = $ox^{2-}$ ⑮     |    |    |   |          |            |      |          | 3                  | 27 | Co | 2 | SUVBUG   | 1.16       | 2.07 |          |
| 8                        | 23 | V  | 3 | KOXLTV01 | 2.30       | 2.01 | $\Delta$ | 3                  | 27 | Co | 2 | WABLIU10 | 1.12       | 2.07 |          |
| 7                        | 24 | Cr | 3 | CROXKH   | 2.52       | 1.97 | $\Delta$ | 9                  | 27 | Co | 3 | ASAWOH   | 1.97       | 1.98 |          |
| 7                        | 24 | Cr | 3 | DITFER   | 2.60       | 1.96 | $\Delta$ | 2                  | 28 | Ni | 2 | JERNID   | 1.19       | 2.04 |          |
| 7                        | 24 | Cr | 3 | FEPPOS   | 2.52       | 1.97 | $\Delta$ | 2                  | 28 | Ni | 2 | LUMVAQ   | 1.26       | 2.05 |          |
| 7                        | 24 | Cr | 3 | GUKGID   | 2.58       | 1.97 | $\Delta$ | 2                  | 28 | Ni | 2 | MAPHER   | 1.25       | 2.05 |          |
| 7                        | 24 | Cr | 3 | RUPGEP   | 2.44       | 1.97 | $\Delta$ | 2                  | 28 | Ni | 2 | SIYZEF   | 1.11       | 2.06 |          |
|                          | 25 | Mn | 3 | ZZZCCG10 | 2.05       | 2.00 | $\Delta$ | 2                  | 28 | Ni | 2 | VELQJ    | 1.21       | 2.07 |          |
| 4                        | 26 | Fe | 2 | LIPXIS   | 1.83       | 2.00 | $\Delta$ |                    | 29 | Cu | 2 | DILCIL   | 1.20       | 2.10 |          |
| 6                        | 26 | Fe | 3 | BEMPEO   | 1.91       | 2.00 | $\Delta$ |                    | 29 | Cu | 2 | DODDOP   | 1.26       | 2.12 |          |
| 6                        | 26 | Fe | 3 | ARABEA   | 1.78       | 2.00 | $\Delta$ |                    | 29 | Cu | 2 | KAGNEM   | 1.26       | 2.11 |          |
| 6                        | 26 | Fe | 3 | GEXQOP   | 1.82       | 2.01 | $\Delta$ |                    | 29 | Cu | 2 | SIYZIJ   | 1.16       | 2.11 |          |
| 9                        | 27 | Co | 3 | PNIOCO   | 2.26       | 1.92 | $\Delta$ |                    | 30 | Zn | 2 | BENBIG   | 1.96       | 2.07 |          |
| 9                        | 27 | Co | 3 | DAZVUV   | 2.48       | 1.90 | $\Delta$ |                    | 30 | Zn | 2 | CITDAK   | 2.84       | 2.07 |          |
| 9                        | 27 | Co | 3 | GUKGEZ   | 2.42       | 1.89 | $\Delta$ |                    | 30 | Zn | 2 | FOGWUU   | 1.58       | 2.09 |          |
|                          | 43 | Tc | 4 | FOPBAN   | 4.00       | 1.99 | $\Delta$ |                    | 30 | Zn | 2 | KAMPEU   | 2.62       | 2.09 |          |
| 13                       | 44 | Ru | 3 | DUKNOM   | 3.58       | 2.03 | $\Delta$ |                    | 44 | Ru | 2 | BONPEZ   | 2.39       | 2.12 |          |
| 13                       | 44 | Ru | 3 | IDECOK   | 3.43       | 2.04 | $\Delta$ |                    | 44 | Ru | 2 | OLUXAU   | 2.86       | 2.09 |          |
|                          |    |    |   |          |            |      |          | 13                 | 44 | Ru | 3 | BONPID   | 3.08       | 2.03 |          |

| Ser.                          | Z  | M  | C | CSD      | $\Delta_o$ | M-L  | Chiral | Ser.           | Z  | M  | C | CSD      | $\Delta_o$ | M-L  | Chiral |
|-------------------------------|----|----|---|----------|------------|------|--------|----------------|----|----|---|----------|------------|------|--------|
| Ligand = NCS <sup>-</sup> ⑰   |    |    |   |          |            |      |        | 3              | 27 | Co | 2 | CAFWEM   | 2.51       | 1.87 |        |
|                               | 21 | Sc | 3 | BUQMOP   | 2.95       | 2.18 |        | 3              | 27 | Co | 2 | OKOCAS   | 2.57       | 1.96 |        |
|                               | 21 | Sc | 3 | XAJMOK   | 2.90       | 2.16 |        | 3              | 27 | Co | 2 | RAJNIZ   | 1.48       | 2.17 |        |
| 7                             | 24 | Cr | 3 | GETMUO   | 2.20       | 2.00 |        | 9              | 27 | Co | 3 | CANYAS   | 2.88       | 1.97 |        |
| 7                             | 24 | Cr | 3 | LUHWAM   | 2.71       | 1.99 |        | 9              | 27 | Co | 3 | EYAQEA   | 2.95       | 1.96 |        |
| 7                             | 24 | Cr | 3 | KADXAP   | 2.68       | 2.01 |        | 9              | 27 | Co | 3 | XEDNAV   | 3.13       | 1.97 |        |
| 7                             | 24 | Cr | 3 | NICHOC10 | 2.43       | 2.00 |        | 2              | 28 | Ni | 2 | BICSIQ   | 1.68       | 2.14 |        |
| 1                             | 25 | Mn | 2 | GEGBOK   | 1.19       | 2.23 |        | 2              | 28 | Ni | 2 | NUHJUV   | 1.69       | 2.14 |        |
| 1                             | 25 | Mn | 2 | XILJIM   | 1.38       | 2.24 |        | 12             | 45 | Rh | 3 | XEDNEZ   | 4.60       | 2.08 |        |
|                               | 25 | Mn | 4 | MUPSOF   | 1.20       | 2.22 |        | 15             | 77 | Ir | 3 | XEDNID   | 5.12       | 2.09 |        |
| 6                             | 26 | Fe | 3 | MIJMUN   | 1.54       | 2.09 |        | Ligand = en ⑳  |    |    |   |          |            |      |        |
| 6                             | 26 | Fe | 3 | NEPSAC   | 1.75       | 2.06 |        | 5              | 23 | V  | 2 | HIDMEM   | 2.10       | 2.20 | Δ      |
| 6                             | 26 | Fe | 3 | TMFETC   | 1.82       | 2.05 |        | 7              | 24 | Cr | 3 | CRENTC   | 2.75       | 2.08 | Δ      |
| 3                             | 27 | Co | 2 | BUQMIJ01 | 1.43       | 2.09 |        | 7              | 24 | Cr | 3 | ENDACR   | 2.82       | 2.08 | Δ      |
| 3                             | 27 | Co | 2 | KIPYUD   | 1.36       | 2.12 |        | 7              | 24 | Cr | 3 | ETDHCO   | 2.95       | 2.08 | Δ      |
| 2                             | 28 | Ni | 2 | TIGGEW   | 1.25       | 2.09 |        | 7              | 24 | Cr | 3 | GOZCIH   | 2.87       | 2.08 | Δ      |
| 2                             | 28 | Ni | 2 | BEZXIN   | 1.40       | 2.10 |        | 1              | 25 | Mn | 2 | ASEBEF   | 1.32       | 2.29 | Δ      |
| 2                             | 28 | Ni | 2 | TOWCAJ   | 1.37       | 2.09 |        | 1              | 25 | Mn | 2 | KIBFUX   | 1.48       | 2.27 | Δ      |
|                               | 39 | Y  | 3 | KAKQES   | 3.22       | 2.33 |        | 1              | 25 | Mn | 2 | QIBZOR   | 1.44       | 2.27 | Δ      |
| 11                            | 42 | Mo | 3 | KMOITC   | 4.15       | 2.08 |        | 1              | 25 | Mn | 2 | RAGTOI   | 1.38       | 2.28 | Δ      |
|                               | 43 | Tc | 4 | FEKWEX   | 4.39       | 2.00 |        | 4              | 26 | Fe | 2 | FEBMAB   | 1.50       | 2.20 | Δ      |
| 16                            | 75 | Re | 4 | OGAKIR   | 5.10       | 2.05 |        | 4              | 26 | Fe | 2 | LIWKOR01 | 1.59       | 2.21 | Δ      |
| 16                            | 75 | Re | 4 | XUCBON   | 4.76       | 1.98 |        | 4              | 26 | Fe | 2 | RITKUA   | 1.51       | 2.22 | Δ      |
|                               | 76 | Os | 3 | QIJJEY   | 4.36       | 2.02 |        | 3              | 27 | Co | 2 | HIQYUC   | 1.25       | 2.28 | Δ      |
|                               | 76 | Os | 4 | QIJJAU   | 4.40       | 2.01 |        | 3              | 27 | Co | 2 | HOSPOV   | 1.57       | 2.18 | Δ      |
| Ligand = ONO <sup>-</sup> ㉑   |    |    |   |          |            |      |        | 3              | 27 | Co | 2 | ICETEQ   | 1.65       | 2.18 | Δ      |
| Ligand = CH <sub>3</sub> CN ㉒ |    |    |   |          |            |      |        | 3              | 27 | Co | 2 | JEQNEZ   | 1.64       | 2.17 | Δ      |
| 5                             | 23 | V  | 2 | BEQQIX   | 2.10       | 2.11 |        | 3              | 27 | Co | 2 | KIBGAE   | 1.64       | 2.17 | Δ      |
| 7                             | 24 | Cr | 3 | ACALEW   | 2.00       | 2.00 |        | 9              | 27 | Co | 3 | ABIXIT   | 3.08       | 1.97 | Δ      |
| 1                             | 25 | Mn | 2 | ZOTYAI   | 2.17       | 2.21 |        | 9              | 27 | Co | 3 | FIRQIH   | 3.06       | 1.97 | Δ      |
| 4                             | 26 | Fe | 2 | ACEYOW   | 2.15       | 2.15 |        | 9              | 27 | Co | 3 | PERHIE   | 3.11       | 1.97 | Δ      |
| 4                             | 26 | Fe | 2 | HIRTIL   | 2.17       | 2.16 |        | 9              | 27 | Co | 3 | TENCON   | 3.22       | 1.97 | Δ      |
| 4                             | 26 | Fe | 2 | HMCIFE15 | 2.16       | 2.16 |        | 9              | 27 | Co | 3 | WOQFAK   | 3.09       | 1.97 | Δ      |
| 3                             | 27 | Co | 2 | OCELIS   | 2.11       | 2.11 |        | 2              | 28 | Ni | 2 | BINYAY   | 1.81       | 2.13 | Δ      |
| 3                             | 27 | Co | 2 | JOYPUI   | 2.10       | 2.11 |        | 2              | 28 | Ni | 2 | DASSUL   | 1.72       | 2.15 | Δ      |
| 3                             | 27 | Co | 2 | OFINAT   | 2.10       | 2.11 |        | 2              | 28 | Ni | 2 | EFATOV   | 1.84       | 2.13 | Δ      |
| 2                             | 28 | Ni | 2 | FUJVAH   | 2.08       | 2.08 |        | 2              | 28 | Ni | 2 | ENIACH   | 1.81       | 2.13 | Δ      |
| 2                             | 28 | Ni | 2 | XUGBIK   | 2.07       | 2.07 |        | 2              | 28 | Ni | 2 | XAPNOS   | 1.85       | 2.13 | Δ      |
| 2                             | 28 | Ni | 2 | OCELAK   | 2.06       | 2.07 |        |                | 44 | Ru | 2 | BABRAX   | 3.84       | 2.13 | Δ      |
|                               | 43 | Tc | 2 | TEQNAE   | 4.62       | 2.06 |        | 12             | 45 | Rh | 3 | AGUJIW   | 4.49       | 2.09 | Δ      |
|                               | 44 | Ru | 2 | ACEYAI   | 4.54       | 2.09 |        | 12             | 45 | Rh | 3 | CRHENC   | 4.68       | 2.06 | Δ      |
|                               | 44 | Ru | 2 | PUHSOB   | 4.56       | 2.03 |        | 12             | 45 | Rh | 3 | DARGUY   | 4.66       | 2.07 | Δ      |
|                               | 44 | Ru | 2 | FEWRII   | 4.87       | 2.01 |        | 12             | 45 | Rh | 3 | TENRHC   | 4.65       | 2.06 | Δ      |
| 12                            | 45 | Rh | 3 | VENYAO   | 4.44       | 1.99 |        |                | 76 | Os | 3 | FISFAO   | 5.25       | 2.11 | Δ      |
| Ligand = py ㉓                 |    |    |   |          |            |      |        | 15             | 77 | Ir | 3 | UBEFEM   | 5.12       | 2.10 | Δ      |
| 4                             | 26 | Fe | 2 | PYFEFE   | 1.46       | 2.26 |        | 15             | 77 | Ir | 3 | DARHAF   | 5.36       | 2.20 | Δ      |
|                               | 44 | Ru | 2 | HPYRUB   | 4.31       | 2.13 |        | Ligand = bpy ㉔ |    |    |   |          |            |      |        |
| Ligand = NH <sub>3</sub> ㉕    |    |    |   |          |            |      |        |                | 24 | Cr | 2 | ACAYUZ   | 3.00       | 2.08 | Δ      |
| 1                             | 25 | Mn | 2 | PUHJIL   | 1.33       | 2.29 |        | 7              | 24 | Cr | 3 | FERYEG   | 3.14       | 2.04 | Δ      |

| Ser.                                                 | Z  | M  | C | CSD      | $\Delta_0$ | M-L  | Chiral   | Ser.                      | Z  | M  | C | CSD      | $\Delta_0$ | M-L  | Chiral   |
|------------------------------------------------------|----|----|---|----------|------------|------|----------|---------------------------|----|----|---|----------|------------|------|----------|
| 1                                                    | 25 | Mn | 2 | GUXJOY   | 1.73       | 2.24 | $\Delta$ |                           |    |    |   |          |            |      |          |
| 4                                                    | 26 | Fe | 2 | LIPXIS   | 3.11       | 1.98 | $\Delta$ | 6                         | 26 | Fe | 3 | KAHKIN   | 4.22       | 2.02 |          |
| 3                                                    | 27 | Co | 2 | CAMHED   | 1.91       | 2.13 | $\Delta$ | 6                         | 26 | Fe | 3 | BIWYOW   | 4.56       | 1.93 |          |
| 3                                                    | 27 | Co | 2 | CIBDOH   | 2.04       | 2.12 | $\Delta$ | 4                         | 26 | Fe | 2 | FETGIV   | 4.66       | 1.94 |          |
| 3                                                    | 27 | Co | 2 | IXODII   | 3.33       | 1.93 | $\Delta$ | 4                         | 26 | Fe | 2 | CEJYEV   | 4.87       | 1.95 |          |
| 9                                                    | 27 | Co | 3 | DUPPAG   | 3.25       | 1.93 | $\Delta$ | 4                         | 26 | Fe | 2 | EYIQUY   | 5.05       | 1.91 |          |
| 9                                                    | 27 | Co | 3 | FIXKUT   | 3.26       | 1.93 | $\Delta$ | 4                         | 26 | Fe | 2 | FAWNOH   | 4.87       | 1.93 |          |
| 2                                                    | 28 | Ni | 2 | AGADAO   | 2.19       | 2.09 | $\Delta$ | 4                         | 26 | Fe | 2 | GIJVEA   | 5.04       | 1.90 |          |
|                                                      | 28 | Ni | 3 | CUHVUW   | 2.94       | 1.98 | $\Delta$ | 9                         | 27 | Co | 3 | AENCOC   | 5.02       | 1.88 |          |
|                                                      | 44 | Ru | 2 | AXAFIO   | 4.89       | 2.05 | $\Delta$ | 9                         | 27 | Co | 3 | DIENCO   | 4.93       | 1.89 |          |
| 12                                                   | 45 | Rh | 3 | DIWGIZ   | 4.64       | 2.04 | $\Delta$ | 9                         | 27 | Co | 3 | HIGZAY   | 4.86       | 1.90 |          |
| 12                                                   | 45 | Rh | 3 | FERYIK   | 4.74       | 2.04 | $\Delta$ | 9                         | 27 | Co | 3 | PEHACO   | 4.77       | 1.90 |          |
|                                                      | 76 | Os | 2 | HIRDOB   | 5.20       | 2.06 | $\Delta$ |                           | 42 | Mo | 4 | HITPOQ   | 6.80       | 2.90 |          |
| 15                                                   | 77 | Ir | 3 | CEZMAV   | 5.46       | 2.02 | $\Delta$ |                           | 44 | Ru | 2 | QEZYAV   | 6.76       | 2.03 |          |
| Ligand = phen <sup>24</sup>                          |    |    |   |          |            |      |          |                           | 44 | Ru | 2 | WUGSEW   | 6.99       | 2.03 |          |
| 8                                                    | 23 | V  | 3 | CEHBEX   | 3.92       | 1.99 | $\Delta$ | 13                        | 44 | Ru | 3 | KAGLAG   | 6.60       | 2.05 |          |
| 7                                                    | 24 | Cr | 3 | LIYWUL   | 3.15       | 2.05 | $\Delta$ |                           | 76 | Os | 3 | OCIJIU   | 7.06       | 2.06 |          |
| 1                                                    | 25 | Mn | 2 | GUHGOF   | 1.87       | 2.23 | $\Delta$ | 17                        | 78 | Pt | 4 | YASNUC   | 6.76       | 2.02 |          |
| 1                                                    | 25 | Mn | 2 | LUHKAA   | 1.50       | 2.25 | $\Delta$ | 17                        | 78 | Pt | 4 | COZVAO   | 6.81       | 1.99 |          |
| 4                                                    | 26 | Fe | 2 | ADETIM   | 3.13       | 1.97 | $\Delta$ | Ligand = CO <sup>29</sup> |    |    |   |          |            |      |          |
| 4                                                    | 26 | Fe | 2 | AFIRAJ   | 3.11       | 1.98 | $\Delta$ | 4                         | 26 | Fe | 2 | CEHHON   | 4.94       | 1.91 |          |
| 4                                                    | 26 | Fe | 2 | MIKJEW   | 3.10       | 1.98 | $\Delta$ | 4                         | 26 | Fe | 2 | HOLMIE   | 4.93       | 1.91 |          |
| 6                                                    | 26 | Fe | 3 | BIPGEN   | 3.09       | 1.98 | $\Delta$ | 4                         | 26 | Fe | 2 | HOLMOK   | 4.95       | 1.91 |          |
| 6                                                    | 26 | Fe | 3 | FUTDOO   | 3.09       | 1.97 | $\Delta$ |                           | 44 | Ru | 2 | LARPAW   | 6.82       | 2.02 |          |
| 6                                                    | 26 | Fe | 3 | SOGXOC   | 3.19       | 1.97 | $\Delta$ |                           | 44 | Ru | 2 | LARPIE   | 6.59       | 2.04 |          |
| 3                                                    | 27 | Co | 2 | AGOYIF   | 1.94       | 2.13 | $\Delta$ |                           | 76 | Os | 2 | CEHHIH   | 8.25       | 2.00 |          |
| 3                                                    | 27 | Co | 2 | BUYLIR   | 3.17       | 1.94 | $\Delta$ |                           | 76 | Os | 2 | LARPEA   | 7.96       | 2.02 |          |
| 3                                                    | 27 | Co | 2 | HOCFIP   | 3.19       | 1.94 | $\Delta$ |                           | 76 | Os | 2 | LARPOK   | 7.89       | 2.03 |          |
| 3                                                    | 27 | Co | 2 | SALVEH   | 1.93       | 2.13 | $\Delta$ | 15                        | 77 | Ir | 3 | XOLYIG   | 7.26       | 2.03 |          |
| 9                                                    | 27 | Co | 3 | KIWRIS   | 3.08       | 1.94 | $\Delta$ | Ligand = glycine          |    |    |   |          |            |      |          |
| 9                                                    | 27 | Co | 3 | KULRAL   | 3.06       | 1.94 | $\Delta$ | 8                         | 23 | V  | 3 | AGASIL   | 2.62       | 2.05 | $\Delta$ |
| 9                                                    | 27 | Co | 3 | MOHFAR   | 2.99       | 1.94 | $\Delta$ | 7                         | 24 | Cr | 3 | TGLYCR   | 2.51       | 2.02 | $\Delta$ |
| 2                                                    | 28 | Ni | 2 | FUHWEL   | 2.09       | 2.09 | $\Delta$ | 9                         | 27 | Co | 3 | AVUWET   | 2.60       | 1.93 | $\Delta$ |
| 2                                                    | 28 | Ni | 2 | MODCAK   | 2.07       | 2.09 | $\Delta$ | 9                         | 27 | Co | 3 | SEZMEQ   | 2.73       | 1.92 | $\Delta$ |
| 2                                                    | 28 | Ni | 2 | IYULIX   | 2.07       | 2.09 | $\Delta$ | Ligand = urea             |    |    |   |          |            |      |          |
| Ligand = SO <sub>3</sub> <sup>2-</sup> <sup>25</sup> |    |    |   |          |            |      |          |                           | 22 | Ti | 3 | TIUREA01 | 2.80       | 2.01 |          |
| Ligand = NO <sub>2</sub> <sup>-</sup> <sup>26</sup>  |    |    |   |          |            |      |          | 7                         | 24 | Cr | 3 | DAPFEF   | 2.13       | 1.97 |          |
| 9                                                    | 27 | Co | 3 | WERKIN10 | 3.58       | 1.96 |          | 7                         | 24 | Cr | 3 | COLHIU   | 2.24       | 1.97 |          |
| 12                                                   | 45 | Rh | 3 | TEDDOV   | 5.83       | 2.03 |          | 7                         | 24 | Cr | 3 | HOHPOJ   | 2.14       | 1.97 |          |
| Ligand = PPh <sub>3</sub> <sup>27</sup>              |    |    |   |          |            |      |          | 7                         | 24 | Cr | 3 | HOHPUP   | 2.02       | 1.97 |          |
| Ligand = CN <sup>-</sup> <sup>28</sup>               |    |    |   |          |            |      |          | 1                         | 25 | Mn | 2 | WITQAR   | 1.05       | 2.18 |          |
|                                                      | 22 | Ti | 3 | NAYWOZ   | 3.85       | 2.18 |          |                           | 25 | Mn | 3 | BOPWEI   | 1.93       | 1.99 |          |
| 8                                                    | 23 | V  | 3 | JEHBAA   | 3.72       | 2.14 |          | 4                         | 26 | Fe | 2 | WITQEV   | 1.56       | 1.99 |          |
| 7                                                    | 24 | Cr | 3 | BIJZOK   | 3.86       | 2.07 |          | 6                         | 26 | Fe | 3 | MANJIU   | 1.77       | 1.99 |          |
| 7                                                    | 24 | Cr | 3 | AFOVIA   | 3.99       | 2.08 |          | 3                         | 27 | Co | 2 | COLLAQ01 | 1.21       | 2.11 |          |
| 7                                                    | 24 | Cr | 3 | COLHIU   | 4.03       | 2.08 |          | 3                         | 27 | Co | 2 | RUBLEG   | 1.24       | 2.10 |          |
| 7                                                    | 24 | Cr | 3 | ELONUO   | 4.00       | 2.08 |          | 3                         | 27 | Co | 2 | WITLIU   | 1.19       | 2.09 |          |
|                                                      | 25 | Mn | 3 | BIFZOG   | 4.33       | 2.01 |          | 2                         | 28 | Ni | 2 | ADUFEK   | 1.33       | 2.06 |          |



| Ligand = I <sup>-</sup> ①    |    |    |   |          |      |
|------------------------------|----|----|---|----------|------|
| Ser.                         | Z  | M  | C | CSD      | GS   |
| 17                           | 78 | Pt | 4 | KIBMIS   | low  |
| Ligand = Br <sup>-</sup> ②   |    |    |   |          |      |
| 7                            | 24 | Cr | 3 | YIBWVOV  | high |
| 11                           | 42 | Mo | 3 | DOMTII   | low  |
| 12                           | 45 | Rh | 3 | HUQMEL   | low  |
| 16                           | 75 | Re | 4 | AYOMAC   | low  |
| 17                           | 78 | Pt | 4 | AZELEW   | low  |
| Ligand = SCN <sup>-</sup> ④  |    |    |   |          |      |
| 12                           | 45 | Rh | 3 | YURKIF   | low  |
| 15                           | 77 | Ir | 3 | PORQAO   | low  |
| 17                           | 78 | Pt | 4 | BULVAF   | low  |
| Ligand = Cl <sup>-</sup> ⑤   |    |    |   |          |      |
| 8                            | 23 | V  | 3 | YUDFUY   | low  |
| 7                            | 24 | Cr | 3 | FAMVUK10 | high |
| 1                            | 25 | Mn | 2 | DEFWOB   | high |
| 4                            | 26 | Fe | 2 | MAFECL   | low  |
| 6                            | 26 | Fe | 3 | DALLIL   | low  |
| 6                            | 26 | Fe | 3 | KAPLOD   | low  |
| 3                            | 27 | Co | 2 | HOCQUL   | low  |
| 2                            | 28 | Ni | 2 | ZALNIJ   | high |
| 11                           | 42 | Mo | 3 | DEBLEB   | low  |
| 13                           | 44 | Ru | 3 | TAVTUF   | low  |
| 12                           | 45 | Rh | 3 | FEWGET   | low  |
| 14                           | 46 | Pd | 4 | JIZLOT   | low  |
| 14                           | 46 | Pd | 4 | LAHFUV   | low  |
| 16                           | 75 | Re | 4 | AYOLUV   | low  |
| 17                           | 78 | Pt | 4 | MIMDPT   | low  |
| Ligand = F <sup>-</sup> ⑦    |    |    |   |          |      |
| 8                            | 23 | V  | 3 | LIDYUT   | low  |
| 8                            | 23 | V  | 3 | WOHDIG   | low  |
| 7                            | 24 | Cr | 3 | ADOSOC   | high |
| 6                            | 26 | Fe | 3 | FULHOJ   | low  |
| Ligand = OCHO <sup>-</sup> ⑩ |    |    |   |          |      |
| 7                            | 24 | Cr | 3 | GICNEL   | low  |
| 11                           | 42 | Mo | 3 | GICNAH   | low  |
| Ligand = ox <sup>2-</sup> ⑮  |    |    |   |          |      |
| 8                            | 23 | V  | 3 | KOXLTV01 | low  |
| 7                            | 24 | Cr | 3 | FEPDOS   | high |
| 4                            | 26 | Fe | 2 | LIPXIS   | low  |
| 6                            | 26 | Fe | 3 | GEXQOP   | low  |
| 9                            | 27 | Co | 3 | DAZVUV   | low  |
| 13                           | 44 | Ru | 3 | DUKNOM   | low  |
| 12                           | 45 | Rh | 3 | CAZCIP   | low  |
| Ligand = H <sub>2</sub> O ⑯  |    |    |   |          |      |
| 5                            | 23 | V  | 2 | VEPSUE   | high |
| 8                            | 23 | V  | 3 | FEMHOV   | low  |
| 7                            | 24 | Cr | 3 | MEWZET01 | high |
| 1                            | 25 | Mn | 2 | ASOVEJ   | high |
| 4                            | 26 | Fe | 2 | FEACIT   | high |
| 6                            | 26 | Fe | 3 | MEWZAP   | high |
| 3                            | 27 | Co | 2 | SUVBUG   | high |
| 9                            | 27 | Co | 3 | ASAWOH   | high |

| Ser.                          | Z  | M  | C | CSD      | GS   |
|-------------------------------|----|----|---|----------|------|
| 2                             | 28 | Ni | 2 | JERNID   | high |
| 13                            | 44 | Ru | 3 | BONPID   | high |
| Ligand = NCS <sup>-</sup> ⑰   |    |    |   |          |      |
| 7                             | 24 | Cr | 3 | LUHWAM   | low  |
| 1                             | 25 | Mn | 2 | XILJIM   | low  |
| 6                             | 26 | Fe | 3 | NEPSAC   | low  |
| 3                             | 27 | Co | 2 | KIPYUD   | low  |
| 2                             | 28 | Ni | 2 | TOWCAJ   | low  |
| 11                            | 42 | Mo | 3 | KMOITC   | low  |
| 16                            | 75 | Re | 4 | OGAKIR   | low  |
| Ligand = CH <sub>3</sub> CN ⑱ |    |    |   |          |      |
| 5                             | 23 | V  | 2 | BEQQIX   | low  |
| 7                             | 24 | Cr | 3 | ACALEW   | low  |
| 1                             | 25 | Mn | 2 | ZOTYAI   | low  |
| 4                             | 26 | Fe | 2 | HMCIFE15 | low  |
| 3                             | 27 | Co | 2 | OCELIS   | low  |
| 2                             | 28 | Ni | 2 | FUJVAH   | low  |
| 12                            | 45 | Rh | 3 | VENYAO   | low  |
| Ligand = py ⑳                 |    |    |   |          |      |
| 4                             | 26 | Fe | 2 | PYFEFE   | low  |
| Ligand = NH <sub>3</sub> ㉑    |    |    |   |          |      |
| 7                             | 24 | Cr | 3 | LEBRUF   | high |
| 1                             | 25 | Mn | 2 | PUHJIL   | high |
| 3                             | 27 | Co | 2 | CAFWEM   | high |
| 3                             | 27 | Co | 2 | RAJNIZ   | high |
| 9                             | 27 | Co | 3 | EYAQEA   | low  |
| 2                             | 28 | Ni | 2 | BICSIQ   | low  |
| 12                            | 45 | Rh | 3 | XEDNEZ   | low  |
| 15                            | 77 | Ir | 3 | XEDNID   | low  |
| Ligand = en ㉒                 |    |    |   |          |      |
| 5                             | 23 | V  | 2 | HIDMEM   | high |
| 7                             | 24 | Cr | 3 | ENDACR   | high |
| 1                             | 25 | Mn | 2 | ASEBEF   | low  |
| 1                             | 25 | Mn | 2 | RAGTOI   | low  |
| 4                             | 26 | Fe | 2 | FEBMAB   | low  |
| 3                             | 27 | Co | 2 | HIQYUC   | low  |
| 9                             | 27 | Co | 3 | PERHIE   | low  |
| 2                             | 28 | Ni | 2 | EFATOV   | low  |
| 12                            | 45 | Rh | 3 | CRHENC   | low  |
| 15                            | 77 | Ir | 3 | UBEFEM   | low  |
| Ligand = bpy ㉓                |    |    |   |          |      |
| 7                             | 24 | Cr | 3 | FERYEG   | low  |
| 1                             | 25 | Mn | 2 | GUXJOY   | low  |
| 4                             | 26 | Fe | 2 | LIPXIS   | low  |
| 3                             | 27 | Co | 2 | CIBDOH   | low  |
| 3                             | 27 | Co | 2 | IXODII   | low  |
| 9                             | 27 | Co | 3 | DUPPAG   | low  |
| 2                             | 28 | Ni | 2 | AGADAO   | low  |
| 12                            | 45 | Rh | 3 | FERYIK   | low  |
| 15                            | 77 | Ir | 3 | CEZMAV   | low  |
| Ligand = phen ㉔               |    |    |   |          |      |
| 8                             | 23 | V  | 3 | CEHBEX   | low  |
| 7                             | 24 | Cr | 3 | LIYWUL   | low  |

|                                         | Z  | M  | C | CSD    | GS  |
|-----------------------------------------|----|----|---|--------|-----|
| 1                                       | 25 | Mn | 2 | LUHKAA | low |
| 4                                       | 26 | Fe | 2 | ADETIM | low |
| 6                                       | 26 | Fe | 3 | BIPGEN | low |
| 3                                       | 27 | Co | 2 | AGOYIF | low |
| 9                                       | 27 | Co | 3 | MOHFAR | low |
| 2                                       | 28 | Ni | 2 | FUHWEL | low |
| Ligand = NO <sub>2</sub> <sup>-</sup> ⑳ |    |    |   |        |     |
| 12                                      | 45 | Rh | 3 | TEDDOV | low |
| Ligand = CN <sup>-</sup> ㉘              |    |    |   |        |     |
| 8                                       | 23 | V  | 3 | JEHBAA | low |
| 7                                       | 24 | Cr | 3 | COLHIU | low |
| 6                                       | 26 | Fe | 3 | BIWYOW | low |
| 4                                       | 26 | Fe | 2 | CEJYEV | low |
| 9                                       | 27 | Co | 3 | DIENCO | low |
| 13                                      | 44 | Ru | 3 | KAGLAG | low |
| 17                                      | 78 | Pt | 4 | YASNUC | low |
| Ligand = CO ㉙                           |    |    |   |        |     |
| 4                                       | 26 | Fe | 2 | HOLMIE | low |
| 15                                      | 77 | Ir | 3 | XOLYIG | low |



| Metal Series No. | Metal | Valence | Metal Atomic No. | Ligand Series No. | Ligand             | Ligand Field Splitting $\Delta$ (eV) | Metal Ligand Distance M-L (Å) | Chirality (bidentate ligand) | CSD Reference Code |
|------------------|-------|---------|------------------|-------------------|--------------------|--------------------------------------|-------------------------------|------------------------------|--------------------|
| 1                | Mn    | 2+      | 25               | 5                 | Cl <sup>-</sup>    | 0.86                                 | 2.57                          |                              | DEFWOB             |
| 1                | Mn    | 2+      | 25               | 5                 | Cl <sup>-</sup>    | 0.83                                 | 2.58                          |                              | LIDQUL             |
| 1                | Mn    | 2+      | 25               | 16                | H <sub>2</sub> O   | 1.08                                 | 2.16                          |                              | ASOVEJ             |
| 1                | Mn    | 2+      | 25               | 16                | H <sub>2</sub> O   | 1.06                                 | 2.19                          |                              | COLWUV             |
| 1                | Mn    | 2+      | 25               | 16                | H <sub>2</sub> O   | 1.08                                 | 2.17                          |                              | HEHSIW             |
| 1                | Mn    | 2+      | 25               | 16                | H <sub>2</sub> O   | 1.09                                 | 2.17                          |                              | LEFYAX             |
| 1                | Mn    | 2+      | 25               | 16                | H <sub>2</sub> O   | 1.22                                 | 2.17                          |                              | VIDGIZ             |
| 1                | Mn    | 2+      | 25               | 17                | NCS <sup>-</sup>   | 1.19                                 | 2.23                          |                              | GEGBOK             |
| 1                | Mn    | 2+      | 25               | 17                | NCS <sup>-</sup>   | 1.38                                 | 2.24                          |                              | XILJIM             |
| 1                | Mn    | 2+      | 25               | 19                | CH <sub>3</sub> CN | 2.21                                 | 2.22                          |                              | ZOTYAI             |
| 1                | Mn    | 2+      | 25               | 19                | CH <sub>3</sub> CN | 2.12                                 | 2.19                          |                              | ZOTYAI2            |
| 1                | Mn    | 2+      | 25               | 21                | NH <sub>3</sub>    | 1.33                                 | 2.29                          |                              | PUHJIL             |
| 1                | Mn    | 2+      | 25               | 22                | en                 | 1.32                                 | 2.29                          | $\Delta$                     | ASEBEF             |
| 1                | Mn    | 2+      | 25               | 22                | en                 | 1.48                                 | 2.27                          | $\Delta$                     | KIBFUX             |
| 1                | Mn    | 2+      | 25               | 22                | en                 | 1.44                                 | 2.27                          | $\Delta$                     | QIBZOR             |
| 1                | Mn    | 2+      | 25               | 22                | en                 | 1.38                                 | 2.28                          | $\Delta$                     | RAGTOI             |
| 1                | Mn    | 2+      | 25               | 23                | bpy                | 1.73                                 | 2.24                          | $\Delta$                     | GUXJOY             |
| 1                | Mn    | 2+      | 25               | 24                | phen               | 1.87                                 | 2.23                          | $\Delta$                     | GUHGOF             |
| 1                | Mn    | 2+      | 25               | 24                | phen               | 1.50                                 | 2.25                          | $\Delta$                     | LUHKAA             |
| 1                | Mn    | 2+      | 25               |                   | urea               | 1.05                                 | 2.18                          |                              | WITQAR             |
| 2                | Ni    | 2+      | 28               | 5                 | Cl <sup>-</sup>    | 0.98                                 | 2.45                          |                              | ZALNIJ             |
| 2                | Ni    | 2+      | 28               | 16                | H <sub>2</sub> O   | 1.19                                 | 2.04                          |                              | JERNID             |
| 2                | Ni    | 2+      | 28               | 16                | H <sub>2</sub> O   | 1.26                                 | 2.05                          |                              | LUMVAQ             |
| 2                | Ni    | 2+      | 28               | 16                | H <sub>2</sub> O   | 1.25                                 | 2.05                          |                              | MAPHER             |
| 2                | Ni    | 2+      | 28               | 16                | H <sub>2</sub> O   | 1.11                                 | 2.06                          |                              | SIYZEF             |
| 2                | Ni    | 2+      | 28               | 16                | H <sub>2</sub> O   | 1.21                                 | 2.07                          |                              | VELQEJ             |
| 2                | Ni    | 2+      | 28               | 17                | NCS <sup>-</sup>   | 1.25                                 | 2.09                          |                              | TIGGEW             |
| 2                | Ni    | 2+      | 28               | 17                | NCS <sup>-</sup>   | 1.40                                 | 2.10                          |                              | BEZXIN             |
| 2                | Ni    | 2+      | 28               | 17                | NCS <sup>-</sup>   | 1.37                                 | 2.09                          |                              | TOWCAJ             |
| 2                | Ni    | 2+      | 28               | 19                | CH <sub>3</sub> CN | 2.08                                 | 2.08                          |                              | FUJVAH             |
| 2                | Ni    | 2+      | 28               | 19                | CH <sub>3</sub> CN | 2.07                                 | 2.07                          |                              | XUGBIK             |
| 2                | Ni    | 2+      | 28               | 19                | CH <sub>3</sub> CN | 2.06                                 | 2.07                          |                              | OCELAK             |
| 2                | Ni    | 2+      | 28               | 21                | NH <sub>3</sub>    | 1.68                                 | 2.14                          |                              | BICSIQ             |
| 2                | Ni    | 2+      | 28               | 21                | NH <sub>3</sub>    | 1.69                                 | 2.14                          |                              | NUHJUV             |
| 2                | Ni    | 2+      | 28               | 22                | en                 | 1.81                                 | 2.13                          | $\Delta$                     | BINYAY             |
| 2                | Ni    | 2+      | 28               | 22                | en                 | 1.72                                 | 2.15                          | $\Delta$                     | DASSUL             |
| 2                | Ni    | 2+      | 28               | 22                | en                 | 1.84                                 | 2.13                          | $\Delta$                     | EFATOV             |
| 2                | Ni    | 2+      | 28               | 22                | en                 | 1.81                                 | 2.13                          | $\Delta$                     | ENIACH             |
| 2                | Ni    | 2+      | 28               | 22                | en                 | 1.85                                 | 2.13                          | $\Delta$                     | XAPNOS             |
| 2                | Ni    | 2+      | 28               | 23                | bpy                | 2.12                                 | 2.09                          | $\Delta$                     | AGADAO             |
| 2                | Ni    | 2+      | 28               | 23                | bpy                | 2.26                                 | 2.08                          | $\Delta$                     | AGADAO2            |
| 2                | Ni    | 2+      | 28               | 24                | phen               | 2.09                                 | 2.09                          | $\Delta$                     | FUHWEL             |
| 2                | Ni    | 2+      | 28               | 24                | phen               | 2.07                                 | 2.09                          | $\Delta$                     | MODCAK             |
| 2                | Ni    | 2+      | 28               | 24                | phen               | 2.07                                 | 2.09                          | $\Delta$                     | IYULIX             |
| 2                | Ni    | 2+      | 28               |                   | urea               | 1.33                                 | 2.06                          |                              | ADUFEK             |
| 3                | Co    | 2+      | 27               | 5                 | Cl <sup>-</sup>    | 0.94                                 | 2.47                          |                              | HOCQUL             |
| 3                | Co    | 2+      | 27               | 16                | H <sub>2</sub> O   | 1.18                                 | 2.10                          |                              | ASUDIB             |
| 3                | Co    | 2+      | 27               | 16                | H <sub>2</sub> O   | 1.36                                 | 2.08                          |                              | BAVYOM             |
| 3                | Co    | 2+      | 27               | 16                | H <sub>2</sub> O   | 1.17                                 | 2.09                          |                              | NESFIB             |
| 3                | Co    | 2+      | 27               | 16                | H <sub>2</sub> O   | 1.16                                 | 2.07                          |                              | SUVBUG             |
| 3                | Co    | 2+      | 27               | 16                | H <sub>2</sub> O   | 1.12                                 | 2.07                          |                              | WABLIU10           |
| 3                | Co    | 2+      | 27               | 17                | NCS <sup>-</sup>   | 1.43                                 | 2.09                          |                              | BUQMIJ01           |
| 3                | Co    | 2+      | 27               | 17                | NCS <sup>-</sup>   | 1.36                                 | 2.12                          |                              | KIPYUD             |
| 3                | Co    | 2+      | 27               | 19                | CH <sub>3</sub> CN | 2.11                                 | 2.11                          |                              | OCELIS             |

|   |    |    |    |    |       |      |      |   |          |
|---|----|----|----|----|-------|------|------|---|----------|
| 3 | Co | 2+ | 27 | 19 | CH3CN | 2.10 | 2.11 |   | JOYPUI   |
| 3 | Co | 2+ | 27 | 19 | CH3CN | 2.10 | 2.11 |   | OFINAT   |
| 3 | Co | 2+ | 27 | 21 | NH3   | 2.51 | 1.87 |   | CAFWEM   |
| 3 | Co | 2+ | 27 | 21 | NH3   | 2.57 | 1.96 |   | OKOCAS   |
| 3 | Co | 2+ | 27 | 21 | NH3   | 1.48 | 2.17 |   | RAJNIZ   |
| 3 | Co | 2+ | 27 | 22 | en    | 1.25 | 2.28 | Δ | HIQYUC   |
| 3 | Co | 2+ | 27 | 22 | en    | 1.57 | 2.18 | Λ | HOSPOV   |
| 3 | Co | 2+ | 27 | 22 | en    | 1.65 | 2.18 | Λ | ICETEQ   |
| 3 | Co | 2+ | 27 | 22 | en    | 1.64 | 2.17 | Λ | JEQNEZ   |
| 3 | Co | 2+ | 27 | 22 | en    | 1.64 | 2.17 | Λ | KIBGAE   |
| 3 | Co | 2+ | 27 | 23 | bpy   | 1.91 | 2.13 | Δ | CAMHED   |
| 3 | Co | 2+ | 27 | 23 | bpy   | 2.04 | 2.12 | Λ | CIBDOH   |
| 3 | Co | 2+ | 27 | 23 | bpy   | 3.28 | 1.93 | Λ | IXODII   |
| 3 | Co | 2+ | 27 | 23 | bpy   | 3.38 | 1.93 | Δ | IXODII2  |
| 3 | Co | 2+ | 27 | 24 | phen  | 1.94 | 2.13 | Λ | AGOYIF   |
| 3 | Co | 2+ | 27 | 24 | phen  | 3.17 | 1.94 | Δ | BUYLIR   |
| 3 | Co | 2+ | 27 | 24 | phen  | 3.19 | 1.94 | Λ | HOCFIP   |
| 3 | Co | 2+ | 27 | 24 | phen  | 1.93 | 2.13 | Δ | SALVEH   |
| 3 | Co | 2+ | 27 |    | urea  | 1.21 | 2.11 |   | COLLAQ01 |
| 3 | Co | 2+ | 27 |    | urea  | 1.24 | 2.10 |   | RUBLEG   |
| 3 | Co | 2+ | 27 |    | urea  | 1.19 | 2.09 |   | WITLIU   |
| 4 | Fe | 2+ | 26 | 5  | Cl-   | 1.15 | 2.39 |   | MAFECL   |
| 4 | Fe | 2+ | 26 | 15 | ox2-  | 1.83 | 2.00 | Δ | LIPXIS   |
| 4 | Fe | 2+ | 26 | 16 | H2O   | 1.43 | 2.05 |   | AMITAR   |
| 4 | Fe | 2+ | 26 | 16 | H2O   | 1.19 | 2.10 |   | DIJRUK   |
| 4 | Fe | 2+ | 26 | 16 | H2O   | 1.22 | 2.10 |   | EJATEO   |
| 4 | Fe | 2+ | 26 | 16 | H2O   | 1.04 | 2.12 |   | FEACIT   |
| 4 | Fe | 2+ | 26 | 16 | H2O   | 1.15 | 2.11 |   | NATGEV   |
| 4 | Fe | 2+ | 26 | 16 | H2O   | 1.12 | 2.10 |   | QEDCOR   |
| 4 | Fe | 2+ | 26 | 16 | H2O   | 1.32 | 2.12 |   | ZILZID   |
| 4 | Fe | 2+ | 26 | 19 | CH3CN | 2.15 | 2.15 |   | ACEYOW   |
| 4 | Fe | 2+ | 26 | 19 | CH3CN | 2.17 | 2.16 |   | HIRTIL   |
| 4 | Fe | 2+ | 26 | 19 | CH3CN | 2.16 | 2.16 |   | HMCIFE15 |
| 4 | Fe | 2+ | 26 | 20 | py    | 1.46 | 2.26 |   | PYFEFE   |
| 4 | Fe | 2+ | 26 | 22 | en    | 1.50 | 2.20 | Λ | FEBMAB   |
| 4 | Fe | 2+ | 26 | 22 | en    | 1.59 | 2.21 | Δ | LIWKOR01 |
| 4 | Fe | 2+ | 26 | 22 | en    | 1.51 | 2.22 | Λ | RITKUA   |
| 4 | Fe | 2+ | 26 | 23 | bpy   | 3.10 | 1.98 | Δ | LIPXIS   |
| 4 | Fe | 2+ | 26 | 23 | bpy   | 3.12 | 1.98 | Δ | LIPXIS2  |
| 4 | Fe | 2+ | 26 | 24 | phen  | 3.13 | 1.97 | Λ | ADETIM   |
| 4 | Fe | 2+ | 26 | 24 | phen  | 3.11 | 1.98 | Λ | AFIRAJ   |
| 4 | Fe | 2+ | 26 | 24 | phen  | 3.10 | 1.98 | Λ | MIKJEW   |
| 4 | Fe | 2+ | 26 | 28 | CN-   | 4.87 | 1.95 |   | CEJYEV   |
| 4 | Fe | 2+ | 26 | 28 | CN-   | 5.05 | 1.91 |   | EYIQUY   |
| 4 | Fe | 2+ | 26 | 28 | CN-   | 4.87 | 1.93 |   | FAWNOH   |
| 4 | Fe | 2+ | 26 | 28 | CN-   | 5.04 | 1.90 |   | GIJVEA   |
| 4 | Fe | 2+ | 26 | 29 | CO    | 4.94 | 1.91 |   | CEHHON   |
| 4 | Fe | 2+ | 26 | 29 | CO    | 4.93 | 1.91 |   | HOLMIE   |
| 4 | Fe | 2+ | 26 | 29 | CO    | 4.95 | 1.91 |   | HOLMOK   |
| 4 | Fe | 2+ | 26 |    | urea  | 1.56 | 1.99 |   | WITQEV   |
| 5 | V  | 2+ | 23 | 16 | H2O   | 1.64 | 2.12 |   | VEPSUE   |
| 5 | V  | 2+ | 23 | 16 | H2O   | 2.52 | 1.96 |   | YEGSAF   |
| 5 | V  | 2+ | 23 | 19 | CH3CN | 2.10 | 2.11 |   | BEQQIX   |
| 5 | V  | 2+ | 23 | 22 | en    | 2.10 | 2.20 | Δ | HIDMEM   |
| 6 | Fe | 3+ | 26 | 5  | Cl-   | 1.38 | 2.38 |   | DALLIL   |
| 6 | Fe | 3+ | 26 | 5  | Cl-   | 1.35 | 2.40 |   | KAPLOD   |
| 6 | Fe | 3+ | 26 | 5  | Cl-   | 1.38 | 2.39 |   | PIMXIS   |
| 6 | Fe | 3+ | 26 | 5  | Cl-   | 1.35 | 2.40 |   | TOQDAE   |
| 6 | Fe | 3+ | 26 | 7  | F-    | 1.79 | 1.90 |   | FULHOJ   |

|   |    |    |    |    |         |      |      |   |          |
|---|----|----|----|----|---------|------|------|---|----------|
| 6 | Fe | 3+ | 26 | 15 | ox2-    | 1.91 | 2.00 | Δ | BEMPEO   |
| 6 | Fe | 3+ | 26 | 15 | ox2-    | 1.78 | 2.00 | Δ | ARABEA   |
| 6 | Fe | 3+ | 26 | 15 | ox2-    | 1.82 | 2.01 | Λ | GEXQOP   |
| 6 | Fe | 3+ | 26 | 16 | H2O     | 1.71 | 2.00 |   | MEWZAP   |
| 6 | Fe | 3+ | 26 | 16 | H2O     | 1.71 | 1.99 |   | XIGSEL   |
| 6 | Fe | 3+ | 26 | 17 | NCS-    | 1.54 | 2.09 |   | MIJMUN   |
| 6 | Fe | 3+ | 26 | 17 | NCS-    | 1.75 | 2.06 |   | NEPSAC   |
| 6 | Fe | 3+ | 26 | 17 | NCS-    | 1.85 | 2.05 |   | TMFETC   |
| 6 | Fe | 3+ | 26 | 17 | NCS-    | 1.79 | 2.05 |   | TMFETC2  |
| 6 | Fe | 3+ | 26 | 24 | phen    | 3.09 | 1.98 | Δ | BIPGEN   |
| 6 | Fe | 3+ | 26 | 24 | phen    | 3.09 | 1.97 | Λ | FUTDOO   |
| 6 | Fe | 3+ | 26 | 24 | phen    | 3.19 | 1.97 | Λ | SOGXOC   |
| 6 | Fe | 3+ | 26 | 28 | CN-     | 4.56 | 1.93 |   | BIWYOW   |
| 6 | Fe | 3+ | 26 | 28 | CN-     | 4.66 | 1.94 |   | FETGIV   |
| 6 | Fe | 3+ | 26 |    | urea    | 1.77 | 1.99 |   | MANJIU   |
| 7 | Cr | 3+ | 24 | 2  | Br-     | 1.48 | 2.64 |   | YIBWOV   |
| 7 | Cr | 3+ | 24 | 5  | Cl-     | 1.61 | 2.36 |   | FAMVUK10 |
| 7 | Cr | 3+ | 24 | 7  | F-      | 2.13 | 1.90 |   | ADOSOC   |
| 7 | Cr | 3+ | 24 | 7  | F-      | 2.17 | 1.90 |   | GAWBUC   |
| 7 | Cr | 3+ | 24 | 12 | OCHO-   | 2.35 | 1.98 |   | GICNEL   |
| 7 | Cr | 3+ | 24 | 15 | ox2-    | 2.52 | 1.97 | Λ | CROXKH   |
| 7 | Cr | 3+ | 24 | 15 | ox2-    | 2.60 | 1.96 | Λ | DITFER   |
| 7 | Cr | 3+ | 24 | 15 | ox2-    | 2.52 | 1.97 | Δ | FEPCOS   |
| 7 | Cr | 3+ | 24 | 15 | ox2-    | 2.58 | 1.97 | Λ | GUKGID   |
| 7 | Cr | 3+ | 24 | 15 | ox2-    | 2.44 | 1.97 | Δ | RUPGEP   |
| 7 | Cr | 3+ | 24 | 16 | H2O     | 2.17 | 1.97 |   | UCOMEE   |
| 7 | Cr | 3+ | 24 | 16 | H2O     | 2.27 | 1.97 |   | IWOJOT   |
| 7 | Cr | 3+ | 24 | 16 | H2O     | 2.11 | 1.96 |   | MEWZET01 |
| 7 | Cr | 3+ | 24 | 16 | H2O     | 2.15 | 1.96 |   | TAPBUH   |
| 7 | Cr | 3+ | 24 | 17 | NCS-    | 2.20 | 2.00 |   | GETMUO   |
| 7 | Cr | 3+ | 24 | 17 | NCS-    | 2.71 | 1.99 |   | LUHWAM   |
| 7 | Cr | 3+ | 24 | 17 | NCS-    | 2.68 | 2.01 |   | KADXAP   |
| 7 | Cr | 3+ | 24 | 17 | NCS-    | 2.43 | 2.00 |   | NICHOC10 |
| 7 | Cr | 3+ | 24 | 19 | CH3CN   | 2.00 | 2.00 |   | ACALEW   |
| 7 | Cr | 3+ | 24 | 21 | NH3     | 2.81 | 2.08 |   | LEBRUF   |
| 7 | Cr | 3+ | 24 | 22 | en      | 2.75 | 2.08 | Λ | CRENTC   |
| 7 | Cr | 3+ | 24 | 22 | en      | 2.82 | 2.08 | Δ | ENDACR   |
| 7 | Cr | 3+ | 24 | 22 | en      | 2.95 | 2.08 | Λ | ETDHCO   |
| 7 | Cr | 3+ | 24 | 22 | en      | 2.87 | 2.08 | Δ | GOZCIH   |
| 7 | Cr | 3+ | 24 | 23 | bpy     | 3.14 | 2.04 | Δ | FERYEG   |
| 7 | Cr | 3+ | 24 | 23 | bpy     | 3.18 | 2.05 | Λ | FERYEG2  |
| 7 | Cr | 3+ | 24 | 24 | phen    | 3.15 | 2.05 | Λ | LIYWUL   |
| 7 | Cr | 3+ | 24 | 28 | CN-     | 3.86 | 2.07 |   | BIJZOK   |
| 7 | Cr | 3+ | 24 | 28 | CN-     | 3.99 | 2.08 |   | AFOVIA   |
| 7 | Cr | 3+ | 24 | 28 | CN-     | 4.03 | 2.08 |   | COLHIU   |
| 7 | Cr | 3+ | 24 | 28 | CN-     | 4.00 | 2.08 |   | ELONUO   |
| 7 | Cr | 3+ | 24 |    | glycine | 2.51 | 2.02 | Λ | TGLYCR   |
| 7 | Cr | 3+ | 24 |    | urea    | 2.13 | 1.97 |   | DAPFEF   |
| 7 | Cr | 3+ | 24 |    | urea    | 2.24 | 1.97 |   | COLHIU   |
| 7 | Cr | 3+ | 24 |    | urea    | 2.14 | 1.97 |   | HOHPOJ   |
| 7 | Cr | 3+ | 24 |    | urea    | 2.02 | 1.97 |   | HOHPUP   |
| 8 | V  | 3+ | 23 | 5  | Cl-     | 1.66 | 2.39 |   | YUDFUY   |
| 8 | V  | 3+ | 23 | 5  | Cl-     | 1.64 | 2.39 |   | YUDFUY2  |
| 8 | V  | 3+ | 23 | 7  | F-      | 2.00 | 1.97 |   | LIDYUT   |
| 8 | V  | 3+ | 23 | 7  | F-      | 2.49 | 1.90 |   | WOHDIG   |
| 8 | V  | 3+ | 23 | 15 | ox2-    | 2.30 | 2.01 | Δ | KOXLTV01 |
| 8 | V  | 3+ | 23 | 16 | H2O     | 2.18 | 2.00 |   | COLNUM   |
| 8 | V  | 3+ | 23 | 16 | H2O     | 2.24 | 1.99 |   | FEMHOV   |

|    |    |    |    |    |         |      |      |   |          |
|----|----|----|----|----|---------|------|------|---|----------|
| 8  | V  | 3+ | 23 | 24 | phen    | 3.92 | 1.99 | Λ | CEHBEX   |
| 8  | V  | 3+ | 23 | 28 | CN-     | 3.72 | 2.14 |   | JEHBAA   |
| 8  | V  | 3+ | 23 |    | glycine | 2.62 | 2.05 | Δ | AGASIL   |
| 9  | Co | 3+ | 27 | 15 | ox2-    | 2.26 | 1.92 | Λ | PNIOCO   |
| 9  | Co | 3+ | 27 | 15 | ox2-    | 2.48 | 1.90 | Δ | DAZVUV   |
| 9  | Co | 3+ | 27 | 15 | ox2-    | 2.42 | 1.89 | Λ | GUKGEZ   |
| 9  | Co | 3+ | 27 | 16 | H2O     | 1.97 | 1.98 |   | ASAWOH   |
| 9  | Co | 3+ | 27 | 21 | NH3     | 2.88 | 1.97 |   | CANYAS   |
| 9  | Co | 3+ | 27 | 21 | NH3     | 2.95 | 1.96 |   | EYAQEA   |
| 9  | Co | 3+ | 27 | 21 | NH3     | 3.13 | 1.97 |   | XEDNAV   |
| 9  | Co | 3+ | 27 | 22 | en      | 3.08 | 1.97 | Λ | ABIXIT   |
| 9  | Co | 3+ | 27 | 22 | en      | 3.06 | 1.97 | Λ | FIRQIH   |
| 9  | Co | 3+ | 27 | 22 | en      | 3.11 | 1.97 | Δ | PERHIE   |
| 9  | Co | 3+ | 27 | 22 | en      | 3.22 | 1.97 | Λ | TENCON   |
| 9  | Co | 3+ | 27 | 22 | en      | 3.09 | 1.97 | Λ | WOQFAK   |
| 9  | Co | 3+ | 27 | 23 | bpy     | 3.25 | 1.93 | Δ | DUPPAG   |
| 9  | Co | 3+ | 27 | 23 | bpy     | 3.26 | 1.93 | Λ | FIXKUT   |
| 9  | Co | 3+ | 27 | 24 | phen    | 3.08 | 1.94 | Δ | KIWRIS   |
| 9  | Co | 3+ | 27 | 24 | phen    | 3.06 | 1.94 | Λ | KULRAL   |
| 9  | Co | 3+ | 27 | 24 | phen    | 2.99 | 1.94 | Δ | MOHFAR   |
| 9  | Co | 3+ | 27 | 26 | NO2-    | 3.62 | 1.96 |   | WERKIN2  |
| 9  | Co | 3+ | 27 | 26 | NO2-    | 3.58 | 1.96 |   | WERKIN10 |
| 9  | Co | 3+ | 27 | 28 | CN-     | 5.02 | 1.88 |   | AENCOC   |
| 9  | Co | 3+ | 27 | 28 | CN-     | 4.93 | 1.89 |   | DIENCO   |
| 9  | Co | 3+ | 27 | 28 | CN-     | 4.86 | 1.90 |   | HIGZAY   |
| 9  | Co | 3+ | 27 | 28 | CN-     | 4.77 | 1.90 |   | PEHACO   |
| 9  | Co | 3+ | 27 |    | glycine | 2.60 | 1.93 | Λ | AVUWET   |
| 9  | Co | 3+ | 27 |    | glycine | 2.73 | 1.92 | Δ | SEZMEQ   |
| 11 | Mo | 3+ | 42 | 2  | Br-     | 2.36 | 2.59 |   | DOMTII   |
| 11 | Mo | 3+ | 42 | 5  | Cl-     | 2.41 | 2.45 |   | DEBLEB   |
| 11 | Mo | 3+ | 42 | 5  | Cl-     | 2.48 | 2.44 |   | PEPCOC   |
| 11 | Mo | 3+ | 42 | 12 | OCHO-   | 3.59 | 2.11 |   | GICNAH   |
| 11 | Mo | 3+ | 42 | 17 | NCS-    | 4.15 | 2.08 |   | KMOITC   |
| 12 | Rh | 3+ | 45 | 2  | Br-     | 2.43 | 2.50 |   | HUQMEL   |
| 12 | Rh | 3+ | 45 | 2  | Br-     | 2.51 | 2.53 |   | ZOKHEM   |
| 12 | Rh | 3+ | 45 | 4  | SCN-    | 2.34 | 2.37 |   | YURKIF   |
| 12 | Rh | 3+ | 45 | 5  | Cl-     | 2.44 | 2.35 |   | FEWGET   |
| 12 | Rh | 3+ | 45 | 5  | Cl-     | 2.45 | 2.34 |   | RIXHIP   |
| 12 | Rh | 3+ | 45 | 5  | Cl-     | 2.43 | 2.35 |   | TIBWIK   |
| 12 | Rh | 3+ | 45 | 5  | Cl-     | 2.46 | 2.35 |   | XISFEL   |
| 12 | Rh | 3+ | 45 | 15 | ox2-    | 3.49 | 2.02 | Λ | CAZCIP   |
| 12 | Rh | 3+ | 45 | 15 | ox2-    | 3.36 | 2.01 | Δ | LIKRIH   |
| 12 | Rh | 3+ | 45 | 15 | ox2-    | 3.38 | 2.01 | Λ | SOZFIW   |
| 12 | Rh | 3+ | 45 | 19 | CH3CN   | 4.44 | 1.99 |   | VENYAO   |
| 12 | Rh | 3+ | 45 | 21 | NH3     | 4.62 | 2.08 |   | XEDNEZ   |
| 12 | Rh | 3+ | 45 | 21 | NH3     | 4.57 | 2.07 |   | XEDNEZ2  |
| 12 | Rh | 3+ | 45 | 22 | en      | 4.49 | 2.09 | Λ | AGUJIW   |
| 12 | Rh | 3+ | 45 | 22 | en      | 4.68 | 2.06 | Δ | CRHENC   |
| 12 | Rh | 3+ | 45 | 22 | en      | 4.66 | 2.07 | Λ | DARGUY   |
| 12 | Rh | 3+ | 45 | 22 | en      | 4.65 | 2.06 | Λ | TENRHC   |
| 12 | Rh | 3+ | 45 | 23 | bpy     | 4.64 | 2.04 | Λ | DIWGIZ   |
| 12 | Rh | 3+ | 45 | 23 | bpy     | 4.76 | 2.02 | Λ | FERYIK   |
| 12 | Rh | 3+ | 45 | 23 | bpy     | 4.72 | 2.06 | Δ | FERTIK2  |
| 12 | Rh | 3+ | 45 | 26 | NO2-    | 5.83 | 2.03 |   | TEDDOV   |
| 12 | Rh | 3+ | 45 | 26 | NO2-    | 6.04 | 2.08 |   | TEDDOV2  |
| 13 | Ru | 3+ | 44 | 5  | Cl-     | 2.42 | 2.38 |   | ENIDAG   |
| 13 | Ru | 3+ | 44 | 5  | Cl-     | 2.43 | 2.37 |   | HEVCOA   |
| 13 | Ru | 3+ | 44 | 5  | Cl-     | 2.42 | 2.38 |   | HOCXUS   |
| 13 | Ru | 3+ | 44 | 5  | Cl-     | 2.43 | 2.37 |   | TAVTUF   |

|    |    |    |    |    |      |      |      |   |          |
|----|----|----|----|----|------|------|------|---|----------|
| 13 | Ru | 3+ | 44 | 5  | Cl-  | 2.44 | 2.37 |   | YOJBUE   |
| 13 | Ru | 3+ | 44 | 15 | ox2- | 3.58 | 2.03 | Λ | DUKNOM   |
| 13 | Ru | 3+ | 44 | 15 | ox2- | 3.43 | 2.04 | Λ | IDECOK   |
| 13 | Ru | 3+ | 44 | 15 | ox2- | 3.49 | 2.03 | Λ | OLABAE   |
| 13 | Ru | 3+ | 44 | 16 | H2O  | 3.08 | 2.03 |   | BONPID   |
| 13 | Ru | 3+ | 44 | 28 | CN-  | 6.60 | 2.05 |   | KAGLAG   |
| 14 | Pd | 4+ | 46 | 5  | Cl-  | 2.55 | 2.31 |   | JIZLOT   |
| 14 | Pd | 4+ | 46 | 5  | Cl-  | 2.10 | 2.42 |   | LAHFUV   |
| 15 | Ir | 3+ | 77 | 4  | SCN- | 2.87 | 2.38 |   | PORQAO   |
| 15 | Ir | 3+ | 77 | 21 | NH3  | 4.99 | 2.10 |   | XEDNID   |
| 15 | Ir | 3+ | 77 | 21 | NH3  | 5.24 | 2.08 |   | XEDNID2  |
| 15 | Ir | 3+ | 77 | 22 | en   | 5.12 | 2.10 | Δ | UBEFEM   |
| 15 | Ir | 3+ | 77 | 22 | en   | 5.36 | 2.20 | Λ | DARHAF   |
| 15 | Ir | 3+ | 77 | 23 | bpy  | 5.46 | 2.02 | Δ | CEZMAV   |
| 15 | Ir | 3+ | 77 | 29 | CO   | 7.26 | 2.03 |   | XOLYIG   |
| 16 | Re | 4+ | 75 | 2  | Br-  | 3.13 | 2.49 |   | AYOMAC   |
| 16 | Re | 4+ | 75 | 5  | Cl-  | 3.10 | 2.36 |   | AYOLUV   |
| 16 | Re | 4+ | 75 | 5  | Cl-  | 3.10 | 2.36 |   | AYOMEG   |
| 16 | Re | 4+ | 75 | 5  | Cl-  | 3.12 | 2.35 |   | HIDGIK   |
| 16 | Re | 4+ | 75 | 5  | Cl-  | 3.06 | 2.36 |   | IWOZID   |
| 16 | Re | 4+ | 75 | 17 | NCS- | 5.08 | 2.02 |   | OGAKIR   |
| 16 | Re | 4+ | 75 | 17 | NCS- | 5.11 | 2.07 |   | OGAKIR2  |
| 16 | Re | 4+ | 75 | 17 | NCS- | 4.76 | 1.98 |   | XUCBON   |
| 17 | Pt | 4+ | 78 | 1  | I-   | 2.89 | 2.67 |   | PYPTHI   |
| 17 | Pt | 4+ | 78 | 1  | I-   | 2.87 | 2.67 |   | KIBMIS   |
| 17 | Pt | 4+ | 78 | 1  | I-   | 2.91 | 2.66 |   | KIBMOY   |
| 17 | Pt | 4+ | 78 | 2  | Br-  | 3.00 | 2.47 |   | AZELEW   |
| 17 | Pt | 4+ | 78 | 2  | Br-  | 2.99 | 2.47 |   | AZELEW2  |
| 17 | Pt | 4+ | 78 | 4  | SCN- | 2.39 | 2.68 |   | BULVAF   |
| 17 | Pt | 4+ | 78 | 4  | SCN- | 2.87 | 2.39 |   | EMUVOX   |
| 17 | Pt | 4+ | 78 | 4  | SCN- | 2.24 | 2.38 |   | XECZAG   |
| 17 | Pt | 4+ | 78 | 5  | Cl-  | 2.91 | 2.32 |   | AKCLPT   |
| 17 | Pt | 4+ | 78 | 5  | Cl-  | 2.85 | 2.33 |   | BIBRIN   |
| 17 | Pt | 4+ | 78 | 5  | Cl-  | 2.90 | 2.32 |   | MIMDPT   |
| 17 | Pt | 4+ | 78 | 5  | Cl-  | 2.88 | 2.32 |   | MINLAW   |
| 17 | Pt | 4+ | 78 | 28 | CN-  | 6.76 | 2.02 |   | YASNUC   |
| 17 | Pt | 4+ | 78 | 28 | CN-  | 6.81 | 1.99 |   | COZVAO   |
|    | Sc | 3+ | 21 | 7  | F-   | 2.15 | 2.03 |   | DEDNAC   |
|    | Sc | 3+ | 21 | 7  | F-   | 2.20 | 2.05 |   | HEYRUZ   |
|    | Sc | 3+ | 21 | 16 | H2O  | 1.99 | 2.09 |   | CEMXXAU  |
|    | Sc | 3+ | 21 | 17 | NCS- | 2.95 | 2.18 |   | BUQMOP   |
|    | Sc | 3+ | 21 | 17 | NCS- | 2.90 | 2.16 |   | XAJMOK   |
|    | Ti | 3+ | 22 | 16 | H2O  | 2.23 | 2.03 |   | LIMPUS   |
|    | Ti | 3+ | 22 | 28 | CN-  | 3.85 | 2.18 |   | NAYWOZ   |
|    | Ti | 3+ | 22 |    | urea | 2.80 | 2.01 |   | TIUREA01 |
|    | Ti | 4+ | 22 | 5  | Cl-  | 2.08 | 2.34 |   | BARMAJ   |
|    | Ti | 4+ | 22 | 5  | Cl-  | 2.08 | 2.34 |   | FEPHOX   |
|    | Ti | 4+ | 22 | 6  | N3-  | 1.54 | 2.02 |   | BEYNUP   |
|    | Ti | 4+ | 22 | 7  | F-   | 3.08 | 1.84 |   | AHUNEW   |
|    | Ti | 4+ | 22 | 7  | F-   | 3.06 | 1.86 |   | KOYXOL   |
|    | Ti | 4+ | 22 | 7  | F-   | 3.16 | 1.84 |   | LORCEA   |
|    | Ti | 4+ | 22 | 7  | F-   | 3.82 | 1.76 |   | SIXXAY   |
|    | V  | 4+ | 23 | 5  | Cl-  | 2.03 | 2.31 |   | SAHJER   |
|    | Cr | 2+ | 24 | 16 | H2O  | 1.66 | 2.04 |   | GIMZIM   |
|    | Cr | 2+ | 24 | 23 | bpy  | 3.00 | 2.08 | Λ | ACAYUZ   |

|  |    |    |    |    |       |      |      |   |          |
|--|----|----|----|----|-------|------|------|---|----------|
|  | Mn | 3+ | 25 | 15 | ox2-  | 2.05 | 2.00 | Δ | ZZZCCG10 |
|  | Mn | 3+ | 25 | 16 | H2O   | 1.33 | 2.16 |   | GUKGAV   |
|  | Mn | 3+ | 25 | 28 | CN-   | 4.33 | 2.01 |   | BIFZOG   |
|  | Mn | 3+ | 25 | 28 | CN-   | 4.22 | 2.02 |   | KAHKIN   |
|  | Mn | 3+ | 25 |    | urea  | 1.93 | 1.99 |   | BOPWEI   |
|  | Mn | 4+ | 25 | 17 | NCS-  | 1.22 | 2.22 |   | MUPSOF1  |
|  | Mn | 4+ | 25 | 17 | NCS-  | 1.17 | 2.23 |   | MUPSOF2  |
|  | Ni | 3+ | 28 | 23 | bpy   | 2.94 | 1.98 | Δ | CUHVUW   |
|  | Cu | 2+ | 29 | 2  | Br-   | 0.96 | 2.52 |   | TIVJEN   |
|  | Cu | 2+ | 29 | 5  | Cl-   | 0.93 | 2.51 |   | FOWCUP   |
|  | Cu | 2+ | 29 | 5  | Cl-   | 0.93 | 2.50 |   | GOKWUY   |
|  | Cu | 2+ | 29 | 5  | Cl-   | 0.99 | 2.47 |   | POCJAS   |
|  | Cu | 2+ | 29 | 16 | H2O   | 1.20 | 2.10 |   | DILCIL   |
|  | Cu | 2+ | 29 | 16 | H2O   | 1.26 | 2.12 |   | DODDOP   |
|  | Cu | 2+ | 29 | 16 | H2O   | 1.26 | 2.11 |   | KAGNEM   |
|  | Cu | 2+ | 29 | 16 | H2O   | 1.16 | 2.11 |   | SIYZIJ   |
|  | Zn | 2+ | 30 | 16 | H2O   | 1.96 | 2.07 |   | BENBIG   |
|  | Zn | 2+ | 30 | 16 | H2O   | 2.84 | 2.07 |   | CITDAK   |
|  | Zn | 2+ | 30 | 16 | H2O   | 1.58 | 2.09 |   | FOGWUU   |
|  | Zn | 2+ | 30 | 16 | H2O   | 2.62 | 2.09 |   | KAMPEU   |
|  | Y  | 3+ | 39 | 5  | Cl-   | 2.44 | 2.62 |   | WAPJUT   |
|  | Y  | 3+ | 39 | 17 | NCS-  | 3.22 | 2.33 |   | KAKQES   |
|  | Zr | 3+ | 40 | 2  | Br-   | 2.68 | 2.62 |   | SENPOQ   |
|  | Zr | 4+ | 40 | 1  | I-    | 2.27 | 2.86 |   | RIQPEN   |
|  | Zr | 4+ | 40 | 5  | Cl-   | 2.86 | 2.47 |   | TUCNIO   |
|  | Zr | 4+ | 40 | 5  | Cl-   | 2.86 | 2.47 |   | FOHREZ   |
|  | Zr | 4+ | 40 | 5  | Cl-   | 2.88 | 2.46 |   | JAVKEW   |
|  | Zr | 4+ | 40 | 7  | F-    | 4.11 | 2.01 |   | TIZXAC   |
|  | Zr | 4+ | 40 | 7  | F-    | 4.28 | 2.01 |   | KOJVAG   |
|  | Zr | 4+ | 40 | 7  | F-    | 4.18 | 2.01 |   | QOFCOE   |
|  | Nb | 4+ | 41 | 5  | Cl-   | 2.88 | 2.41 |   | KEWHOJ   |
|  | Nb | 4+ | 41 | 7  | F-    | 4.44 | 1.93 |   | ROZLOI   |
|  | Nb | 5+ | 41 | 5  | Cl-   | 3.25 | 2.34 |   | FIRMOJ   |
|  | Nb | 5+ | 41 | 5  | Cl-   | 3.26 | 2.34 |   | NUYFOC   |
|  | Nb | 5+ | 41 | 5  | Cl-   | 3.24 | 2.34 |   | GOLJEW   |
|  | Mo | 4+ | 42 | 2  | Br-   | 2.73 | 2.53 |   | FUYGUB   |
|  | Mo | 4+ | 42 | 5  | Cl-   | 2.93 | 2.35 |   | FIPDEO   |
|  | Mo | 4+ | 42 | 5  | Cl-   | 2.82 | 2.38 |   | ZICWOX   |
|  | Mo | 4+ | 42 | 5  | Cl-   | 2.80 | 2.38 |   | FUTPIT   |
|  | Mo | 4+ | 42 | 7  | F-    | 4.38 | 1.92 |   | ROZLIC   |
|  | Mo | 4+ | 42 | 28 | CN-   | 6.80 | 2.90 |   | HITPOQ   |
|  | Mo | 5+ | 42 | 5  | Cl-   | 3.18 | 2.31 |   | JAWRUU   |
|  | Tc | 2+ | 43 | 19 | CH3CN | 4.62 | 2.06 |   | TEQNAE   |
|  | Tc | 4+ | 43 | 5  | Cl-   | 2.74 | 2.36 |   | CIMFEJ   |
|  | Tc | 4+ | 43 | 5  | Cl-   | 2.77 | 2.35 |   | JEPQOL   |
|  | Tc | 4+ | 43 | 5  | Cl-   | 2.76 | 2.35 |   | KAXQUW   |
|  | Tc | 4+ | 43 | 5  | Cl-   | 2.74 | 2.36 |   | LALHAH   |
|  | Tc | 4+ | 43 | 15 | ox2-  | 4.00 | 1.99 | Λ | FOPBAN   |
|  | Tc | 4+ | 43 | 17 | NCS-  | 4.39 | 2.00 |   | FEKWEX   |
|  | Tc | 5+ | 43 | 2  | Br-   | 3.14 | 2.50 |   | PSBRNB   |
|  | Ru | 2+ | 44 | 5  | Cl-   | 2.26 | 2.37 |   | WUGCOQ   |
|  | Ru | 2+ | 44 | 16 | H2O   | 2.39 | 2.12 |   | BONPEZ   |
|  | Ru | 2+ | 44 | 16 | H2O   | 2.86 | 2.09 |   | OLUXAU   |

|  |    |    |    |    |       |      |      |   |          |
|--|----|----|----|----|-------|------|------|---|----------|
|  | Ru | 2+ | 44 | 19 | CH3CN | 4.54 | 2.09 |   | ACEYAI   |
|  | Ru | 2+ | 44 | 19 | CH3CN | 4.56 | 2.03 |   | PUHSOB   |
|  | Ru | 2+ | 44 | 19 | CH3CN | 4.87 | 2.01 |   | FEWRII   |
|  | Ru | 2+ | 44 | 20 | py    | 4.31 | 2.13 |   | HPYRUB   |
|  | Ru | 2+ | 44 | 22 | en    | 3.84 | 2.13 | Δ | BABRAX   |
|  | Ru | 2+ | 44 | 23 | bpy   | 4.89 | 2.05 | Λ | AXAFIO   |
|  | Ru | 2+ | 44 | 28 | CN-   | 6.76 | 2.03 |   | QEZYAV   |
|  | Ru | 2+ | 44 | 28 | CN-   | 6.99 | 2.03 |   | WUGSEW   |
|  | Ru | 2+ | 44 | 29 | CO    | 6.82 | 2.02 |   | LARPAW   |
|  | Ru | 2+ | 44 | 29 | CO    | 6.59 | 2.04 |   | LARPIE   |
|  | Ru | 4+ | 44 | 5  | Cl-   | 2.74 | 2.32 |   | GAZNOK   |
|  | Ru | 4+ | 44 | 5  | Cl-   | 2.72 | 2.33 |   | YARREP   |
|  | Hf | 4+ | 72 | 5  | Cl-   | 3.11 | 2.45 |   | BARWIB   |
|  | Hf | 4+ | 72 | 5  | Cl-   | 3.13 | 2.44 |   | FEBHIE   |
|  | Hf | 4+ | 72 | 5  | Cl-   | 3.09 | 2.45 |   | JESFOC   |
|  | Hf | 4+ | 72 | 7  | F-    | 4.71 | 1.99 |   | RENPAB   |
|  | Ta | 4+ | 73 | 7  | F-    | 5.93 | 1.86 |   | CEYCEO   |
|  | Ta | 5+ | 73 | 2  | Br-   | 3.50 | 2.49 |   | BDASTA   |
|  | Ta | 5+ | 73 | 5  | Cl-   | 3.51 | 2.34 |   | EMUCOE   |
|  | Ta | 5+ | 73 | 5  | Cl-   | 3.59 | 2.33 |   | FIKGAH   |
|  | Ta | 5+ | 73 | 7  | F-    | 5.72 | 1.87 |   | ECANAY   |
|  | Ta | 5+ | 73 | 7  | F-    | 5.43 | 1.89 |   | GUCCEN   |
|  | W  | 3+ | 74 | 5  | Cl-   | 2.20 | 2.58 |   | LEXSIR   |
|  | W  | 4+ | 74 | 5  | Cl-   | 3.31 | 2.34 |   | EGUKIB   |
|  | W  | 4+ | 74 | 5  | Cl-   | 3.24 | 2.36 |   | HUYDIO   |
|  | W  | 4+ | 74 | 5  | Cl-   | 3.10 | 2.38 |   | JAKBEC   |
|  | W  | 4+ | 74 | 7  | F-    | 6.86 | 1.78 |   | ZIYWAF   |
|  | W  | 5+ | 74 | 5  | Cl-   | 3.48 | 2.30 |   | BUCBAC   |
|  | W  | 5+ | 74 | 5  | Cl-   | 3.50 | 2.30 |   | JATFIT   |
|  | W  | 5+ | 74 | 7  | F-    | 6.56 | 1.78 |   | ZOLKEQ   |
|  | Os | 2+ | 76 | 23 | bpy   | 5.14 | 2.04 | Λ | HIRDOB   |
|  | Os | 2+ | 76 | 23 | bpy   | 5.25 | 2.08 | Λ | HIRDOB2  |
|  | Os | 2+ | 76 | 29 | CO    | 8.25 | 2.00 |   | CEHHIH   |
|  | Os | 2+ | 76 | 29 | CO    | 7.96 | 2.02 |   | LARPEA   |
|  | Os | 2+ | 76 | 29 | CO    | 7.89 | 2.03 |   | LARPOK   |
|  | Os | 3+ | 76 | 17 | NCS-  | 4.36 | 2.02 |   | QIJJEY   |
|  | Os | 3+ | 76 | 22 | en    | 5.25 | 2.11 | Δ | FISFAO   |
|  | Os | 3+ | 76 | 28 | CN-   | 7.07 | 2.05 |   | OCIJIU   |
|  | Os | 3+ | 76 | 28 | CN-   | 7.04 | 2.07 |   | OCIJIU2  |
|  | Os | 4+ | 76 | 5  | Cl-   | 3.10 | 2.33 |   | CEXRIG   |
|  | Os | 4+ | 76 | 5  | Cl-   | 3.06 | 2.34 |   | ENIDUA   |
|  | Os | 4+ | 76 | 5  | Cl-   | 3.09 | 2.33 |   | GEBLUU   |
|  | Os | 4+ | 76 | 7  | F-    | 4.19 | 1.93 |   | UFPEEA   |
|  | Os | 4+ | 76 | 17 | NCS-  | 4.40 | 2.01 |   | QIJJAU   |
|  | Os | 4+ | 76 | 17 | NCS-  | 4.40 | 2.01 |   | QIJJAU2  |
|  | Os | 5+ | 76 | 5  | Cl-   | 3.37 | 2.28 |   | CEXREC   |
|  | Ir | 4+ | 77 | 5  | Cl-   | 3.01 | 2.66 |   | GALQAL   |
|  | Ir | 4+ | 77 | 5  | Cl-   | 3.01 | 2.33 |   | MIRKEE   |
|  | Ir | 4+ | 77 | 5  | Cl-   | 3.05 | 2.32 |   | NAYQOU   |
|  | Ir | 4+ | 77 | 5  | Cl-   | 3.03 | 2.32 |   | RIHFAP   |
|  | Ir | 4+ | 77 | 5  | Cl-   | 3.02 | 2.33 |   | TEVFIJ   |
|  | Ir | 4+ | 77 | 7  | F-    | 3.72 | 1.92 |   | TMAPTF01 |
|  |    |    |    | 3  | S2-   |      |      |   |          |



|  |  |  |  |    |        |  |  |  |  |
|--|--|--|--|----|--------|--|--|--|--|
|  |  |  |  | 8  | S2O32- |  |  |  |  |
|  |  |  |  | 9  | OCOR-  |  |  |  |  |
|  |  |  |  | 10 | OCO22- |  |  |  |  |
|  |  |  |  | 11 | OH-    |  |  |  |  |
|  |  |  |  | 13 | OSO32- |  |  |  |  |
|  |  |  |  | 14 | ONO2-  |  |  |  |  |
|  |  |  |  | 18 | ONO-   |  |  |  |  |
|  |  |  |  | 25 | SO32-  |  |  |  |  |
|  |  |  |  | 27 | PPh3   |  |  |  |  |

| Ligand Series No. | Ligand | Metal | Valence | Metal Atomic No. | Metal Series No. | Ligand Field Splitting $\Delta$ (eV) | Metal Ligand Distance M-L (Å) | Chirality (bidentate ligand) | CSD Reference Code |
|-------------------|--------|-------|---------|------------------|------------------|--------------------------------------|-------------------------------|------------------------------|--------------------|
| 1                 | I-     | Zr    | 4+      | 40               |                  | 2.27                                 | 2.86                          |                              | RIQPEN             |
| 1                 | I-     | Pt    | 4+      | 78               | 17               | 2.89                                 | 2.67                          |                              | PYPTHI             |
| 1                 | I-     | Pt    | 4+      | 78               | 17               | 2.87                                 | 2.67                          |                              | KIBMIS             |
| 1                 | I-     | Pt    | 4+      | 78               | 17               | 2.91                                 | 2.66                          |                              | KIBMOY             |
| 2                 | Br-    | Cr    | 3+      | 24               | 7                | 1.48                                 | 2.64                          |                              | YIBWOV             |
| 2                 | Br-    | Cu    | 2+      | 29               |                  | 0.96                                 | 2.52                          |                              | TIVJEN             |
| 2                 | Br-    | Zr    | 3+      | 40               |                  | 2.68                                 | 2.62                          |                              | SENPOQ             |
| 2                 | Br-    | Mo    | 4+      | 42               |                  | 2.73                                 | 2.53                          |                              | FUYGUB             |
| 2                 | Br-    | Mo    | 3+      | 42               | 11               | 2.36                                 | 2.59                          |                              | DOMTII             |
| 2                 | Br-    | Tc    | 5+      | 43               |                  | 3.14                                 | 2.50                          |                              | PSBRNB             |
| 2                 | Br-    | Rh    | 3+      | 45               | 12               | 2.43                                 | 2.50                          |                              | HUQMEL             |
| 2                 | Br-    | Rh    | 3+      | 45               | 12               | 2.51                                 | 2.53                          |                              | ZOKHEM             |
| 2                 | Br-    | Ta    | 5+      | 73               |                  | 3.50                                 | 2.49                          |                              | BDASTA             |
| 2                 | Br-    | Re    | 4+      | 75               | 16               | 3.13                                 | 2.49                          |                              | AYOMAC             |
| 2                 | Br-    | Pt    | 4+      | 78               | 17               | 3.00                                 | 2.47                          |                              | AZELEW             |
| 2                 | Br-    | Pt    | 4+      | 78               | 17               | 2.99                                 | 2.47                          |                              | AZELEW2            |
| 3                 | S2-    |       |         |                  |                  |                                      |                               |                              |                    |
| 4                 | SCN-   | Rh    | 3+      | 45               | 12               | 2.34                                 | 2.37                          |                              | YURKIF             |
| 4                 | SCN-   | Ir    | 3+      | 77               | 15               | 2.87                                 | 2.38                          |                              | PORQAO             |
| 4                 | SCN-   | Pt    | 4+      | 78               | 17               | 2.39                                 | 2.68                          |                              | BULVAF             |
| 4                 | SCN-   | Pt    | 4+      | 78               | 17               | 2.87                                 | 2.39                          |                              | EMUVOX             |
| 4                 | SCN-   | Pt    | 4+      | 78               | 17               | 2.24                                 | 2.38                          |                              | XECZAG             |
| 5                 | Cl-    | Ti    | 4+      | 22               |                  | 2.08                                 | 2.34                          |                              | BARMAJ             |
| 5                 | Cl-    | Ti    | 4+      | 22               |                  | 2.08                                 | 2.34                          |                              | FEPHOX             |
| 5                 | Cl-    | V     | 4+      | 23               |                  | 2.03                                 | 2.31                          |                              | SAHJER             |
| 5                 | Cl-    | V     | 3+      | 23               | 8                | 1.66                                 | 2.39                          |                              | YUDFUY             |
| 5                 | Cl-    | V     | 3+      | 23               | 8                | 1.64                                 | 2.39                          |                              | YUDFUY2            |
| 5                 | Cl-    | Cr    | 3+      | 24               | 7                | 1.61                                 | 2.36                          |                              | FAMVUK10           |
| 5                 | Cl-    | Mn    | 2+      | 25               | 1                | 0.86                                 | 2.57                          |                              | DEFWOB             |
| 5                 | Cl-    | Mn    | 2+      | 25               | 1                | 0.83                                 | 2.58                          |                              | LIDQUL             |
| 5                 | Cl-    | Fe    | 2+      | 26               | 4                | 1.15                                 | 2.39                          |                              | MAFECL             |
| 5                 | Cl-    | Fe    | 3+      | 26               | 6                | 1.38                                 | 2.38                          |                              | DALLIL             |
| 5                 | Cl-    | Fe    | 3+      | 26               | 6                | 1.35                                 | 2.40                          |                              | KAPLOD             |
| 5                 | Cl-    | Fe    | 3+      | 26               | 6                | 1.38                                 | 2.39                          |                              | PIMXIS             |
| 5                 | Cl-    | Fe    | 3+      | 26               | 6                | 1.35                                 | 2.40                          |                              | TOQDAE             |
| 5                 | Cl-    | Co    | 2+      | 27               | 3                | 0.94                                 | 2.47                          |                              | HOCQUL             |
| 5                 | Cl-    | Ni    | 2+      | 28               | 2                | 0.98                                 | 2.45                          |                              | ZALNIJ             |
| 5                 | Cl-    | Cu    | 2+      | 29               |                  | 0.93                                 | 2.51                          |                              | FOWCUP             |
| 5                 | Cl-    | Cu    | 2+      | 29               |                  | 0.93                                 | 2.50                          |                              | GOKWUY             |
| 5                 | Cl-    | Cu    | 2+      | 29               |                  | 0.99                                 | 2.47                          |                              | POCJAS             |
| 5                 | Cl-    | Y     | 3+      | 39               |                  | 2.44                                 | 2.62                          |                              | WAPJUT             |
| 5                 | Cl-    | Zr    | 4+      | 40               |                  | 2.86                                 | 2.47                          |                              | TUCNIO             |
| 5                 | Cl-    | Zr    | 4+      | 40               |                  | 2.86                                 | 2.47                          |                              | FOHREZ             |
| 5                 | Cl-    | Zr    | 4+      | 40               |                  | 2.88                                 | 2.46                          |                              | JAVKEW             |
| 5                 | Cl-    | Nb    | 4+      | 41               |                  | 2.88                                 | 2.41                          |                              | KEWHOJ             |
| 5                 | Cl-    | Nb    | 5+      | 41               |                  | 3.25                                 | 2.34                          |                              | FIRMOJ             |
| 5                 | Cl-    | Nb    | 5+      | 41               |                  | 3.26                                 | 2.34                          |                              | NUYFOC             |
| 5                 | Cl-    | Nb    | 5+      | 41               |                  | 3.24                                 | 2.34                          |                              | GOLJEW             |
| 5                 | Cl-    | Mo    | 3+      | 42               | 11               | 2.41                                 | 2.45                          |                              | DEBLEB             |
| 5                 | Cl-    | Mo    | 3+      | 42               | 11               | 2.48                                 | 2.44                          |                              | PEPCOC             |

|   |     |    |    |    |    |      |      |  |        |
|---|-----|----|----|----|----|------|------|--|--------|
| 5 | Cl- | Mo | 4+ | 42 |    | 2.93 | 2.35 |  | FIPDEO |
| 5 | Cl- | Mo | 4+ | 42 |    | 2.82 | 2.38 |  | ZICWOX |
| 5 | Cl- | Mo | 4+ | 42 |    | 2.80 | 2.38 |  | FUTPIT |
| 5 | Cl- | Mo | 5+ | 42 |    | 3.18 | 2.31 |  | JAWRUU |
| 5 | Cl- | Tc | 4+ | 43 |    | 2.74 | 2.36 |  | CIMFEJ |
| 5 | Cl- | Tc | 4+ | 43 |    | 2.77 | 2.35 |  | JEPQOL |
| 5 | Cl- | Tc | 4+ | 43 |    | 2.76 | 2.35 |  | KAXQUW |
| 5 | Cl- | Tc | 4+ | 43 |    | 2.74 | 2.36 |  | LALHAH |
| 5 | Cl- | Ru | 2+ | 44 |    | 2.26 | 2.37 |  | WUGCOQ |
| 5 | Cl- | Ru | 3+ | 44 | 13 | 2.42 | 2.38 |  | ENIDAG |
| 5 | Cl- | Ru | 3+ | 44 | 13 | 2.43 | 2.37 |  | HEVCOA |
| 5 | Cl- | Ru | 3+ | 44 | 13 | 2.42 | 2.38 |  | HOCXUS |
| 5 | Cl- | Ru | 3+ | 44 | 13 | 2.43 | 2.37 |  | TAVTUF |
| 5 | Cl- | Ru | 3+ | 44 | 13 | 2.44 | 2.37 |  | YOJBUU |
| 5 | Cl- | Ru | 4+ | 44 |    | 2.74 | 2.32 |  | GAZNOK |
| 5 | Cl- | Ru | 4+ | 44 |    | 2.72 | 2.33 |  | YARREP |
| 5 | Cl- | Rh | 3+ | 45 | 12 | 2.44 | 2.35 |  | FEWGET |
| 5 | Cl- | Rh | 3+ | 45 | 12 | 2.45 | 2.34 |  | RIXHIP |
| 5 | Cl- | Rh | 3+ | 45 | 12 | 2.43 | 2.35 |  | TIBWIK |
| 5 | Cl- | Rh | 3+ | 45 | 12 | 2.46 | 2.35 |  | XISFEL |
| 5 | Cl- | Pd | 4+ | 46 | 14 | 2.55 | 2.31 |  | JIZLOT |
| 5 | Cl- | Pd | 4+ | 46 | 14 | 2.10 | 2.42 |  | LAHFUV |
| 5 | Cl- | Hf | 4+ | 72 |    | 3.11 | 2.45 |  | BARWIB |
| 5 | Cl- | Hf | 4+ | 72 |    | 3.13 | 2.44 |  | FEBHIE |
| 5 | Cl- | Hf | 4+ | 72 |    | 3.09 | 2.45 |  | JESFOC |
| 5 | Cl- | Ta | 5+ | 73 |    | 3.51 | 2.34 |  | EMUCOE |
| 5 | Cl- | Ta | 5+ | 73 |    | 3.59 | 2.33 |  | FIKGAH |
| 5 | Cl- | W  | 3+ | 74 |    | 2.20 | 2.58 |  | LEXSIR |
| 5 | Cl- | W  | 4+ | 74 |    | 3.31 | 2.34 |  | EGUKIB |
| 5 | Cl- | W  | 4+ | 74 |    | 3.24 | 2.36 |  | HUYDIO |
| 5 | Cl- | W  | 4+ | 74 |    | 3.10 | 2.38 |  | JAKBEC |
| 5 | Cl- | W  | 5+ | 74 |    | 3.48 | 2.30 |  | BUCBAC |
| 5 | Cl- | W  | 5+ | 74 |    | 3.50 | 2.30 |  | JATFIT |
| 5 | Cl- | Re | 4+ | 75 | 16 | 3.10 | 2.36 |  | AYOLUV |
| 5 | Cl- | Re | 4+ | 75 | 16 | 3.10 | 2.36 |  | AYOMEG |
| 5 | Cl- | Re | 4+ | 75 | 16 | 3.12 | 2.35 |  | HIDGIK |
| 5 | Cl- | Re | 4+ | 75 | 16 | 3.06 | 2.36 |  | IWOZID |
| 5 | Cl- | Os | 4+ | 76 |    | 3.10 | 2.33 |  | CEXRIG |
| 5 | Cl- | Os | 4+ | 76 |    | 3.06 | 2.34 |  | ENIDUA |
| 5 | Cl- | Os | 4+ | 76 |    | 3.09 | 2.33 |  | GEBLUU |
| 5 | Cl- | Os | 5+ | 76 |    | 3.37 | 2.28 |  | CEXREC |
| 5 | Cl- | Ir | 4+ | 77 |    | 3.01 | 2.66 |  | GALQAL |
| 5 | Cl- | Ir | 4+ | 77 |    | 3.01 | 2.33 |  | MIRKEE |
| 5 | Cl- | Ir | 4+ | 77 |    | 3.05 | 2.32 |  | NAYQOU |
| 5 | Cl- | Ir | 4+ | 77 |    | 3.03 | 2.32 |  | RIHFAP |
| 5 | Cl- | Ir | 4+ | 77 |    | 3.02 | 2.33 |  | TEVFIJ |
| 5 | Cl- | Pt | 4+ | 78 | 17 | 2.91 | 2.32 |  | AKCLPT |
| 5 | Cl- | Pt | 4+ | 78 | 17 | 2.85 | 2.33 |  | BIBRIN |
| 5 | Cl- | Pt | 4+ | 78 | 17 | 2.90 | 2.32 |  | MIMDPT |
| 5 | Cl- | Pt | 4+ | 78 | 17 | 2.88 | 2.32 |  | MINLAW |
| 6 | N3- | Ti | 4+ | 22 |    | 1.54 | 2.02 |  | BEYNUP |
| 7 | F-  | Sc | 3+ | 21 |    | 2.15 | 2.03 |  | DEDNAC |
| 7 | F-  | Sc | 3+ | 21 |    | 2.20 | 2.05 |  | HEYRUZ |

|    |        |    |    |    |    |      |      |   |          |
|----|--------|----|----|----|----|------|------|---|----------|
| 7  | F-     | Ti | 4+ | 22 |    | 3.08 | 1.84 |   | AHUNEW   |
| 7  | F-     | Ti | 4+ | 22 |    | 3.06 | 1.86 |   | KOYXOL   |
| 7  | F-     | Ti | 4+ | 22 |    | 3.16 | 1.84 |   | LORCEA   |
| 7  | F-     | Ti | 4+ | 22 |    | 3.82 | 1.76 |   | SIXXAY   |
| 7  | F-     | V  | 3+ | 23 | 8  | 2.00 | 1.97 |   | LIDYUT   |
| 7  | F-     | V  | 3+ | 23 | 8  | 2.49 | 1.90 |   | WOHDIG   |
| 7  | F-     | Cr | 3+ | 24 | 7  | 2.13 | 1.90 |   | ADOSOC   |
| 7  | F-     | Cr | 3+ | 24 | 7  | 2.17 | 1.90 |   | GAWBUC   |
| 7  | F-     | Fe | 3+ | 26 | 6  | 1.79 | 1.90 |   | FULHOJ   |
| 7  | F-     | Zr | 4+ | 40 |    | 4.11 | 2.01 |   | TIZXAC   |
| 7  | F-     | Zr | 4+ | 40 |    | 4.28 | 2.01 |   | KOJVAG   |
| 7  | F-     | Zr | 4+ | 40 |    | 4.18 | 2.01 |   | QOFCOE   |
| 7  | F-     | Nb | 4+ | 41 |    | 4.44 | 1.93 |   | ROZLOI   |
| 7  | F-     | Mo | 4+ | 42 |    | 4.38 | 1.92 |   | ROZLIC   |
| 7  | F-     | Hf | 4+ | 72 |    | 4.71 | 1.99 |   | RENPAB   |
| 7  | F-     | Ta | 4+ | 73 |    | 5.93 | 1.86 |   | CEYCEO   |
| 7  | F-     | Ta | 5+ | 73 |    | 5.72 | 1.87 |   | ECANAY   |
| 7  | F-     | Ta | 5+ | 73 |    | 5.43 | 1.89 |   | GUCCEN   |
| 7  | F-     | W  | 4+ | 74 |    | 6.86 | 1.78 |   | ZIYWAF   |
| 7  | F-     | W  | 5+ | 74 |    | 6.56 | 1.78 |   | ZOLKEQ   |
| 7  | F-     | Os | 4+ | 76 |    | 4.19 | 1.93 |   | UFEPEA   |
| 7  | F-     | Ir | 4+ | 77 |    | 3.72 | 1.92 |   | TMAPTF01 |
| 8  | S2O32- |    |    |    |    |      |      |   |          |
| 9  | OCOR-  |    |    |    |    |      |      |   |          |
| 10 | OCO22- |    |    |    |    |      |      |   |          |
| 11 | OH-    |    |    |    |    |      |      |   |          |
| 12 | OCHO-  | Cr | 3+ | 24 | 7  | 2.35 | 1.98 |   | GICNEL   |
| 12 | OCHO-  | Mo | 3+ | 42 | 11 | 3.59 | 2.11 |   | GICNAH   |
| 13 | OSO32- |    |    |    |    |      |      |   |          |
| 14 | ONO2-  |    |    |    |    |      |      |   |          |
| 15 | ox2-   | V  | 3+ | 23 | 8  | 2.30 | 2.01 | Δ | KOXLTV01 |
| 15 | ox2-   | Cr | 3+ | 24 | 7  | 2.52 | 1.97 | Λ | CROXKH   |
| 15 | ox2-   | Cr | 3+ | 24 | 7  | 2.60 | 1.96 | Λ | DITFER   |
| 15 | ox2-   | Cr | 3+ | 24 | 7  | 2.52 | 1.97 | Δ | FPCOS    |
| 15 | ox2-   | Cr | 3+ | 24 | 7  | 2.58 | 1.97 | Λ | GUKGID   |
| 15 | ox2-   | Cr | 3+ | 24 | 7  | 2.44 | 1.97 | Δ | RUPGEP   |
| 15 | ox2-   | Mn | 3+ | 25 |    | 2.05 | 2.00 | Δ | ZZZCCG10 |
| 15 | ox2-   | Fe | 2+ | 26 | 4  | 1.83 | 2.00 | Δ | LIPXIS   |
| 15 | ox2-   | Fe | 3+ | 26 | 6  | 1.91 | 2.00 | Δ | BEMPEO   |
| 15 | ox2-   | Fe | 3+ | 26 | 6  | 1.78 | 2.00 | Δ | ARABEA   |
| 15 | ox2-   | Fe | 3+ | 26 | 6  | 1.82 | 2.01 | Λ | GEXQOP   |
| 15 | ox2-   | Co | 3+ | 27 | 9  | 2.26 | 1.92 | Λ | PNIOCO   |
| 15 | ox2-   | Co | 3+ | 27 | 9  | 2.48 | 1.90 | Δ | DAZVUV   |
| 15 | ox2-   | Co | 3+ | 27 | 9  | 2.42 | 1.89 | Λ | GUKGEZ   |
| 15 | ox2-   | Tc | 4+ | 43 |    | 4.00 | 1.99 | Λ | FOPBAN   |
| 15 | ox2-   | Ru | 3+ | 44 | 13 | 3.58 | 2.03 | Λ | DUKNOM   |
| 15 | ox2-   | Ru | 3+ | 44 | 13 | 3.43 | 2.04 | Λ | IDECOK   |
| 15 | ox2-   | Ru | 3+ | 44 | 13 | 3.49 | 2.03 | Λ | OLABAE   |
| 15 | ox2-   | Rh | 3+ | 45 | 12 | 3.49 | 2.02 | Λ | CAZCIP   |
| 15 | ox2-   | Rh | 3+ | 45 | 12 | 3.36 | 2.01 | Δ | LIKRIH   |
| 15 | ox2-   | Rh | 3+ | 45 | 12 | 3.38 | 2.01 | Λ | SOZFIW   |
| 16 | H2O    | Sc | 3+ | 21 |    | 1.99 | 2.09 |   | CEMXXU   |
| 16 | H2O    | Ti | 3+ | 22 |    | 2.23 | 2.03 |   | LIMPUS   |
| 16 | H2O    | V  | 2+ | 23 | 5  | 1.64 | 2.12 |   | VEPSUE   |
| 16 | H2O    | V  | 2+ | 23 | 5  | 2.52 | 1.96 |   | YEGSAF   |
| 16 | H2O    | V  | 3+ | 23 | 8  | 2.18 | 2.00 |   | COLNUM   |
| 16 | H2O    | V  | 3+ | 23 | 8  | 2.24 | 1.99 |   | FEMHOV   |
| 16 | H2O    | Cr | 2+ | 24 |    | 1.66 | 2.04 |   | GIMZIM   |

|    |      |    |    |    |    |      |      |  |          |
|----|------|----|----|----|----|------|------|--|----------|
| 16 | H2O  | Cr | 3+ | 24 | 7  | 2.17 | 1.97 |  | UCOME    |
| 16 | H2O  | Cr | 3+ | 24 | 7  | 2.27 | 1.97 |  | IWOJOT   |
| 16 | H2O  | Cr | 3+ | 24 | 7  | 2.11 | 1.96 |  | MEWZET01 |
| 16 | H2O  | Cr | 3+ | 24 | 7  | 2.15 | 1.96 |  | TAPBUH   |
| 16 | H2O  | Mn | 2+ | 25 | 1  | 1.08 | 2.16 |  | ASOVEJ   |
| 16 | H2O  | Mn | 2+ | 25 | 1  | 1.06 | 2.19 |  | COLWUV   |
| 16 | H2O  | Mn | 2+ | 25 | 1  | 1.08 | 2.17 |  | HEHSIW   |
| 16 | H2O  | Mn | 2+ | 25 | 1  | 1.09 | 2.17 |  | LEFYAX   |
| 16 | H2O  | Mn | 2+ | 25 | 1  | 1.22 | 2.17 |  | VIDGIZ   |
| 16 | H2O  | Mn | 3+ | 25 |    | 1.33 | 2.16 |  | GUKGAV   |
| 16 | H2O  | Fe | 2+ | 26 | 4  | 1.43 | 2.05 |  | AMITAR   |
| 16 | H2O  | Fe | 2+ | 26 | 4  | 1.19 | 2.10 |  | DIJUK    |
| 16 | H2O  | Fe | 2+ | 26 | 4  | 1.22 | 2.10 |  | EJATEO   |
| 16 | H2O  | Fe | 2+ | 26 | 4  | 1.04 | 2.12 |  | FEACIT   |
| 16 | H2O  | Fe | 2+ | 26 | 4  | 1.15 | 2.11 |  | NATGEV   |
| 16 | H2O  | Fe | 2+ | 26 | 4  | 1.12 | 2.10 |  | QEDCOR   |
| 16 | H2O  | Fe | 2+ | 26 | 4  | 1.32 | 2.12 |  | ZILZID   |
| 16 | H2O  | Fe | 3+ | 26 | 6  | 1.71 | 2.00 |  | MEWZAP   |
| 16 | H2O  | Fe | 3+ | 26 | 6  | 1.71 | 1.99 |  | XIGSEL   |
| 16 | H2O  | Co | 2+ | 27 | 3  | 1.18 | 2.10 |  | ASUDIB   |
| 16 | H2O  | Co | 2+ | 27 | 3  | 1.36 | 2.08 |  | BAVYOM   |
| 16 | H2O  | Co | 2+ | 27 | 3  | 1.17 | 2.09 |  | NEFIB    |
| 16 | H2O  | Co | 2+ | 27 | 3  | 1.16 | 2.07 |  | SUBUG    |
| 16 | H2O  | Co | 2+ | 27 | 3  | 1.12 | 2.07 |  | WABLIU10 |
| 16 | H2O  | Co | 3+ | 27 | 9  | 1.97 | 1.98 |  | ASAWOH   |
| 16 | H2O  | Ni | 2+ | 28 | 2  | 1.19 | 2.04 |  | JERNID   |
| 16 | H2O  | Ni | 2+ | 28 | 2  | 1.26 | 2.05 |  | LUMVAQ   |
| 16 | H2O  | Ni | 2+ | 28 | 2  | 1.25 | 2.05 |  | MAPHER   |
| 16 | H2O  | Ni | 2+ | 28 | 2  | 1.11 | 2.06 |  | SIYZEF   |
| 16 | H2O  | Ni | 2+ | 28 | 2  | 1.21 | 2.07 |  | VELQEJ   |
| 16 | H2O  | Cu | 2+ | 29 |    | 1.20 | 2.10 |  | DILCIL   |
| 16 | H2O  | Cu | 2+ | 29 |    | 1.26 | 2.12 |  | DODDOP   |
| 16 | H2O  | Cu | 2+ | 29 |    | 1.26 | 2.11 |  | KAGNEM   |
| 16 | H2O  | Cu | 2+ | 29 |    | 1.16 | 2.11 |  | SIYZIJ   |
| 16 | H2O  | Zn | 2+ | 30 |    | 1.96 | 2.07 |  | BENBIG   |
| 16 | H2O  | Zn | 2+ | 30 |    | 2.84 | 2.07 |  | CITDAK   |
| 16 | H2O  | Zn | 2+ | 30 |    | 1.58 | 2.09 |  | FOGWUU   |
| 16 | H2O  | Zn | 2+ | 30 |    | 2.62 | 2.09 |  | KAMPEU   |
| 16 | H2O  | Ru | 2+ | 44 |    | 2.39 | 2.12 |  | BONPEZ   |
| 16 | H2O  | Ru | 2+ | 44 |    | 2.86 | 2.09 |  | OLUXAU   |
| 16 | H2O  | Ru | 3+ | 44 | 13 | 3.08 | 2.03 |  | BONPID   |
| 17 | NCS- | Sc | 3+ | 21 |    | 2.95 | 2.18 |  | BUQMOP   |
| 17 | NCS- | Sc | 3+ | 21 |    | 2.90 | 2.16 |  | XAJMOK   |
| 17 | NCS- | Cr | 3+ | 24 | 7  | 2.20 | 2.00 |  | GETMUO   |
| 17 | NCS- | Cr | 3+ | 24 | 7  | 2.71 | 1.99 |  | LUHWAM   |
| 17 | NCS- | Cr | 3+ | 24 | 7  | 2.68 | 2.01 |  | KADXAP   |
| 17 | NCS- | Cr | 3+ | 24 | 7  | 2.43 | 2.00 |  | NICHOC10 |
| 17 | NCS- | Mn | 2+ | 25 | 1  | 1.19 | 2.23 |  | GEGBOK   |
| 17 | NCS- | Mn | 2+ | 25 | 1  | 1.38 | 2.24 |  | XILJIM   |
| 17 | NCS- | Mn | 4+ | 25 |    | 1.22 | 2.22 |  | MUPSO1   |
| 17 | NCS- | Mn | 4+ | 25 |    | 1.17 | 2.23 |  | MUPSO2   |
| 17 | NCS- | Fe | 3+ | 26 | 6  | 1.54 | 2.09 |  | MIJMUN   |
| 17 | NCS- | Fe | 3+ | 26 | 6  | 1.75 | 2.06 |  | NEPSAC   |

|    |       |    |    |    |    |      |      |   |          |
|----|-------|----|----|----|----|------|------|---|----------|
| 17 | NCS-  | Fe | 3+ | 26 | 6  | 1.85 | 2.05 |   | TMFETC   |
| 17 | NCS-  | Fe | 3+ | 26 | 6  | 1.79 | 2.05 |   | TMFETC2  |
| 17 | NCS-  | Co | 2+ | 27 | 3  | 1.43 | 2.09 |   | BUQMIJ01 |
| 17 | NCS-  | Co | 2+ | 27 | 3  | 1.36 | 2.12 |   | KIPYUD   |
| 17 | NCS-  | Ni | 2+ | 28 | 2  | 1.25 | 2.09 |   | TIGGEW   |
| 17 | NCS-  | Ni | 2+ | 28 | 2  | 1.40 | 2.10 |   | BEZXIN   |
| 17 | NCS-  | Ni | 2+ | 28 | 2  | 1.37 | 2.09 |   | TOWCAJ   |
| 17 | NCS-  | Y  | 3+ | 39 |    | 3.22 | 2.33 |   | KAKQES   |
| 17 | NCS-  | Mo | 3+ | 42 | 11 | 4.15 | 2.08 |   | KMOITC   |
| 17 | NCS-  | Tc | 4+ | 43 |    | 4.39 | 2.00 |   | FEKWEX   |
| 17 | NCS-  | Re | 4+ | 75 | 16 | 5.08 | 2.02 |   | OGAKIR   |
| 17 | NCS-  | Re | 4+ | 75 | 16 | 5.11 | 2.07 |   | OGAKIR2  |
| 17 | NCS-  | Re | 4+ | 75 | 16 | 4.76 | 1.98 |   | XUCBON   |
| 17 | NCS-  | Os | 3+ | 76 |    | 4.36 | 2.02 |   | QIJJEY   |
| 17 | NCS-  | Os | 4+ | 76 |    | 4.40 | 2.01 |   | QIJJAU   |
| 17 | NCS-  | Os | 4+ | 76 |    | 4.40 | 2.01 |   | QIJJAU2  |
| 18 | ONO-  |    |    |    |    |      |      |   |          |
| 19 | CH3CN | V  | 2+ | 23 | 5  | 2.10 | 2.11 |   | BEQQIX   |
| 19 | CH3CN | Cr | 3+ | 24 | 7  | 2.00 | 2.00 |   | ACALEW   |
| 19 | CH3CN | Mn | 2+ | 25 | 1  | 2.21 | 2.22 |   | ZOTYAI   |
| 19 | CH3CN | Mn | 2+ | 25 | 1  | 2.12 | 2.19 |   | ZOTYAI2  |
| 19 | CH3CN | Fe | 2+ | 26 | 4  | 2.15 | 2.15 |   | ACEYOW   |
| 19 | CH3CN | Fe | 2+ | 26 | 4  | 2.17 | 2.16 |   | HIRTIL   |
| 19 | CH3CN | Fe | 2+ | 26 | 4  | 2.16 | 2.16 |   | HMCIFE15 |
| 19 | CH3CN | Co | 2+ | 27 | 3  | 2.11 | 2.11 |   | OCELIS   |
| 19 | CH3CN | Co | 2+ | 27 | 3  | 2.10 | 2.11 |   | JOYPUI   |
| 19 | CH3CN | Co | 2+ | 27 | 3  | 2.10 | 2.11 |   | OFINAT   |
| 19 | CH3CN | Ni | 2+ | 28 | 2  | 2.08 | 2.08 |   | FUJVAH   |
| 19 | CH3CN | Ni | 2+ | 28 | 2  | 2.07 | 2.07 |   | XUGBIK   |
| 19 | CH3CN | Ni | 2+ | 28 | 2  | 2.06 | 2.07 |   | OCELAK   |
| 19 | CH3CN | Tc | 2+ | 43 |    | 4.62 | 2.06 |   | TEQNAE   |
| 19 | CH3CN | Ru | 2+ | 44 |    | 4.54 | 2.09 |   | ACEYAI   |
| 19 | CH3CN | Ru | 2+ | 44 |    | 4.56 | 2.03 |   | PUHSOB   |
| 19 | CH3CN | Ru | 2+ | 44 |    | 4.87 | 2.01 |   | FEWRII   |
| 19 | CH3CN | Rh | 3+ | 45 | 12 | 4.44 | 1.99 |   | VENYAO   |
| 20 | py    | Fe | 2+ | 26 | 4  | 1.46 | 2.26 |   | PYFEFE   |
| 20 | py    | Ru | 2+ | 44 |    | 4.31 | 2.13 |   | HPYRUB   |
| 21 | NH3   | Cr | 3+ | 24 | 7  | 2.81 | 2.08 |   | LEBRUF   |
| 21 | NH3   | Mn | 2+ | 25 | 1  | 1.33 | 2.29 |   | PUHJIL   |
| 21 | NH3   | Co | 2+ | 27 | 3  | 2.51 | 1.87 |   | CAFWEM   |
| 21 | NH3   | Co | 2+ | 27 | 3  | 2.57 | 1.96 |   | OKOCAS   |
| 21 | NH3   | Co | 2+ | 27 | 3  | 1.48 | 2.17 |   | RAJNIZ   |
| 21 | NH3   | Co | 3+ | 27 | 9  | 2.88 | 1.97 |   | CANYAS   |
| 21 | NH3   | Co | 3+ | 27 | 9  | 2.95 | 1.96 |   | EYAQEA   |
| 21 | NH3   | Co | 3+ | 27 | 9  | 3.13 | 1.97 |   | XEDNAV   |
| 21 | NH3   | Ni | 2+ | 28 | 2  | 1.68 | 2.14 |   | BICSIQ   |
| 21 | NH3   | Ni | 2+ | 28 | 2  | 1.69 | 2.14 |   | NUHJUV   |
| 21 | NH3   | Rh | 3+ | 45 | 12 | 4.62 | 2.08 |   | XEDNEZ   |
| 21 | NH3   | Rh | 3+ | 45 | 12 | 4.57 | 2.07 |   | XEDNEZ2  |
| 21 | NH3   | Ir | 3+ | 77 | 15 | 4.99 | 2.10 |   | XEDNID   |
| 21 | NH3   | Ir | 3+ | 77 | 15 | 5.24 | 2.08 |   | XEDNID2  |
| 22 | en    | V  | 2+ | 23 | 5  | 2.10 | 2.20 | Δ | HIDMEM   |
| 22 | en    | Cr | 3+ | 24 | 7  | 2.75 | 2.08 | Λ | CRENTC   |
| 22 | en    | Cr | 3+ | 24 | 7  | 2.82 | 2.08 | Δ | ENDACR   |

|    |      |    |    |    |    |      |      |   |          |
|----|------|----|----|----|----|------|------|---|----------|
| 22 | en   | Cr | 3+ | 24 | 7  | 2.95 | 2.08 | △ | ETDHCO   |
| 22 | en   | Cr | 3+ | 24 | 7  | 2.87 | 2.08 | △ | GOZCIH   |
| 22 | en   | Mn | 2+ | 25 | 1  | 1.32 | 2.29 | △ | ASEBEF   |
| 22 | en   | Mn | 2+ | 25 | 1  | 1.48 | 2.27 | △ | KIBFUX   |
| 22 | en   | Mn | 2+ | 25 | 1  | 1.44 | 2.27 | △ | QIBZOR   |
| 22 | en   | Mn | 2+ | 25 | 1  | 1.38 | 2.28 | △ | RAGTOI   |
| 22 | en   | Fe | 2+ | 26 | 4  | 1.50 | 2.20 | △ | FEBMAB   |
| 22 | en   | Fe | 2+ | 26 | 4  | 1.59 | 2.21 | △ | LIWKOR01 |
| 22 | en   | Fe | 2+ | 26 | 4  | 1.51 | 2.22 | △ | RITKUA   |
| 22 | en   | Co | 2+ | 27 | 3  | 1.25 | 2.28 | △ | HIQYUC   |
| 22 | en   | Co | 2+ | 27 | 3  | 1.57 | 2.18 | △ | HOSPOV   |
| 22 | en   | Co | 2+ | 27 | 3  | 1.65 | 2.18 | △ | ICETEIQ  |
| 22 | en   | Co | 2+ | 27 | 3  | 1.64 | 2.17 | △ | JEQNEZ   |
| 22 | en   | Co | 2+ | 27 | 3  | 1.64 | 2.17 | △ | KIBGAE   |
| 22 | en   | Co | 3+ | 27 | 9  | 3.08 | 1.97 | △ | ABIXIT   |
| 22 | en   | Co | 3+ | 27 | 9  | 3.06 | 1.97 | △ | FIRQIH   |
| 22 | en   | Co | 3+ | 27 | 9  | 3.11 | 1.97 | △ | PERHIE   |
| 22 | en   | Co | 3+ | 27 | 9  | 3.22 | 1.97 | △ | TENCON   |
| 22 | en   | Co | 3+ | 27 | 9  | 3.09 | 1.97 | △ | WOQFAK   |
| 22 | en   | Ni | 2+ | 28 | 2  | 1.81 | 2.13 | △ | BINYAY   |
| 22 | en   | Ni | 2+ | 28 | 2  | 1.72 | 2.15 | △ | DASSUL   |
| 22 | en   | Ni | 2+ | 28 | 2  | 1.84 | 2.13 | △ | EFATOV   |
| 22 | en   | Ni | 2+ | 28 | 2  | 1.81 | 2.13 | △ | ENIACH   |
| 22 | en   | Ni | 2+ | 28 | 2  | 1.85 | 2.13 | △ | XAPNOS   |
| 22 | en   | Ru | 2+ | 44 |    | 3.84 | 2.13 | △ | BABRAX   |
| 22 | en   | Rh | 3+ | 45 | 12 | 4.49 | 2.09 | △ | AGUJIW   |
| 22 | en   | Rh | 3+ | 45 | 12 | 4.68 | 2.06 | △ | CRHENC   |
| 22 | en   | Rh | 3+ | 45 | 12 | 4.66 | 2.07 | △ | DARGUY   |
| 22 | en   | Rh | 3+ | 45 | 12 | 4.65 | 2.06 | △ | TENRHC   |
| 22 | en   | Os | 3+ | 76 |    | 5.25 | 2.11 | △ | FISFAO   |
| 22 | en   | Ir | 3+ | 77 | 15 | 5.12 | 2.10 | △ | UBEFEM   |
| 22 | en   | Ir | 3+ | 77 | 15 | 5.36 | 2.20 | △ | DARHAF   |
| 23 | bpy  | Cr | 2+ | 24 |    | 3.00 | 2.08 | △ | ACAYUZ   |
| 23 | bpy  | Cr | 3+ | 24 | 7  | 3.14 | 2.04 | △ | FERYEG   |
| 23 | bpy  | Cr | 3+ | 24 | 7  | 3.18 | 2.05 | △ | FERYEG2  |
| 23 | bpy  | Mn | 2+ | 25 | 1  | 1.73 | 2.24 | △ | GUXJOY   |
| 23 | bpy  | Fe | 2+ | 26 | 4  | 3.10 | 1.98 | △ | LIPXIS   |
| 23 | bpy  | Fe | 2+ | 26 | 4  | 3.12 | 1.98 | △ | LIPXIS2  |
| 23 | bpy  | Co | 2+ | 27 | 3  | 1.91 | 2.13 | △ | CAMHED   |
| 23 | bpy  | Co | 2+ | 27 | 3  | 2.04 | 2.12 | △ | CIBDOH   |
| 23 | bpy  | Co | 2+ | 27 | 3  | 3.28 | 1.93 | △ | IXODII   |
| 23 | bpy  | Co | 2+ | 27 | 3  | 3.38 | 1.93 | △ | IXODII2  |
| 23 | bpy  | Co | 3+ | 27 | 9  | 3.25 | 1.93 | △ | DUPPAG   |
| 23 | bpy  | Co | 3+ | 27 | 9  | 3.26 | 1.93 | △ | FIXKUT   |
| 23 | bpy  | Ni | 2+ | 28 | 2  | 2.12 | 2.09 | △ | AGADAO   |
| 23 | bpy  | Ni | 2+ | 28 | 2  | 2.26 | 2.08 | △ | AGADAO2  |
| 23 | bpy  | Ni | 3+ | 28 |    | 2.94 | 1.98 | △ | CUHVUW   |
| 23 | bpy  | Ru | 2+ | 44 |    | 4.89 | 2.05 | △ | AXAFIO   |
| 23 | bpy  | Rh | 3+ | 45 | 12 | 4.64 | 2.04 | △ | DIWGIZ   |
| 23 | bpy  | Rh | 3+ | 45 | 12 | 4.76 | 2.02 | △ | FERYIK   |
| 23 | bpy  | Rh | 3+ | 45 | 12 | 4.72 | 2.06 | △ | FERTIK2  |
| 23 | bpy  | Os | 2+ | 76 |    | 5.14 | 2.04 | △ | HIRDOB   |
| 23 | bpy  | Os | 2+ | 76 |    | 5.25 | 2.08 | △ | HIRDOB2  |
| 23 | bpy  | Ir | 3+ | 77 | 15 | 5.46 | 2.02 | △ | CEZMAV   |
| 24 | phen | V  | 3+ | 23 | 8  | 3.92 | 1.99 | △ | CEHBEX   |
| 24 | phen | Cr | 3+ | 24 | 7  | 3.15 | 2.05 | △ | LIYWUL   |
| 24 | phen | Mn | 2+ | 25 | 1  | 1.87 | 2.23 | △ | GUHGOF   |
| 24 | phen | Mn | 2+ | 25 | 1  | 1.50 | 2.25 | △ | LUHCAA   |
| 24 | phen | Fe | 2+ | 26 | 4  | 3.13 | 1.97 | △ | ADETIM   |
| 24 | phen | Fe | 2+ | 26 | 4  | 3.11 | 1.98 | △ | AFIRAJ   |
| 24 | phen | Fe | 2+ | 26 | 4  | 3.10 | 1.98 | △ | MIKJEW   |
| 24 | phen | Fe | 3+ | 26 | 6  | 3.09 | 1.98 | △ | BIPGEN   |
| 24 | phen | Fe | 3+ | 26 | 6  | 3.09 | 1.97 | △ | FUTDOO   |
| 24 | phen | Fe | 3+ | 26 | 6  | 3.19 | 1.97 | △ | SOGXOC   |
| 24 | phen | Co | 2+ | 27 | 3  | 1.94 | 2.13 | △ | AGOYIF   |
| 24 | phen | Co | 2+ | 27 | 3  | 3.17 | 1.94 | △ | BUYLIR   |
| 24 | phen | Co | 2+ | 27 | 3  | 3.19 | 1.94 | △ | HOCHFIP  |



|    |         |    |    |    |    |      |      |   |          |
|----|---------|----|----|----|----|------|------|---|----------|
| 24 | phen    | Co | 2+ | 27 | 3  | 1.93 | 2.13 | Δ | SALVEH   |
| 24 | phen    | Co | 3+ | 27 | 9  | 3.08 | 1.94 | Δ | KIWRIS   |
| 24 | phen    | Co | 3+ | 27 | 9  | 3.06 | 1.94 | Λ | KULRAL   |
| 24 | phen    | Co | 3+ | 27 | 9  | 2.99 | 1.94 | Δ | MOHFAR   |
| 24 | phen    | Ni | 2+ | 28 | 2  | 2.09 | 2.09 | Λ | FUHWEL   |
| 24 | phen    | Ni | 2+ | 28 | 2  | 2.07 | 2.09 | Δ | MODCAK   |
| 24 | phen    | Ni | 2+ | 28 | 2  | 2.07 | 2.09 | Λ | IYULIX   |
| 25 | SO32-   |    |    |    |    |      |      |   |          |
| 26 | NO2-    | Co | 3+ | 27 | 9  | 3.62 | 1.96 |   | WERKIN2  |
| 26 | NO2-    | Co | 3+ | 27 | 9  | 3.58 | 1.96 |   | WERKIN10 |
| 26 | NO2-    | Rh | 3+ | 45 | 12 | 5.83 | 2.03 |   | TEDDOV   |
| 26 | NO2-    | Rh | 3+ | 45 | 12 | 6.04 | 2.08 |   | TEDDOV2  |
| 27 | PPh3    |    |    |    |    |      |      |   |          |
| 28 | CN-     | Ti | 3+ | 22 |    | 3.85 | 2.18 |   | NAYWOZ   |
| 28 | CN-     | V  | 3+ | 23 | 8  | 3.72 | 2.14 |   | JEHBAA   |
| 28 | CN-     | Cr | 3+ | 24 | 7  | 3.86 | 2.07 |   | BIJZOK   |
| 28 | CN-     | Cr | 3+ | 24 | 7  | 3.99 | 2.08 |   | AFOVIA   |
| 28 | CN-     | Cr | 3+ | 24 | 7  | 4.03 | 2.08 |   | COLHIU   |
| 28 | CN-     | Cr | 3+ | 24 | 7  | 4.00 | 2.08 |   | ELONUO   |
| 28 | CN-     | Mn | 3+ | 25 |    | 4.33 | 2.01 |   | BIFZOG   |
| 28 | CN-     | Mn | 3+ | 25 |    | 4.22 | 2.02 |   | KAHKIN   |
| 28 | CN-     | Fe | 3+ | 26 | 6  | 4.56 | 1.93 |   | BIWYOW   |
| 28 | CN-     | Fe | 3+ | 26 | 6  | 4.66 | 1.94 |   | FETGIV   |
| 28 | CN-     | Fe | 2+ | 26 | 4  | 4.87 | 1.95 |   | CEJYEV   |
| 28 | CN-     | Fe | 2+ | 26 | 4  | 5.05 | 1.91 |   | EYIQUY   |
| 28 | CN-     | Fe | 2+ | 26 | 4  | 4.87 | 1.93 |   | FAWNOH   |
| 28 | CN-     | Fe | 2+ | 26 | 4  | 5.04 | 1.90 |   | GIJVEA   |
| 28 | CN-     | Co | 3+ | 27 | 9  | 5.02 | 1.88 |   | AENCOC   |
| 28 | CN-     | Co | 3+ | 27 | 9  | 4.93 | 1.89 |   | DIENCO   |
| 28 | CN-     | Co | 3+ | 27 | 9  | 4.86 | 1.90 |   | HIGZAY   |
| 28 | CN-     | Co | 3+ | 27 | 9  | 4.77 | 1.90 |   | PEHACO   |
| 28 | CN-     | Mo | 4+ | 42 |    | 6.80 | 2.90 |   | HITPOQ   |
| 28 | CN-     | Ru | 2+ | 44 |    | 6.76 | 2.03 |   | QEZYAV   |
| 28 | CN-     | Ru | 2+ | 44 |    | 6.99 | 2.03 |   | WUGSEW   |
| 28 | CN-     | Ru | 3+ | 44 | 13 | 6.60 | 2.05 |   | KAGLAG   |
| 28 | CN-     | Os | 3+ | 76 |    | 7.07 | 2.05 |   | OCIJIU   |
| 28 | CN-     | Os | 3+ | 76 |    | 7.04 | 2.07 |   | OCIJIU2  |
| 28 | CN-     | Pt | 4+ | 78 | 17 | 6.76 | 2.02 |   | YASNUC   |
| 28 | CN-     | Pt | 4+ | 78 | 17 | 6.81 | 1.99 |   | COZVAO   |
| 29 | CO      | Fe | 2+ | 26 | 4  | 4.94 | 1.91 |   | CEHHON   |
| 29 | CO      | Fe | 2+ | 26 | 4  | 4.93 | 1.91 |   | HOLMIE   |
| 29 | CO      | Fe | 2+ | 26 | 4  | 4.95 | 1.91 |   | HOLMOK   |
| 29 | CO      | Ru | 2+ | 44 |    | 6.82 | 2.02 |   | LARPAW   |
| 29 | CO      | Ru | 2+ | 44 |    | 6.59 | 2.04 |   | LARPIE   |
| 29 | CO      | Os | 2+ | 76 |    | 8.25 | 2.00 |   | CEHHIH   |
| 29 | CO      | Os | 2+ | 76 |    | 7.96 | 2.02 |   | LARPEA   |
| 29 | CO      | Os | 2+ | 76 |    | 7.89 | 2.03 |   | LARPOK   |
| 29 | CO      | Ir | 3+ | 77 | 15 | 7.26 | 2.03 |   | XOLYIG   |
|    | glycine | V  | 3+ | 23 | 8  | 2.62 | 2.05 | Δ | AGASIL   |
|    | glycine | Cr | 3+ | 24 | 7  | 2.51 | 2.02 | Λ | TGLYCR   |
|    | glycine | Co | 3+ | 27 | 9  | 2.60 | 1.93 | Λ | AVUWET   |
|    | glycine | Co | 3+ | 27 | 9  | 2.73 | 1.92 | Δ | SEZMEQ   |
|    | urea    | Ti | 3+ | 22 |    | 2.80 | 2.01 |   | TIUREA01 |
|    | urea    | Cr | 3+ | 24 | 7  | 2.13 | 1.97 |   | DAPFEF   |
|    | urea    | Cr | 3+ | 24 | 7  | 2.24 | 1.97 |   | COLHIU   |

|  |      |    |    |    |   |      |      |  |          |
|--|------|----|----|----|---|------|------|--|----------|
|  | urea | Cr | 3+ | 24 | 7 | 2.14 | 1.97 |  | HOHPOJ   |
|  | urea | Cr | 3+ | 24 | 7 | 2.02 | 1.97 |  | HOHPUP   |
|  | urea | Mn | 2+ | 25 | 1 | 1.05 | 2.18 |  | WITQAR   |
|  | urea | Mn | 3+ | 25 |   | 1.93 | 1.99 |  | BOPWEI   |
|  | urea | Fe | 2+ | 26 | 4 | 1.56 | 1.99 |  | WITQEV   |
|  | urea | Fe | 3+ | 26 | 6 | 1.77 | 1.99 |  | MANJIU   |
|  | urea | Co | 2+ | 27 | 3 | 1.21 | 2.11 |  | COLLAQ01 |
|  | urea | Co | 2+ | 27 | 3 | 1.24 | 2.10 |  | RUBLEG   |
|  | urea | Co | 2+ | 27 | 3 | 1.19 | 2.09 |  | WITLIU   |
|  | urea | Ni | 2+ | 28 | 2 | 1.33 | 2.06 |  | ADUFEK   |

| CSD Reference Code | References                                                                                                                                                         |
|--------------------|--------------------------------------------------------------------------------------------------------------------------------------------------------------------|
| ABIXIT             | Xin He, Ping Zhang, Tian-You Song, Zhong-Cheng Mu, Jie-Hui Yu, Yue Wang, Jia-Ning Xu, Polyhedron (2004), 23, 2153, doi:10.1016/j.poly.2004.06.010                  |
| ACALEW             | O.Hatlevik, A.M.Arif, J.S.Miller, J.Phys.Chem.Solids (2004), 65, 61, doi:10.1016/j.jpss.2003.08.020                                                                |
| ACAYUZ             | J.Breu, A.Zwicknagel, Z.Naturforsch.,B:Chem.Sci. (2004), 59, 1015                                                                                                  |
| ACEYAI             | A.Anzellotti, A.Briceno, Acta Crystallogr.,Sect.E:Struct.Rep.Online (2001), 57, m538, doi:10.1107/S1600536801017469                                                |
| ACEYOW             | W.W.Brennessel, N.R.Brooks, M.P.Mehn, L.Que Junior, V.G.Young Junior, Acta Crystallogr.,Sect.E:Struct.Rep.Online (2001), 57, m545, doi:10.1107/S1600536801017585   |
| ADETIM             | Bing Yan, Zhi-Da Chen, Shi-Xi Wang, J.Chin.Chem.Soc.(Taipei) (2000), 47, 1211                                                                                      |
| ADOSOC             | A.B.Ali, Minh Trang Dang, J.-M.Greneche, A.Hemon-Ribaud, M.LebLANC, V.Maisonneuve, J.Solid State Chem. (2007), 180, 1911, doi:10.1016/j.jssc.2007.03.030           |
| ADUFEK             | E.V.Rybak-Akimova, S.Kryatov, P.D.Robinson, Private Communication (2002)                                                                                           |
| AENCOC             | Y.Kanazawa, T.Matsumoto, Acta Crystallogr.,Sect.B:Struct.Crystallogr.Cryst.Chem. (1976), 32, 282, doi:10.1107/S0567740876002793                                    |
| AFIRAJ             | Zhan-Xian Li, Ming-Ming Yu, Yu-Na Zhang, Liu-He Wei, Acta Crystallogr.,Sect.E:Struct.Rep.Online (2008), 64, m1514                                                  |
| AFOVIA             | Bing Yan, Shi Xi Wang, Zhi Da Chen, J.Coord.Chem. (2002), 55, 573, doi:10.1080/00958970290020883                                                                   |
| AGADAO             | T.Korzeniak, C.Mathoniere, A.Kaiba, P.Guionneau, M.Koziel, B.Sieklucka, Inorg.Chim.Acta (2008), 361, 3500, doi:10.1016/j.ica.2008.03.001                           |
| AGADAO2            | T.Korzeniak, C.Mathoniere, A.Kaiba, P.Guionneau, M.Koziel, B.Sieklucka, Inorg.Chim.Acta (2008), 361, 3500, doi:10.1016/j.ica.2008.03.001                           |
| AGASIL             | F.H.Fry, B.Dougan, N.McCann, A.C.Willis, C.J.Ziegler, N.E.Brasch, Inorg.Chim.Acta (2008), 361, 2321, doi:10.1016/j.ica.2007.11.025                                 |
| AGOYIF             | D.J.Harding, P.Harding, H.Adams, Acta Crystallogr.,Sect.E:Struct.Rep.Online (2008), 64, m1538, doi:10.1107/S1600536808036611                                       |
| AGUJIW             | H.J.van der Westhuizen, A.Roodt, R.Meijboom, Polyhedron (2010), 29, 470, doi:10.1016/j.poly.2009.06.030                                                            |
| AHUNEW             | S.Noro, S.Kitagawa, Stud.Surf.Sci.Catal. (2002), 141, 363                                                                                                          |
| AKCLPT             | G.G.Dodson, D.Hall, Acta Crystallogr. (1966), 20, 42, doi:10.1107/S0365110X66000082                                                                                |
| AMITAR             | Hai-Liang Zhu, Dong-Sheng Xia, Qing-Fu Zeng, Zao-Gui Wang, Da-Qi Wang, Acta Crystallogr.,Sect.E:Struct.Rep.Online (2003), 59, m1020, doi:10.1107/S160053680302316X |
| ARABEA             | H.Akutsu, A.Akutsu-Sato, S.S.Turner, P.Day, E.Canadell, S.Firth, R.J.H.Clark, J.Yamada, S.Nakatsuji, Chem.Commun. (2004), 18, doi:10.1039/b310683g                 |
| ASAWOH             | I.Stein, U.Ruschewitz, Z.Naturforsch.,B:Chem.Sci. (2011), 66, 471                                                                                                  |
| ASEBEF             | Ding-Xian Jia, Yong Zhang, Jie Dai, Qin-Yu Zhu, Xiao-Mei Gu, Z.Anorg.Allg.Chem. (2004), 630, 313, doi:10.1002/zaac.200300327                                       |
| ASOVEJ             | D.Chopra, P.Dagur, A.S.Prakash, T.N.Guru Row, M.S.Hegde, Acta Crystallogr.,Sect.E:Struct.Rep.Online (2004), 60, m348, doi:10.1107/S1600536804004337                |
| ASUDIB             | Ji-Wei Liu, Li-Hua Huo, Shan Gao, S.W.Ng, Acta Crystallogr.,Sect.E:Struct.Rep.Online (2004), 60, m439, doi:10.1107/S160053680400594X                               |
| AVUWET             | Xiao-Jun Zhao, Miao Du, Ying Wang, Xian-He Bu, J.Mol.Struct. (2004), 692, 155, doi:10.1016/j.molstruc.2004.01.025                                                  |
| AXAFIO             | F.Pointillart, C.Train, M.Grusselle, F.Villain, H.W.Schmalle, D.Talbot, P.Gredin, S.Decurtins, M.Verdaguer, Chem.Mater. (2004), 16, 832, doi:10.1021/cm020330d     |
| AYOLUV             | R.Gonzalez, R.Chiozzzone, C.Kremer, F.Guerra, G.De Munno, F.Lloret, M.Julve, J.Faus, Inorg.Chem. (2004), 43, 3013, doi:10.1021/ic030302c                           |
| AYOMAC             | R.Gonzalez, R.Chiozzzone, C.Kremer, F.Guerra, G.De Munno, F.Lloret, M.Julve, J.Faus, Inorg.Chem. (2004), 43, 3013, doi:10.1021/ic030302c                           |
| AYOMEG             | R.Gonzalez, R.Chiozzzone, C.Kremer, F.Guerra, G.De Munno, F.Lloret, M.Julve, J.Faus, Inorg.Chem. (2004), 43, 3013, doi:10.1021/ic030302c                           |
| AZELEW             | A.N.Chekhlov, Zh.Neorg.Khim.(Russ.)(Russ.J.Inorg.Chem.) (2004), 49, 35                                                                                             |
| AZELEW2            | A.N.Chekhlov, Zh.Neorg.Khim.(Russ.)(Russ.J.Inorg.Chem.) (2004), 49, 35                                                                                             |
| BABRAX             | P.J.Smolenaers, J.K.Beattie, N.D.Hutchinson, Inorg.Chem. (1981), 20, 2202, doi:10.1021/ic50221a052                                                                 |
| BARMAJ             | S.Rannabauer, W.Schnick, Z.Naturforsch.,B:Chem.Sci. (2003), 58, 410                                                                                                |
| BARWIB             | C.Hagfeldt, V.Kessler, I.Persson, New J.Chem. (2003), 27, 850, doi:10.1039/b210969g                                                                                |
| BAVYOM             | P.Knuuttila, Inorg.Chim.Acta (1981), 52, 141, doi:10.1016/S0020-1693(00)88588-6                                                                                    |
| BDASTA             | M.G.B.Drew, A.P.Wolters, J.D.Wilkins, Acta Crystallogr.,Sect.B:Struct.Crystallogr.Cryst.Chem. (1975), 31, 324, doi:10.1107/S0567740875002671                       |
| BEMPEO             | S.S.Turner, P.Day, K.M.Abdul Malik, M.B.Hursthouse, S.J.Teate, E.J.MacLean, L.Martin, S.A.French, Inorg.Chem. (1999), 38, 3543, doi:10.1021/ic990102u              |
| BENBIG             | C.Nguyen-Trung, J.C.Bryan, D.A.Palmer, Struct.Chem. (2004), 15, 89, doi:10.1023/B:STUC.0000011243.10406.8b                                                         |
| BEQQIX             | Z.Janas, L.B.Jerzykiewicz, S.Przybylak, R.L.Richards, P.Sobota, Organometallics (2000), 19, 4252, doi:10.1021/om000301h                                            |
| BEYNUP             | R.Haiges, J.A.Boatz, S.Schneider, T.Schroer, M.Yousufuddin, K.O.Christe, Angew.Chem.,Int.Ed. (2004), 43, 3148, doi:10.1002/anie.200454156                          |
| BEZXIN             | D.W.Hoffman, J.S.Wood, Cryst.Struct.Comm. (1982), 11, 691                                                                                                          |
| BIBRIN             | B.Viossat, A.Hourfar, N.Rodier, Bull.Soc.Chim.Fr. (1981), 454-1                                                                                                    |
| BICSIQ             | B.Paul, C.Nather, B.Walfort, K.M.Fromm, B.Zimmermann, H.Lang, C.Janiak, CrystEngComm (2004), 6, 293, doi:10.1039/b410933c                                          |
| BIFZOG             | M.D.Ward, Private Communication (2003)                                                                                                                             |
| BIJZOK             | M.Flores-Alamo, M.E.Sosa-Torres, R.A.Toscano, E.Camarillo, J.M.Hernandez, H.Murrieta, Inorg.Chem.Comm. (2004), 7, 1087, doi:10.1016/j.inoche.2004.07.021           |
| BINYAY             | D.J.Chesnut, R.C.Haushalter, J.Zubieta, Inorg.Chim.Acta (1999), 292, 41, doi:10.1016/S0020-1693(99)00168-1                                                         |
| BIPGEN             | M.Odoko, N.Okabe, Acta Crystallogr.,Sect.E:Struct.Rep.Online (2004), 60, m1822, doi:10.1107/S1600536804027345                                                      |

|          |                                                                                                                                                                         |
|----------|-------------------------------------------------------------------------------------------------------------------------------------------------------------------------|
| BIWYOW   | A.Nakajima, S.Itoh, M.Kurihara, M.Sakamoto, D.Yoshioka, M.Mikuriya, S.Hamakawa, F.Mizukami, <i>Inorg.Chem.Commun.</i> (2008), 11, 323, doi:10.1016/j.inoche.2007.12.026 |
| BONPEZ   | P.Bernhard, H.-B.Burgi, J.Hauser, H.Lehmann, A.Ludi, <i>Inorg.Chem.</i> (1982), 21, 3936, doi:10.1021/ic00141a016                                                       |
| BONPID   | P.Bernhard, H.-B.Burgi, J.Hauser, H.Lehmann, A.Ludi, <i>Inorg.Chem.</i> (1982), 21, 3936, doi:10.1021/ic00141a016                                                       |
| BOPWEI   | H.Aghabozorg, G.J.Palenik, R.C.Stouffer, J.Summers, <i>Inorg.Chem.</i> (1982), 21, 3903, doi:10.1021/ic00141a009                                                        |
| BUCBAC   | G.Uhl, E.Hey, G.Becker, F.Weller, K.Dehnicke, <i>Z.Anorg.Allg.Chem.</i> (1983), 497, 213, doi:10.1002/zaac.19834970221                                                  |
| BULVAF   | M.B.Cingi, A.M.M.Lanfredi, A.Tiripicchio, J.G.Haasnoot, J.Reedijk, <i>Inorg.Chim.Acta</i> (1983), 72, 81, doi:10.1016/S0020-1693(00)81699-0                             |
| BUQMIJ01 | Sheng-Zhi Hu, <i>Jiegou Huaxue(Chin.J.Struct.Chem.)</i> (1999), 18, 476                                                                                                 |
| BUQMOP   | S.K.Ng, Sheng-Zhi Hu, <i>Wuli Huaxue Xuebao(Chin.)(Acta Phys.-Chim.Sin)</i> (2000), 16, 804                                                                             |
| BUYLIR   | Jian-Hong Bi, Wen-Tao Bi, Zi-Xian Huang, Nai-Liang Hu, <i>Asian J.Chem.</i> (2009), 21, 6622                                                                            |
| CAFWEM   | Yingjie Zhang, D.Collison, F.R.Livens, M.Helliwell, F.Heatley, A.K.Powell, S.Wocadlo, H.Eccles, <i>Polyhedron</i> (2002), 21, 81, doi:10.1016/S0277-5387(01)00965-2     |
| CAMHED   | D.J.Szalda, C.Creutz, D.Mahajan, N.Sutin, <i>Inorg.Chem.</i> (1983), 22, 2372, doi:10.1021/ic00159a007                                                                  |
| CANYAS   | R.P.Sharma, R.Bala, R.Sharma, B.M.Kariuki, U.Rychlewska, B.Warzajtis, <i>J.Mol.Struct.</i> (2005), 748, 143, doi:10.1016/j.molstruc.2005.03.028                         |
| CAZCIP   | H.Okazaki, <i>J.Sci.Hiroshima Univ,A</i> (1983), 47, 1                                                                                                                  |
| CEHBEX   | Jing Lu, De-Qing Chu, Jie-Hui Yu, Xiao Zhang, Ming-Hui Bi, Ji-Qing Xu, Xiao-Yang Yu, Qing-Feng Yang, <i>Inorg.Chim.Acta</i> (2006), 359, 2495                           |
| CEHHIH   | M.Finze, E.Bernhardt, H.Willner, C.W.Lehmann, F.Aubke, <i>Inorg.Chem.</i> (2005), 44, 4206                                                                              |
| CEHHON   | M.Finze, E.Bernhardt, H.Willner, C.W.Lehmann, F.Aubke, <i>Inorg.Chem.</i> (2005), 44, 4206                                                                              |
| CEJYEV   | I.A.Razak, S.S.S.Raj, H.-K.Fun, Y.-X.Tong, Z.-L.Lu, B.-S.Kang, <i>Acta Crystallogr.,Sect.C:Cryst.Struct.Commun.</i> (2000), 56, 291, doi:10.1107/S01082701199015176     |
| CEMXXU   | P.Lindqvist-Reis, I.Persson, M.Sandstrom, <i>Dalton Trans.</i> (2006), 3868, doi:10.1039/b604267h                                                                       |
| CEXREC   | E.E.Kim, K.Eriks, R.Magnuson, <i>Inorg.Chem.</i> (1984), 23, 393, doi:10.1021/ic00172a003                                                                               |
| CEXRIG   | E.E.Kim, K.Eriks, R.Magnuson, <i>Inorg.Chem.</i> (1984), 23, 393, doi:10.1021/ic00172a003                                                                               |
| CEYCEO   | M.Ramos Silva, A.Matos Beja, J.A.Paixao, L.Alte da Veiga, J.Martin-Gil, <i>Z.Kristallogr.-New Cryst.Struct.</i> (1999), 214, 477                                        |
| CEZMAV   | A.C.Hazell, R.G.Hazell, <i>Acta Crystallogr.,Sect.C:Cryst.Struct.Commun.</i> (1984), 40, 806, doi:10.1107/S0108270184005801                                             |
| CIBDOH   | C.D.Papadopoulos, A.G.Hatzidimitriou, G.P.Voutsas, A.Lalia-Kantouri, <i>Polyhedron</i> (2007), 26, 1077, doi:10.1016/j.poly.2006.09.084                                 |
| CIMFEJ   | J.Baldas, J.Bonnyman, D.L.Samuels, G.A.Williams, <i>Acta Crystallogr.,Sect.C:Cryst.Struct.Commun.</i> (1984), 40, 1343, doi:10.1107/S0108270184007903                   |
| CITDAK   | P.Knuutila, <i>Polyhedron</i> (1984), 3, 303, doi:10.1016/S0277-5387(00)88112-7                                                                                         |
| COLHIU   | B.N.Figgis, E.S.Kucharski, J.M.Patrick, A.H.White, <i>Aust.J.Chem.</i> (1984), 37, 265                                                                                  |
| COLHIU   | B.N.Figgis, E.S.Kucharski, J.M.Patrick, A.H.White, <i>Aust.J.Chem.</i> (1984), 37, 265                                                                                  |
| COLLAQ01 | Kh.Suleimanov, A.S.Antsyshkina, V.Ya.Dudarev, L.V.Fykin, M.A.Porai-Koshits, <i>Koord.Khim.(Russ.)(Coord.Chem.)</i> (1984), 10, 1272                                     |
| COLNUM   | F.A.Cotton, C.K.Fair, G.E.Lewis, G.N.Mott, F.K.Ross, A.J.Schultz, J.M.Williams, <i>J.Am.Chem.Soc.</i> (1984), 106, 5319, doi:10.1021/ja00330a047                        |
| COLWUV   | A.N.Shnulin, G.N.Nadzhafov, Kh.S.Mamedov, <i>Zh.Strukt.Khim.(Russ.)(J.Struct.Chem.)</i> (1984), 25, 91-3                                                                |
| COZVAO   | A.I.Yanovsky, Kh.Kh.Vaskes, A.V.Babkov, M.Yu.Antipin, Yu.T.Struchkov, <i>Koord.Khim.(Russ.)(Coord.Chem.)</i> (1984), 10, 1706                                           |
| CRENTC   | C.Brouty, P.Spinat, A.Whuler, P.Herpin, <i>Acta Crystallogr.,Sect.B:Struct.Crystallogr.Cryst.Chem.</i> (1977), 33, 1913, doi:10.1107/S0567740877007316                  |
| CRHENC   | A.Whuler, C.Brouty, P.Spinat, P.Herpin, <i>Acta Crystallogr.,Sect.B:Struct.Crystallogr.Cryst.Chem.</i> (1976), 32, 2542, doi:10.1107/S0567740876008194                  |
| CROXKH   | D.Taylor, <i>Aust.J.Chem.</i> (1978), 31, 1455                                                                                                                          |
| CUHVUW   | D.J.Szalda, D.H.Macartney, N.Sutin, <i>Inorg.Chem.</i> (1984), 23, 3473, doi:10.1021/ic00190a009                                                                        |
| DALLIL   | U.Demant, E.Conradi, U.Muller, K.Dehnicke, <i>Z.Naturforsch.,B:Chem.Sci.</i> (1985), 40, 443                                                                            |
| DAPFEF   | V.I.Bondar, S.P.Rozman, K.A.Potekhin, V.G.Rau, Yu.T.Struchkov, <i>Dokl.Akad.Nauk SSSR(Russ.)(Proc.Nat.Acad.Sci.USSR)</i> (1984), 279, 373                               |
| DARGUY   | S.K.Hoffmann, D.J.Hodgson, W.E.Hatfield, <i>Inorg.Chem.</i> (1985), 24, 1194, doi:10.1021/ic00202a017                                                                   |
| DARHAF   | S.K.Hoffmann, D.J.Hodgson, W.E.Hatfield, <i>Inorg.Chem.</i> (1985), 24, 1194, doi:10.1021/ic00202a017                                                                   |
| DASSUL   | S.M.Zemskova, L.A.Glinskaya, R.F.Klevtsova, M.A.Fedotov, S.V.Larionov, <i>Zh.Strukt.Khim.(Russ.)(J.Struct.Chem.)</i> (1999), 40, 340                                    |
| DAZVUV   | H.Okazaki, Y.Kushi, H.Yoneda, <i>J.Am.Chem.Soc.</i> (1985), 107, 4183, doi:10.1021/ja00300a017                                                                          |
| DEBLEB   | A.Herbowski, T.Lis, <i>Polyhedron</i> (1985), 4, 127, doi:10.1016/S0277-5387(00)84232-1                                                                                 |
| DEDNAC   | N.F.Stephens, P.Lightfoot, <i>Solid State Sciences</i> (2006), 8, 197, doi:10.1016/j.solidstatesciences.2005.08.024                                                     |
| DEFWOB   | Hui Zhang, Pu Chen, Liang Fang, <i>Acta Crystallogr.,Sect.E:Struct.Rep.Online</i> (2006), 62, m658, doi:10.1107/S1600536806006751                                       |
| DIENCO   | M.Konno, F.Marumo, Y.Saito, <i>Acta Crystallogr.,Sect.B:Struct.Crystallogr.Cryst.Chem.</i> (1973), 29, 739, doi:10.1107/S0567740873003274                               |
| DIJRUK   | M.Jakonen, P.Hirva, T.Nivajarvi, M.Kallinen, M.Haukka, <i>Eur.J.Inorg.Chem.</i> (2007), 3497, doi:10.1002/ejic.200700341                                                |
| DILCIL   | Yin-Qiu Liu, Xi-Rui Zeng, <i>Acta Crystallogr.,Sect.E:Struct.Rep.Online</i> (2007), 63, m2414, doi:10.1107/S1600536807041190                                            |
| DITFER   | N.Bulc, L.Golic, J.Siftar, <i>Vestn.Slov.Kem.Drus.(Bull.Slovenian Chem.Soc.)</i> (1985), 32, 221                                                                        |
| DIWGIZ   | B.Hubesch, B.Mahieu, J.Meunier-Piret, <i>Bull.Soc.Chim.Belg.</i> (1985), 94, 685                                                                                        |
| DODDOP   | I.I.Zviedre, V.K.Bel'skii, E.M.Shvarts, <i>Latv.PSR Zinat.Akad.Vestis,Khim.Ser.</i> (1985), 672                                                                         |
| DOMTII   | P.E.Kazin, V.K.Bel'skii, A.I.Zhirov, N.A.Subbotina, M.G.Felin, V.V.Zelentsov, V.I.Spitsin, <i>Zh.Neorg.Khim.(Russ.)(Russ.J.Inorg.Chem.)</i> (1985), 30, 1426            |
| DUKNOM   | R.Faure, G.Duc, J.-P.Deloume, <i>Acta Crystallogr.,Sect.C:Cryst.Struct.Commun.</i> (1986), 42, 982, doi:10.1107/S0108270186093794                                       |
| DUPPAG   | Qian Jun, Chi Zhang, <i>Acta Crystallogr.,Sect.E:Struct.Rep.Online</i> (2010), 66, m12, doi:10.1107/S1600536809051654                                                   |
| ECANAY   | J.Yamada, K.Fujimoto, H.Akutsu, S.Nakatsuji, H.Nishikawa, K.Kikuchi, <i>Synth.Met.</i> (2005), 153, 373, doi:10.1016/j.synthmet.2005.07.309                             |
| EFATOV   | Yan-Si Jiang, Hua-Gang Yao, Shou-Hua Ji, Min Ji, Yong-Lin An, <i>Inorg.Chem.</i> (2008), 47, 3922, doi:10.1021/ic7025158                                                |

|          |                                                                                                                                                                                     |
|----------|-------------------------------------------------------------------------------------------------------------------------------------------------------------------------------------|
| EGUKIB   | M.B.Hursthouse, R.L.Short, Private Communication (2003)                                                                                                                             |
| EJATEO   | K.Abu-Shandi, H.Winkler, Biao Wu, C.Janiak, CrystEngComm (2003), 5, 180, doi:10.1039/b303498d                                                                                       |
| ELONUO   | Bei-Chuan Zhou, Hui-Zhong Kou, Yi He, Ru-Ji Wang, Ya-Dong Li, Hong-Gen Wang, Chin.J.Chem. (2003), 21, 352                                                                           |
| EMUCOE   | D.B.Soria, J.Grundy, M.P.Coles, P.B.Hitchcock, Polyhedron (2003), 22, 2731, doi:10.1016/S0277-5387(03)00364-4                                                                       |
| EMUVOX   | Da-Cheng Li, Jian-Min Dou, Ke-Ying Ding, Da-Qi Wang, Mei-Ju Niu, Ying Liu, Huaxue Xuebao(Chin.)(Acta Chim.Sinica) (2003), 61, 110                                                   |
| ENDACR   | C.Brouty, P.Spinat, A.Whuler, Acta Crystallogr.,Sect.B:Struct.Crystallogr.Cryst.Chem. (1977), 33, 3453, doi:10.1107/S0567740877011182                                               |
| ENIACH   | R.E.Cramer, W.van Doorne, J.T.Huneke, Inorg.Chem. (1976), 15, 529, doi:10.1021/ic50157a009                                                                                          |
| ENIDAG   | E.Kahrovic, P.Orioli, B.Bruni, M.Di Vaira, L.Messori, Inorg.Chim.Acta (2003), 355, 420, doi:10.1016/S0020-1693(03)00312-8                                                           |
| ENIDUA   | A.Mayboroda, B.Walfort, G.Rheinwald, H.Lang, Inorg.Chim.Acta (2003), 355, 438, doi:10.1016/S0020-1693(03)00347-5                                                                    |
| ETDHCO   | K.N.Raymond, J.A.Ibers, Inorg.Chem. (1968), 7, 2333, doi:10.1021/ic50069a031                                                                                                        |
| EYAQEA   | R.P.Sharma, R.Bala, R.Sharma, P.Venugopalan, J.Mol.Struct. (2004), 694, 229, doi:10.1016/j.molstruc.2004.03.040                                                                     |
| EYIQUY   | J.Kuchar, J.Cernak, W.Massa, Acta Crystallogr.,Sect.C:Cryst.Struct.Comm. (2004), 60, m418, doi:10.1107/S0108270104014581                                                            |
| FAMVUK10 | O.S.Filipenko, D.D.Makitova, O.N.Krasochka, V.I.Ponomarev, L.O.Atovmyan, Koord.Khim.(Russ.)(Coord.Chem.) (1987), 13, 669                                                            |
| FAWNOH   | Hai-Ying Bie, Jing Lu, Jie-Hui Yu, Ying-Hua Sun, Xiao Zhang, Ji-Qing Xu, Ling-Yun Pan, Qing-Xin Yang, J.Coord.Chem. (2004), 57, 1603, doi:10.1080/00958970412331310536              |
| FEACIT   | J.Strouse, S.W.Layten, C.E.Strouse, J.Am.Chem.Soc. (1977), 99, 562, doi:10.1021/ja00444a041                                                                                         |
| FEBHIE   | B.Neumuller, K.Dehnicke, Z.Anorg.Allg.Chem. (2004), 630, 2576, doi:10.1002/zaac.200400370                                                                                           |
| FEBMAB   | Ming-Lai Fu, Guo-Cong Guo, Xi Liu, Bin Liu, Li-Zhen Cai, Jin-Shun Huang, Inorg.Chem.Comm. (2005), 8, 18, doi:10.1016/j.inoche.2004.10.021                                           |
| FEKWEX   | G.A.Williams, J.Bonnyman, J.Baldas, Aust.J.Chem. (1987), 40, 27                                                                                                                     |
| FEMHOV   | P.L.W.Tregenna-Piggott, D.Spichiger, G.Carver, B.Frey, R.Meier, H.Weihe, J.A.Cowan, G.J.McIntyre, G.Zahn, A.-L.Barra, Inorg.Chem. (2004), 43, 8049, doi:10.1021/ic0492921           |
| FEPCOS   | E.H.Merrachi, B.F.Mentzen, F.Chassagneux, Rev.Chim.Miner. (1986), 23, 329                                                                                                           |
| FEPHOX   | A.Castineiras, W.Hiller, J.Strahle, A.Sousa, A.Rodriguez, R.Bastida, A.Sanchez-Bermudez, Acta Crystallogr.,Sect.C:Cryst.Struct.Comm. (1987), 43, 423, doi:10.1107/S0108270187095520 |
| FERTIK2  | A.Hauser, M.Mader, W.T.Robinson, R.Murugesan, J.Ferguson, Inorg.Chem. (1987), 26, 1331, doi:10.1021/ic00255a027                                                                     |
| FERYEG   | A.Hauser, M.Mader, W.T.Robinson, R.Murugesan, J.Ferguson, Inorg.Chem. (1987), 26, 1331, doi:10.1021/ic00255a027                                                                     |
| FERYEG2  | K.V.Goodwin, W.T.Pennington, J.D.Petersen, Inorg.Chem. (1989), 28, 2016, doi:10.1021/ic00309a051                                                                                    |
| FERYIK   | A.Hauser, M.Mader, W.T.Robinson, R.Murugesan, J.Ferguson, Inorg.Chem. (1987), 26, 1331, doi:10.1021/ic00255a027                                                                     |
| FETGIV   | J.Overgaard, H.Svendsen, M.A.Chevalier, B.B.Iversen, Acta Crystallogr.,Sect.E:Struct.Rep.Online (2005), 61, m268, doi:10.1107/S1600536805011360                                     |
| FEWGET   | D.D.Makitova, O.N.Krasochka, L.O.Atovmyan, I.P.Lavrent'ev, Yu.M.Shul'ga, L.V.Revenko, M.L.Khidekel, Koord.Khim.(Russ.)(Coord.Chem.) (1987), 13, 383                                 |
| FEWRII   | M.Brown, X.L.R.Fontaine, N.N.Greenwood, J.D.Kennedy, M.Thornton-Pett, J.Chem.Soc.,Dalton Trans. (1987), 1169, doi:10.1039/dt9870001169                                              |
| FIKGAH   | S.Brownstein, E.Gabe, B.Irish, F.Lee, B.Louie, A.Piotrowski, Can.J.Chem. (1987), 65, 445                                                                                            |
| FIPDEO   | S.Rabe, W.Bubenheim, U.Muller, Z.Kristallogr.-New Cryst.Struct. (2004), 219, 101                                                                                                    |
| FIRMOJ   | B.Tinant, D.Bayot, M.Devillers, Z.Kristallogr.-New Cryst.Struct. (2004), 219, 381                                                                                                   |
| FIRQIH   | T.Loiseau, F.Serpaggi, G.Ferey, Z.Kristallogr.-New Cryst.Struct. (2004), 219, 469                                                                                                   |
| FISFAO   | P.A.Lay, G.M.McLaughlin, A.M.Sargeson, Aust.J.Chem. (1987), 40, 1267                                                                                                                |
| FIXKUT   | Miao Du, Xiao-Jun Zhao, Hua Cai, Z.Kristallogr.-New Cryst.Struct. (2004), 219, 463                                                                                                  |
| FOGWUU   | Li-Hua Huo, Shan Gao, Shixiao Xu, Hui Zhao, Acta Crystallogr.,Sect.E:Struct.Rep.Online (2005), 61, m449, doi:10.1107/S1600536805003120                                              |
| FOHREZ   | H.Schmidbaur, R.Pichl, G.Muller, Z.Naturforsch.,B:Chem.Sci. (1986), 41, 395                                                                                                         |
| FOPBAN   | S.F.Colmanet, G.A.Williams, M.F.Mackay, J.Chem.Soc.,Dalton Trans. (1987), 2305, doi:10.1039/dt9870002305                                                                            |
| FOWCUP   | Z.A.Savel'eva, G.V.Romanenko, E.G.Boguslavskii, L.A.Sheludyakova, S.V.Larionov, Koord.Khim.(Russ.)(Coord.Chem.) (2000), 26, 305                                                     |
| FUHWEL   | B.Covelo, R.Carballo, E.M.Vazquez-Lopez, A.B.Lago, Synth.React.Inorg.,Met.-Org.,Nano-Met.Chem. (2008), 38, 49                                                                       |
| FUJVAH   | I.Leban, D.Gantar, B.Frlec, D.R.Russell, J.H.Holloway, Acta Crystallogr.,Sect.C:Cryst.Struct.Comm. (1987), 43, 1888, doi:10.1107/S010827018708973X                                  |
| FULHOJ   | J.L.Fourquet, F.Plet, Y.Calage, R.de Pape, J.Solid State Chem. (1987), 69, 76, doi:10.1016/0022-4596(87)90012-0                                                                     |
| FUTDOO   | Yingli Pan, Qinyan Jin, Jiangfang Chen, Yong Zhang, Dingxian Jia, Inorg.Chem. (2009), 48, 5412, doi:10.1021/ic9003615                                                               |
| FUTPIT   | R.L.Richards, C.Shortman, D.C.Povey, G.W.Smith, Acta Crystallogr.,Sect.C:Cryst.Struct.Comm. (1987), 43, 2309, doi:10.1107/S010827018708795X                                         |
| FUYGUB   | I.Schmidt, U.Patt-Siebel, U.Muller, K.Dehnicke, Z.Anorg.Allg.Chem. (1988), 556, 57, doi:10.1002/zaac.19885560104                                                                    |
| GALQAL   | M.Allevi, D.Capitani, A.Ettorre, P.Mura, Inorg.Chim.Acta (1998), 282, 17, doi:10.1016/S0020-1693(98)00192-3                                                                         |
| GAWBUC   | M.R.Silva, A.M.Beja, J.A.Paixao, Acta Crystallogr.,Sect.E:Struct.Rep.Online (2005), 61, m2459, doi:10.1107/S160053680503504X                                                        |
| GAZNOK   | E.Conradi, R.Bohrer, R.Weber, U.Muller, Z.Kristallogr. (1987), 181, 187                                                                                                             |
| GEBLUU   | P.D.Robinson, C.C.Hinckley, M.Matusz, P.A.Kibala, Acta Crystallogr.,Sect.C:Cryst.Struct.Comm. (1988), 44, 619, doi:10.1107/S0108270187011995                                        |
| GEGBOK   | D.Bose, G.Mostafa, R.D.B.Walsh, M.J.Zaworotko, B.K.Ghosh, Polyhedron (2006), 25, 663, doi:10.1016/j.poly.2005.08.009                                                                |
| GETMUO   | E.V.Cherkasova, A.V.Virovets, E.V.Perespikina, T.G.Cherkasova, E.S.Tatarinova, Zh.Neorg.Khim.(Russ.)(Russ.J.Inorg.Chem.) (2006), 51, 609                                            |
| GEXQOP   | R.Wartchow, Z.Kristallogr.-New Cryst.Struct. (1997), 212, 83                                                                                                                        |
| GICNAH   | A.Hazell, Acta Crystallogr.,Sect.C:Cryst.Struct.Comm. (1988), 44, 1362, doi:10.1107/S0108270188003786                                                                               |
| GICNEL   | A.Hazell, Acta Crystallogr.,Sect.C:Cryst.Struct.Comm. (1988), 44, 1362, doi:10.1107/S0108270188003786                                                                               |
| GIJVEA   | H.-J.Meyer, J.Pickardt, Z.Anorg.Allg.Chem. (1988), 560, 185, doi:10.1002/zaac.19885600122                                                                                           |
| GIMZIM   | H.Zhong, X.-M.Yang, H.-L.Xie, C.-J.Luo, Acta Crystallogr.,Sect.E:Struct.Rep.Online (2007), 63, m2774, doi:10.1107/S1600536809049964                                                 |

|          |                                                                                                                                                                                                                                            |
|----------|--------------------------------------------------------------------------------------------------------------------------------------------------------------------------------------------------------------------------------------------|
| GOKWUY   | S.V.Larionov, Z.A.Savel'eva, G.V.Romanenko, N.V.Podberezskaya, L.A.Sheludyakova, T.A.Andreeva, <i>Koord.Khim.(Russ.) (Coord.Chem.)</i> (1998), 24, 837                                                                                     |
| GOLJEW   | K.Stumpf, R.Blachnik, G.Roth, G.Kastner, Z.Kristallogr.-New Cryst.Struct. (1999), 214, 399                                                                                                                                                 |
| GOZCIH   | M.Schur, H.Rijnberk, C.Nather, W.Bensch, <i>Polyhedron</i> (1999), 18, 101, doi:10.1016/S0277-5387(98)00272-1                                                                                                                              |
| GUCCEN   | I.Boldog, J.-C.Daran, A.N.Chernega, E.B.Rusanov, H.Krautscheid, K.V.Domasevitch, <i>Cryst.Growth Des.</i> (2009), 9, 2895, doi:10.1021/cg9002109                                                                                           |
| GUHGOF   | C.Horn, M.Scudder, I.Dance, <i>CrystEngComm</i> (2000), 2, 196, doi:10.1039/b008751n                                                                                                                                                       |
| GUKGAV   | Gong-Jun Chen, Feng-Xian Gao, Fu-Ping Huang, Jin-Lei Tian, Wen Gu, Xin Liu, Shi-Ping Yan, Dai-Zheng Liao, <i>Cryst.Growth Des.</i> (2009), 9, 2662, doi:10.1021/cg801227e                                                                  |
| GUKGEZ   | C.Borel, K.Larsson, M.Hakansson, B.E.Olsson, A.D.Bond, L.Ohrstrom, <i>Cryst.Growth Des.</i> (2009), 9, 2821, doi:10.1021/cg900075j                                                                                                         |
| GUKGID   | C.Borel, K.Larsson, M.Hakansson, B.E.Olsson, A.D.Bond, L.Ohrstrom, <i>Cryst.Growth Des.</i> (2009), 9, 2821, doi:10.1021/cg900075j                                                                                                         |
| GUXJOY   | Jian-Zhong Wu, E.Bouwman, J.Reedijk, A.M.Mills, A.L.Spek, Private Communication (2003)                                                                                                                                                     |
| HEHSIW   | P.-A.Marioni, W.Marty, H.Stoeckli-Evans, C.Whitaker, <i>Inorg.Chim.Acta</i> (1994), 219, 161, doi:10.1016/0020-1693(94)03829-5                                                                                                             |
| HEVCOA   | M.Leduc, A.L.Beauchamp, <i>Acta Crystallogr.,Sect.C:Cryst.Struct.Commun.</i> (1994), 50, 1683, doi:10.1107/S0108270194004130                                                                                                               |
| HEYRUZ   | M.A.Strelkov, M.G.Zhizhin, S.V.Simonov, O.V.Smirnova, L.N.Komissarova, <i>Zh.Neorg.Khim.(Russ.)(Russ.J.Inorg.Chem.)</i> (2005), 50, 2002                                                                                                   |
| HIDGIK   | S.Sawusch, U.Schilde, Z.Kristallogr.-New Cryst.Struct. (1999), 214, 79                                                                                                                                                                     |
| HIDMEM   | L.M.Daniels, C.A.Murillo, K.G.Rodriguez, <i>Inorg.Chim.Acta</i> (1995), 229, 27, doi:10.1016/0020-1693(94)04222-H                                                                                                                          |
| HIGZAY   | H.Tamura, N.Ikeda, T.Iguro, T.Ohno, G.Matsubayashi, <i>Acta Crystallogr.,Sect.C:Cryst.Struct.Commun.</i> (1996), 52, 1394, doi:10.1107/S0108270196000042                                                                                   |
| HIQYUC   | Jun-Min Du, Zhang-Jin Zhang, Hong-Mei Lin, Wei Li, Guo-Cong Guo, <i>Acta Crystallogr.,Sect.E:Struct.Rep.Online</i> (2007), 63, m3206, doi:10.1107/S1600536807059971                                                                        |
| HIRDOB   | T.Otsuka, N.Takahashi, N.Fujigasaki, A.Sekine, Y.Ohashi, Y.Kaizu, <i>Inorg.Chem.</i> (1999), 38, 1340, doi:10.1021/ic9810541                                                                                                               |
| HIRDOB2  | R.E.Marsh, A.L.Spek, <i>Acta Crystallogr.,Sect.B:Struct.Sci.</i> (2001), 57, 800, doi:10.1107/S0108768101014331                                                                                                                            |
| HIRTIL   | N.Kuhn, H.Kotowski, C.Maichle-Moessmer, U.Abram, <i>Z.Anorg.Allg.Chem.</i> (1998), 624, 1653, doi:10.1002/(SICI)1521-3749(199810)624:103.3.CO;2-H                                                                                          |
| HITPOQ   | J.Szklarzewicz, D.Matoga, A.Niezgoda, D.Yoshioka, M.Mikuriya, <i>Inorg.Chem.</i> (2007), 46, 9531, doi:10.1021/ic701395r                                                                                                                   |
| HMCIFE15 | I.P.Lavrent'ev, L.G.Korableva, E.A.Lavrent'eva, G.A.Nifontova, M.L.Khidekel, I.G.Gusakovskaya, T.I.Larkina, L.D.Arutyunyan, O.S.Filipenko, V.I.Ponomarev, L.O.Atovmyan, <i>Transition Met.Chem.</i> (1980), 5, 193, doi:10.1007/BF01396911 |
| HOCFIP   | Huiyuan Ma, Xiaodan Wang, Fuping Wang, Lizhou Wu, <i>Cryst.Res.Technol.</i> (2008), 43, 455, doi:10.1002/crat.200710994                                                                                                                    |
| HOCQUL   | A.E.Shvelashvili, E.V.Miminoshvili, V.K.Bel'sky, T.O.Vardosanidze, M.G.Tavberidze, <i>Zh.Neorg.Khim.(Russ.)(Russ.J.Inorg.Chem.)</i> (1999), 44, 241                                                                                        |
| HOXCUS   | T.A.Balakaeva, A.S.Kanishcheva, Yu.E.Gorbunova, M.G.Ezernitskaya, Yu.N.Mikhailov, N.P.Konovalova, I.A.Efimenko, <i>Koord.Khim.(Russ.)(Coord.Chem.)</i> (1999), 25, 127                                                                     |
| HOHPOJ   | N.G.Furmanova, V.B.Bergo, V.F.Resnyansky, K.S.Sulaimankulov, Sh.Zh.Zhorobekova, D.K.Sulaimankulova, <i>Kristallografiya(Russ.)(Crystallogr.Rep.)</i> (1998), 43, 646                                                                       |
| HOHPUP   | N.G.Furmanova, V.B.Bergo, V.F.Resnyansky, K.S.Sulaimankulov, Sh.Zh.Zhorobekova, D.K.Sulaimankulova, <i>Kristallografiya(Russ.)(Crystallogr.Rep.)</i> (1998), 43, 646                                                                       |
| HOLMIE   | E.Bernhardt, B.Bley, R.Wartchow, H.Willner, E.Bill, P.Kuhn, I.H.T.Sham, M.Bodenbinder, R.Brochler, F.Aubke, <i>J.Am.Chem.Soc.</i> (1999), 121, 7188, doi:10.1021/ja990958y                                                                 |
| HOLMOK   | E.Bernhardt, B.Bley, R.Wartchow, H.Willner, E.Bill, P.Kuhn, I.H.T.Sham, M.Bodenbinder, R.Brochler, F.Aubke, <i>J.Am.Chem.Soc.</i> (1999), 121, 7188, doi:10.1021/ja990958y                                                                 |
| HOSPOV   | Lizhen Zhao, Ping Li, Baoliang Cao, <i>Acta Crystallogr.,Sect.E:Struct.Rep.Online</i> (2009), 65, m368, doi:10.1107/S1600536809007296                                                                                                      |
| HPYRUB   | J.L.Templeton, <i>J.Am.Chem.Soc.</i> (1979), 101, 4906, doi:10.1021/ja00511a020                                                                                                                                                            |
| HUQMEL   | M.Bujak, W.Frank, <i>Z.Naturforsch.,B:Chem.Sci.</i> (2002), 57, 1391                                                                                                                                                                       |
| HUYDIO   | C.Lau, A.Dietrich, M.Plate, P.Dierkes, B.Neumuller, S.Wocadlo, W.Massa, K.Harms, K.Dehnicke, <i>Z.Anorg.Allg.Chem.</i> (2003), 629, 473, doi:10.1002/zaac.200390078                                                                        |
| ICETEQ   | P.Vaqueiro, D.P.Darlow, A.V.Powell, A.M.Chippindale, <i>Solid State Ionics</i> (2004), 172, 601, doi:10.1016/j.ssi.2004.01.064                                                                                                             |
| IDECOK   | E.Lai-Ming Wong, R.Wai-Yin Sun, N.P.-Y.Chung, Chen-Lung S.Lin, Nianyong Zhu, Chi-Ming Che, <i>J.Am.Chem.Soc.</i> (2006), 128, 4938, doi:10.1021/ja057883k                                                                                  |
| IWOJOT   | Shan Gao, Ji-Wei Liu, Li-Hua Huo, Hui Zhao, Jing-Gui Zhao, <i>Acta Crystallogr.,Sect.E:Struct.Rep.Online</i> (2004), 60, m622, doi:10.1107/S1600536804009067                                                                               |
| IWOZID   | A.Kochel, <i>Acta Crystallogr.,Sect.E:Struct.Rep.Online</i> (2004), 60, m859, doi:10.1107/S1600536804012255                                                                                                                                |
| IXODII   | Jing-Yang Niu, Zi-Liang Wang, Jing-Ping Wang, <i>Polyhedron</i> (2004), 23, 773, doi:10.1016/j.poly.2003.11.050                                                                                                                            |
| IXODII2  | Jing-Yang Niu, Zi-Liang Wang, Jing-Ping Wang, <i>Polyhedron</i> (2004), 23, 773, doi:10.1016/j.poly.2003.11.050                                                                                                                            |
| IYULIX   | R.E.Norman, Ming Xie, <i>J.Coord.Chem.</i> (2004), 57, 425, doi:10.1080/00958970410001696807                                                                                                                                               |
| JAKBEC   | H.W.Roesky, B.Mainz, M.Noltmeyer, G.M.Sheldrick, <i>Z.Naturforsch.,B:Chem.Sci.</i> (1988), 43, 941                                                                                                                                         |
| JATFIT   | U.Muller, A.El-Kholi, <i>Acta Crystallogr.,Sect.C:Cryst.Struct.Commun.</i> (1989), 45, 1727, doi:10.1107/S0108270189002775                                                                                                                 |
| JAVKEW   | E.Hartmann, K.Dehnicke, D.Fenske, H.Goesmann, G.Baum, <i>Z.Naturforsch.,B:Chem.Sci.</i> (1989), 44, 1155                                                                                                                                   |
| JAWRUU   | W.A.Herrmann, W.R.Thiel, E.Herdtwack, <i>Polyhedron</i> (1988), 7, 2027, doi:10.1016/S0277-5387(00)80719-6                                                                                                                                 |
| JEHBAA   | M.Shatrak, K.R.Dunbar, Private Communication (2006)                                                                                                                                                                                        |
| JEPQOL   | A.Hagenbach, E.Yegen, U.Abram, <i>Inorg.Chem.</i> (2006), 45, 7331, doi:10.1021/ic060896u                                                                                                                                                  |
| JEQNEZ   | Qinhe Pan, Jiyang Li, Jihong Yu, Yu Wang, Qianrong Fang, Ruren Xu, <i>Gaodeng Xuexiao Huaxue Xuebao(Chin.)(Chem.J.Chin.Univ.(Chinese Edition))</i> (2005), 26, 2199                                                                        |
| JERNID   | S.E.Groh, P.J.Riggs, C.J.Baldacchini, A.L.Rheingold, <i>Inorg.Chim.Acta</i> (1990), 174, 17, doi:10.1016/S0020-1693(00)80272-8                                                                                                             |
| JESFOC   | K.Ruhlandt-Senge, A.-D.Bacher, U.Muller, <i>Acta Crystallogr.,Sect.C:Cryst.Struct.Commun.</i> (1990), 46, 1925, doi:10.1107/S0108270190004243                                                                                              |
| JIZLOT   | P.Storek, A.Weiss, <i>Z.Naturforsch.,B:Chem.Sci.</i> (1991), 46, 1214                                                                                                                                                                      |
| JOYPUI   | F.A.Cotton, L.M.Daniels, G.T.Jordan IV, C.A.Murillo, <i>Polyhedron</i> (1998), 17, 589, doi:10.1016/S0277-5387(97)00355-0                                                                                                                  |
| KADXAP   | F.Thetiot, F.Berezovsky, S.Triki, J.S.Pala, C.J.Gomez-Garcia, A.A.Hajem, S.Bouguessa, J.-M.Fabre, <i>Comptes Rendus Chimie</i> (2003), 6, 291, doi:10.1016/S1631-0748(03)00046-8                                                           |

|          |                                                                                                                                                                                            |
|----------|--------------------------------------------------------------------------------------------------------------------------------------------------------------------------------------------|
| KAGLAG   | J.Bendix, P.Steenberg, I.Sotofte, <i>Inorg.Chem.</i> (2003), 42, 4510                                                                                                                      |
| KAGNEM   | Jian-Fang Ma, Jin Yang, Jing-Fu Liu, <i>Acta Crystallogr.,Sect.E:Struct.Rep.Online</i> (2003), 59, m485, doi:10.1107/S1600536803013084                                                     |
| KAHKIN   | W.E.Buschmann, L.Liable-Sands, A.L.Rheingold, J.S.Miller, <i>Inorg.Chim.Acta</i> (1999), 284, 175, doi:10.1016/S0020-1693(98)00284-9                                                       |
| KAKQES   | J.A.Kautz, D.F.Mullica, J.M.Farmer, <i>J.Chem.Cryst.</i> (1999), 29, 729, doi:10.1023/A:1009540307898                                                                                      |
| KAMPEU   | W.Rekik, H.Naili, T.Mhiri, T.Bataille, <i>Acta Crystallogr.,Sect.E:Struct.Rep.Online</i> (2005), 61, m629, doi:10.1107/S1600536805005982                                                   |
| KAPLOD   | T.J.Podesta, A.G.Orpen, <i>Cryst.Growth Des.</i> (2005), 5, 681, doi:10.1021/cg049783g                                                                                                     |
| KAXQUW   | A.Hagenbach, U.Abram, Z.Anorg.Allg.Chem. (2005), 631, 2303, doi:10.1002/zaac.200500267                                                                                                     |
| KEWHOJ   | F.A.Cotton, M.P.Diebold, W.J.Roth, <i>Acta Crystallogr.,Sect.C:Cryst.Struct.Commun.</i> (1990), 46, 1624, doi:10.1107/S0108270189013764                                                    |
| KIBFUX   | Jing-Hua Yu, Yong-Ge Wei, Chang-Jiang Ding, Hong-Guang Du, Sheng-Gang Yan, Hong-You Guo, <i>Chin.J.Chem.</i> (2006), 24, 695, doi:10.1002/cjoc.200690132                                   |
| KIBGAE   | Jing-Hua Yu, Yong-Ge Wei, Chang-Jiang Ding, Hong-Guang Du, Sheng-Gang Yan, Hong-You Guo, <i>Chin.J.Chem.</i> (2006), 24, 695, doi:10.1002/cjoc.200690132                                   |
| KIBMIS   | D.Hess, M.Gorlov, A.Fischer, L.Kloo, <i>Z.Anorg.Allg.Chem.</i> (2007), 633, 643, doi:10.1002/zaac.200600391                                                                                |
| KIBMOY   | D.Hess, M.Gorlov, A.Fischer, L.Kloo, <i>Z.Anorg.Allg.Chem.</i> (2007), 633, 643, doi:10.1002/zaac.200600391                                                                                |
| KIPYUD   | T.N.Mali, R.D.Hancock, J.C.A.Boeyens, E.L.Oosthuizen, <i>J.Chem.Soc.,Dalton Trans.</i> (1991), 1161, doi:10.1039/dt9910001161                                                              |
| KIWRIS   | M.Hanauer, A.Neshat, T.P.Bigioni, <i>Acta Crystallogr.,Sect.C:Cryst.Struct.Commun.</i> (2008), 64, m111, doi:10.1107/S0108270108001972                                                     |
| KMOITC   | J.R.Knox, K.Eriks, <i>Inorg.Chem.</i> (1968), 7, 84, doi:10.1021/ic50059a017                                                                                                               |
| KOJVAG   | B.V.Bukvetskii, A.V.Gerasimenko, R.L.Davidovich, <i>Koord.Khim.(Russ.)(Coord.Chem.)</i> (1990), 16, 1479                                                                                   |
| KOXLTV01 | Kil Sik Min, A.L.Rheingold, J.S.Miller, <i>Inorg.Chem.</i> (2005), 44, 8433, doi:10.1021/ic051373+                                                                                         |
| KOYXOL   | U.Calov, M.Schneider, P.Leibnitz, <i>Z.Anorg.Allg.Chem.</i> (1991), 604, 77, doi:10.1002/zaac.19916040111                                                                                  |
| KULRAL   | R.P.Sharma, A.Singh, I.K.Bharaj, V.Ferretti, P.Venugopalan, <i>J.Mol.Struct.</i> (2009), 931, 1, doi:10.1016/j.molstruc.2009.05.023                                                        |
| LAHFUV   | T.Chenal, R.Naigre, I.Cipres, P.Kalck, J.-C.Daran, J.Vaissermann, <i>Chem.Commun.</i> (1993), 747                                                                                          |
| LALHAH   | F.D.Rochon, R.Melanson, <i>Acta Crystallogr.,Sect.C:Cryst.Struct.Commun.</i> (1993), 49, 1259, doi:10.1107/S010827019300321X                                                               |
| LARPAW   | E.Bernhardt, C.Bach, B.Bley, R.Wartchow, U.Westphal, I.H.T.Sham, B.von Ahsen, Changqing Wang, H.Willner, R.C.Thompson, F.Aubke, <i>Inorg.Chem.</i> (2005), 44, 4189, doi:10.1021/ic040115u |
| LARPEA   | E.Bernhardt, C.Bach, B.Bley, R.Wartchow, U.Westphal, I.H.T.Sham, B.von Ahsen, Changqing Wang, H.Willner, R.C.Thompson, F.Aubke, <i>Inorg.Chem.</i> (2005), 44, 4189, doi:10.1021/ic040115u |
| LARPIE   | E.Bernhardt, C.Bach, B.Bley, R.Wartchow, U.Westphal, I.H.T.Sham, B.von Ahsen, Changqing Wang, H.Willner, R.C.Thompson, F.Aubke, <i>Inorg.Chem.</i> (2005), 44, 4189, doi:10.1021/ic040115u |
| LARPOK   | E.Bernhardt, C.Bach, B.Bley, R.Wartchow, U.Westphal, I.H.T.Sham, B.von Ahsen, Changqing Wang, H.Willner, R.C.Thompson, F.Aubke, <i>Inorg.Chem.</i> (2005), 44, 4189, doi:10.1021/ic040115u |
| LEBRUF   | S.Dieterich, J.Strahle, <i>Z.Naturforsch.,B:Chem.Sci.</i> (1993), 48, 1574                                                                                                                 |
| LEFYAX   | N.SeethaLekshmi, V.R.Pedireddi, <i>Inorg.Chem.</i> (2006), 45, 2400, doi:10.1021/ic052100h                                                                                                 |
| LEXSIR   | Wei Xu, Jian-Li Lin, <i>Acta Crystallogr.,Sect.E:Struct.Rep.Online</i> (2007), 63, m767, doi:10.1107/S1600536807006769                                                                     |
| LIDQUL   | Ah-Ran Song, In-Chul Hwang, Kwang Ha, <i>Z.Kristallogr.-New Cryst.Struct.</i> (2007), 222, 43                                                                                              |
| LIDYUT   | D.W.Aldous, N.F.Stephens, P.Lightfoot, <i>Dalton Trans.</i> (2007), 2271, doi:10.1039/b702146a                                                                                             |
| LIKRIH   | E.Cariati, R.Macchi, D.Roberto, R.Ugo, S.Galli, N.Casati, P.Macchi, A.Sironi, L.Bogani, A.Caneschi, D.Gatteschi, <i>J.Am.Chem.Soc.</i> (2007), 129, 9410, doi:10.1021/ja0710712            |
| LIMPUS   | M.A.S.Aquino, W.Clegg, Qiu-Tian Liu, A.G.Sykes, <i>Acta Crystallogr.,Sect.C:Cryst.Struct.Commun.</i> (1995), 51, 560, doi:10.1107/S0108270194010826                                        |
| LIPXIS   | Xuda Wang, Yunhe Xu, Xueyan Song, Licun Li, Daizheng Liao, Zonghui Jiang, Shiping Yan, <i>J.Chem.Cryst.</i> (2007), 37, 651, doi:10.1007/s10870-007-9209-6                                 |
| LIPXIS   | Xuda Wang, Yunhe Xu, Xueyan Song, Licun Li, Daizheng Liao, Zonghui Jiang, Shiping Yan, <i>J.Chem.Cryst.</i> (2007), 37, 651, doi:10.1007/s10870-007-9209-6                                 |
| LIPXIS2  | Xuda Wang, Yunhe Xu, Xueyan Song, Licun Li, Daizheng Liao, Zonghui Jiang, Shiping Yan, <i>J.Chem.Cryst.</i> (2007), 37, 651, doi:10.1007/s10870-007-9209-6                                 |
| LIWKOR01 | Qian-xin Zhao, Jie Deng, Ding-xian Jia, Yong Zhang, Jie Dai, <i>Huaxue Yanjiu Yu Yingyong(Chin.)(Chem.Res.Appln.)</i> (2006), 18, 823                                                      |
| LIYWUL   | R.L.Luck, P.Gawryszewska, J.P.Riehl, <i>Acta Crystallogr.,Sect.C:Cryst.Struct.Commun.</i> (2000), 56, e238, doi:10.1107/S0108270100006107                                                  |
| LORCEA   | I.Ban, M.Kristl, B.Volavsek, L.Golic, <i>Monatsh.Chem.</i> (1999), 130, 401                                                                                                                |
| LUHCAA   | T.M.Polyanskaya, V.V.Volkov, C.Price, M.Thornton-Pett, J.D.Kennedy, <i>Khim.Interesakh Ustoich.Razvit.(Russ.)(Chem.Sustainable Development)</i> (2000), 8, 229                             |
| LUHWAM   | T.G.Cherkasova, K.V.Mezentsev, <i>Zh.Neorg.Khim.(Russ.)(Russ.J.Inorg.Chem.)</i> (2002), 47, 271                                                                                            |
| LUMVAQ   | Cai-Hong Chen, Jiwen Cai, Xiao-Long Feng, Xiao-Ming Chen, <i>J.Chem.Cryst.</i> (2001), 31, 271, doi:10.1023/A:1014326712278                                                                |
| MAFECL   | L.D.Arutyunyan, V.I.Ponomarev, L.O.Atovmyan, E.A.Lavrent'eva, I.P.Lavrent'ev, M.L.Khidekel, <i>Koord.Khim.(Russ.)(Coord.Chem.)</i> (1979), 5, 943                                          |
| MANJIU   | N.E.Kuz'mina, K.K.Palkina, E.V.Savinkina, <i>Zh.Neorg.Khim.(Russ.)(Russ.J.Inorg.Chem.)</i> (1999), 44, 1988                                                                                |
| MAPHER   | Tian-Tian Pan, Jian-Rong Su, Duan-Jun Xu, <i>Acta Crystallogr.,Sect.E:Struct.Rep.Online</i> (2005), 61, m1376, doi:10.1107/S1600536805018982                                               |
| MEWZAP   | S.A.Dalrymple, M.Parvez, G.K.H.Shimizu, <i>Chem.Commun.</i> (2001), 2672, doi:10.1039/b110129n                                                                                             |
| MEWZET01 | S.A.Dalrymple, M.Parvez, G.K.H.Shimizu, <i>Inorg.Chem.</i> (2002), 41, 6986, doi:10.1021/ic025627s                                                                                         |
| MIJMUN   | Yongli Wei, Yu Zhu, Yinglin Song, Hongwei Hou, Yaoting Fan, <i>Inorg.Chem.Commun.</i> (2002), 5, 166, doi:10.1016/S1387-7003(02)00323-4                                                    |
| MIKJEW   | Pei-zhou Li, Xiao-ming Lu, Bo Liu, Shuo Wang, Xiao-jun Wang, <i>Inorg.Chem.</i> (2007), 46, 5823, doi:10.1021/ic070214i                                                                    |
| MIMDPT   | M.B.Cingi, A.M.M.Lanfredi, A.Tiripicchio, C.G.van Kralingen, J.Reedijk, <i>Inorg.Chim.Acta</i> (1980), 39, 265, doi:10.1016/S0020-1693(00)93665-X                                          |



|          |                                                                                                                                                                               |
|----------|-------------------------------------------------------------------------------------------------------------------------------------------------------------------------------|
| MINLAW   | E.Szyk, L.Pazderski, I.Lakomska, A.Surdykowski, T.Glowiak, J.Sitkowski, L.Kozerski, Polyhedron (2002), 21, 343, doi:10.1016/S0277-5387(01)01000-2                             |
| MIRKEE   | E.V.Makotchenko, I.A.Baidina, P.E.Plyusin, L.A.Sheludyakova, Yu.V.Shubin, S.V.Korenev, Koord.Khim.(Russ.)(Coord.Chem.) (2007), 33, 47                                         |
| MODCAK   | U.P.Singh, V.Aggarwal, Acta Crystallogr.,Sect.E:Struct.Rep.Online (2008), 64, m935, doi:10.1107/S1600536808018060                                                             |
| MOHFAR   | R.P.Sharma, A.Singh, P.Brandao, V.Felix, P.Venugopalan, J.Mol.Struct. (2008), 888, 291, doi:10.1016/j.molstruc.2007.12.021                                                    |
| MUPSOF1  | Liang Shen, Xun Xu, Duan-Jun Xu, Yuan-Zhi Xu, Wuji Huaxue Xuebao(Chin.)(Chin.J.Inorg.Chem.) (2002), 18, 309                                                                   |
| MUPSOF2  | Liang Shen, Xun Xu, Duan-Jun Xu, Yuan-Zhi Xu, Wuji Huaxue Xuebao(Chin.)(Chin.J.Inorg.Chem.) (2002), 18, 309                                                                   |
| NATGEV   | Yun-Long Fu, Zhi-Wei Xu, Jia-Lin Ren, S.W.Ng, Acta Crystallogr.,Sect.E:Struct.Rep.Online (2005), 61, m1639, doi:10.1107/S1600536805023391                                     |
| NAYQOU   | I.A.Baidina, S.V.Korenev, E.V.Makotchenko, S.A.Gromilov, Zh.Strukt.Khim.(Russ.)(J.Struct.Chem.) (2005), 46, 747                                                               |
| NAYWOZ   | W.R.Entley, C.R.Treadway, S.R.Wilson, G.S.Girolami, J.Am.Chem.Soc. (1997), 119, 6251, doi:10.1021/ja962773m                                                                   |
| NEPSAC   | S.S.Turner, P.Day, T.Gelbrich, M.B.Hursthouse, J.Solid State Chem. (2001), 159, 385, doi:10.1006/jssc.2001.9170                                                               |
| NESFIB   | Zhao-Peng Deng, Shan Gao, S.W.Ng, Acta Crystallogr.,Sect.E:Struct.Rep.Online (2006), 62, m3423, doi:10.1107/S1600536806048094                                                 |
| NICHOC10 | J.Kay, J.W.Moore, M.D.Glick, Inorg.Chem. (1972), 11, 2818, doi:10.1021/ic50117a047                                                                                            |
| NUHJUV   | K.Himmel, M.Jansen, Chem.Commun. (1998), 1205, doi:10.1039/a801862f                                                                                                           |
| NUYFOC   | K.Stumpf, R.Blachnik, H.Reuter, H.Eickmeier, Z.Kristallogr.-New Cryst.Struct. (1998), 213, 155                                                                                |
| OCELAK   | S.Parsons, X.Tan, R.Winpenney, P.A.Wood, Private Communication (2004)                                                                                                         |
| OCELIS   | S.Parsons, X.Tan, R.Winpenney, P.A.Wood, Private Communication (2004)                                                                                                         |
| OICIJU   | P.Albores, L.D.Slep, L.M.Baraldo, R.Baggio, M.T.Garland, E.Rentschler, Inorg.Chem. (2006), 45, 2361, doi:10.1021/ic0516818                                                    |
| OICIJU2  | P.Albores, L.D.Slep, L.M.Baraldo, R.Baggio, M.T.Garland, E.Rentschler, Inorg.Chem. (2006), 45, 2361, doi:10.1021/ic0516818                                                    |
| OFINAT   | A.K.Hijazi, A.A.Halmaideen, S.Syukri, N.Radhakrishnan, E.Herdtwec, B.Voit, F.E.Kuhn, Eur.J.Inorg.Chem. (2008), 2892, doi:10.1002/ejic.200800201                               |
| OGAKIR   | R.Gonzalez, N.Barboza, R.Chiozzzone, C.Kremer, D.Armentano, G.De Munno, J.Faus, Inorg.Chim.Acta (2008), 361, 2715, doi:10.1016/j.ica.2008.01.017                              |
| OGAKIR2  | R.Gonzalez, N.Barboza, R.Chiozzzone, C.Kremer, D.Armentano, G.De Munno, J.Faus, Inorg.Chim.Acta (2008), 361, 2715, doi:10.1016/j.ica.2008.01.017                              |
| OKOCAS   | I.A.Charushnikova, N.N.Krot, Z.A.Starikova, Radiokhimiya(Russ.)(Radiochem.) (2001), 43, 438                                                                                   |
| OLABAE   | E.Coronado, J.R.Galan-Mascaros, C.Gimenez-Saiz, C.J.Gomez-Garcia, J.M.Martinez-Agudo, E.Martinez-Ferrero, Polyhedron (2003), 22, 2381, doi:10.1016/S0277-5387(03)00191-8      |
| OLUXAU   | M.Taimisto, R.Oilunkaniemi, R.S.Laitinen, M.Ahlgren, Z.Naturforsch.,B:Chem.Sci. (2003), 58, 959                                                                               |
| PEHACO   | S.Sato, Y.Saito, Acta Crystallogr.,Sect.B:Struct.Crystallogr.Cryst.Chem. (1975), 31, 2456, doi:10.1107/S0567740875007790                                                      |
| PEPCOC   | I.Leban, P.Segedin, Z.Kristallogr. (1993), 206, 69                                                                                                                            |
| PERHIE   | M.Mal'arova, Z.Travnicek, R.Zboril, J.Cernak, Polyhedron (2006), 25, 2935, doi:10.1016/j.poly.2006.04.021                                                                     |
| PIMXIS   | M.C.Moron, F.Palacio, J.Pons, J.Casabo, X.Solans, K.E.Merabet, D.Huang, X.Shi, B.K.Teo, R.L.Carlin, Inorg.Chem. (1994), 33, 746, doi:10.1021/ic00082a021                      |
| PNIOCO   | K.R.Butler, M.R.Snow, J.Chem.Soc.A (1971), 565, doi:10.1039/j19710000565                                                                                                      |
| POCJAS   | G.V.Romanenko, Z.A.Savel'eva, N.V.Podbereskaya, V.I.Alekseev, S.V.Larionov, Zh.Strukt.Khim.(Russ.)(J.Struct.Chem.) (1994), 35, 48-3                                           |
| PORQAO   | J.-U.Rohde, W.Preetz, Z.Anorg.Allg.Chem. (1998), 624, 1319, doi:10.1002/(SICI)1521-3749(199808)624:83.0.CO;2-Q                                                                |
| PSBRNB   | U.Muller, R.Dubgen, K.Dehnicke, Z.Anorg.Allg.Chem. (1981), 473, 115, doi:10.1002/zaac.19814730213                                                                             |
| PUHJIL   | K.Himmel, M.Jansen, Eur.J.Inorg.Chem. (1998), 1183, doi:10.1002/(SICI)1099-0682(199808)1998:83.3.CO;2-C                                                                       |
| PUHSOB   | J.Masland, J.Diaz, S.Eady, E.Lobkovsky, A.Larsen, Acta Crystallogr.,Sect.E:Struct.Rep.Online (2010), 66, m325, doi:10.1107/S1600536810006252                                  |
| PYFEFE   | R.J.Doedens, L.F.Dahl, J.Am.Chem.Soc. (1966), 88, 4847, doi:10.1021/ja00973a018                                                                                               |
| PYPTHI   | G.Thiele, D.Wagner, Z.Anorg.Allg.Chem. (1978), 446, 126, doi:10.1002/zaac.19784460113                                                                                         |
| QEDCOR   | K.S.Hagen, Inorg.Chem. (2000), 39, 5867, doi:10.1021/ic000444w                                                                                                                |
| QEZYAV   | S.A.Kostina, A.B.Ilyukhin, B.V.Lokshin, V.Yu.Kotov, Mendeleev Commun. (2001), 12, doi:10.1070/MC2001v011n01ABEH001391                                                         |
| QIBZOR   | Dingxian Jia, Aimei Zhu, Yong Zhang, Jie Deng, Monatsh.Chem. (2007), 138, 191, doi:10.1007/s00706-007-0596-3                                                                  |
| QIJJAU   | O.Stahler, W.Preetz, Z.Anorg.Allg.Chem. (2001), 627, 615, doi:10.1002/1521-3749(200104)627:43.0.CO;2-4                                                                        |
| QIJJAU2  | O.Stahler, W.Preetz, Z.Anorg.Allg.Chem. (2001), 627, 615, doi:10.1002/1521-3749(200104)627:43.0.CO;2-4                                                                        |
| QIJJEY   | O.Stahler, W.Preetz, Z.Anorg.Allg.Chem. (2001), 627, 615, doi:10.1002/1521-3749(200104)627:43.0.CO;2-4                                                                        |
| QOFCOE   | E.B.Koropchanu, A.P.Rizha, V.N.Shafransky, O.A.Bologa, M.Gdaniec, S.T.Malinovsky, Zh.Strukt.Khim.(Russ.)(J.Struct.Chem.) (2007), 48, 1175                                     |
| RAGTOI   | W.Bensch, M.Schur, Z.Naturforsch.,B:Chem.Sci. (1997), 52, 405                                                                                                                 |
| RAJNIZ   | H.Brumm, M.Jansen, Z.Anorg.Allg.Chem. (2001), 627, 1433, doi:10.1002/1521-3749(200107)627:73.0.CO;2-H                                                                         |
| RENAB    | V.V.Tkachev, L.O.Atovmyan, V.B.Logvinova, R.L.Davidovich, Koord.Khim.(Russ.)(Coord.Chem.) (1996), 22, 831                                                                     |
| RIHFAP   | C.J.Keper, M.Kurmoo, P.Day, J.Mater.Chem. (1997), 7, 221, doi:10.1039/a605878g                                                                                                |
| RIQPEN   | S.D.Reid, A.L.Hector, W.Levason, G.Reid, B.J.Waller, M.Webster, Dalton Trans. (2007), 4769, doi:10.1039/b708809d                                                              |
| RITKUA   | Jing Li, Zhen Chen, T.J.Emge, D.M.Proserpio, Inorg.Chem. (1997), 36, 1437, doi:10.1021/ic960751v                                                                              |
| RIXHIP   | W.Frank, G.J.Reiss, Inorg.Chem. (1997), 36, 4593, doi:10.1021/ic970337a                                                                                                       |
| ROZLIC   | T.Mahenthirarajah, Yang Li, P.Lightfoot, Dalton Trans. (2009), 3280, doi:10.1039/b900356h                                                                                     |
| ROZLOI   | T.Mahenthirarajah, Yang Li, P.Lightfoot, Dalton Trans. (2009), 3280, doi:10.1039/b900356h                                                                                     |
| RUBLEG   | L.Drakopoulou, C.Papatriantafyllopoulou, A.Terzis, S.P.Perlepes, E.Manessi-Zoupa, G.S.Papaefstathiou, Bioinorg.Chem.Appl. (2007), 51567                                       |
| RUPGEP   | M.M.Belombe, J.Nenwa, Y.A.Mbiangue, F.Majoumo-Mbe, P.Lonnecke, E.Hey-Hawkins, Dalton Trans. (2009), 4519, doi:10.1039/b818793b                                                |
| SAHJER   | T.W.Hayton, B.O.Patrick, P.Legzdins, Inorg.Chem. (2004), 43, 7227, doi:10.1021/ic0491534                                                                                      |
| SALVEH   | Yuan-Fang Wang, Rong-Fang Li, Qing-Lun Wang, Li-Hua Yu, Guang-Ming Yang, Dai-Zheng Liao, Guang-Ming Yang, Transition Met.Chem. (2004), 29, 728, doi:10.1007/s11243-004-0839-7 |

|          |                                                                                                                                                                     |
|----------|---------------------------------------------------------------------------------------------------------------------------------------------------------------------|
| SENPOQ   | L.Chen, F.A.Cotton, J.Cluster Sci. (1998), 9, 63, doi:10.1023/A:1022629506670                                                                                       |
| SEZMEQ   | Ke-Qiang Gu, Yu-Xi Sun, Ran Zhang, Nian-Wei Zhang, Hong-Wen Che, Acta Crystallogr., Sect.E:Struct.Rep.Online (2007), 63, m740, doi:10.1107/S1600536807005636        |
| SIXXAY   | L.Kiriazis, R.Mattes, Z.Anorg.Allg.Chem. (1991), 593, 90, doi:10.1002/zaac.19915930109                                                                              |
| SIYZEF   | G.Bernardinelli, E.A.C.Lucken, M.Costines, Z.Kristallogr. (1991), 195, 139                                                                                          |
| SIYZIJ   | G.Bernardinelli, E.A.C.Lucken, M.Costines, Z.Kristallogr. (1991), 195, 141                                                                                          |
| SOGXOC   | Feng-Xia Ma, Ya-Guang Chen, Dong-Mei Shi, Fan-Xia Meng, Hai-Jun Pang, Transition Met.Chem. (2008), 33, 697, doi:10.1007/s11243-008-9099-2                           |
| SOZFIW   | R.Kuroda, Inorg.Chem. (1991), 30, 4954, doi:10.1021/ic00026a020                                                                                                     |
| SUVBUG   | M.A.Leonard, P.J.Squattrito, S.N.Dubey, Acta Crystallogr., Sect.C:Cryst.Struct.Commun. (1999), 55, 35, doi:10.1107/S0108270198010105                                |
| TAPBUH   | N.Galesic, V.B.Jordanovska, Acta Crystallogr., Sect.C:Cryst.Struct.Commun. (1992), 48, 256, doi:10.1107/S0108270191009435                                           |
| TAVTUF   | K.Sakai, Y.Yamada, T.Tsubomura, Inorg.Chem. (1996), 35, 3163, doi:10.1021/ic950688u                                                                                 |
| TEDDOV   | N.V.Podberezskaya, G.V.Romanenko, I.I.Tychinskaya, Zh.Strukt.Khim.(Russ.)(J.Struct.Chem.) (1996), 37, 132                                                           |
| TEDDOV2  | N.V.Podberezskaya, G.V.Romanenko, I.I.Tychinskaya, Zh.Strukt.Khim.(Russ.)(J.Struct.Chem.) (1996), 37, 132                                                           |
| TENCON   | D.Witiak, J.C.Clardy, D.S.Martin Junior, Acta Crystallogr., Sect.B:Struct.Crystallogr.Cryst.Chem. (1972), 28, 2694, doi:10.1107/S056774087200679X                   |
| TENRHC   | A.Whuler, C.Brouty, P.Spinat, P.Herpin, Acta Crystallogr., Sect.B:Struct.Crystallogr.Cryst.Chem. (1976), 32, 2238, doi:10.1107/S0567740876007486                    |
| TEQNAE   | F.A.Cotton, S.C.Haefner, A.P.Sattelberger, J.Am.Chem.Soc. (1996), 118, 5486, doi:10.1021/ja9604727                                                                  |
| TEVFIJ   | M.Hasan, I.V.Kozhevnikov, M.R.H.Siddiqui, C.Femoni, A.Steiner, N.Winterton, Inorg.Chem. (2001), 40, 795, doi:10.1021/ic000606o                                      |
| TGLYCR   | R.F.Bryan, P.T.Greene, P.F.Stokely, E.W.Wilson Junior, Inorg.Chem. (1971), 10, 1468, doi:10.1021/ic50101a031                                                        |
| TIBWIK   | W.A.Frank, G.J.Reiss, Chem.Ber. (1996), 129, 1355                                                                                                                   |
| TIGGEW   | Mao-Ping Song, Lin-Ke Li, Ben-Lai Wu, Yun-Yin Niu, Acta Crystallogr., Sect.E:Struct.Rep.Online (2007), 63, m2217, doi:10.1107/S1600536807035416                     |
| TIUREA01 | P.H.Davis, J.S.Wood, Inorg.Chem. (1970), 9, 1111, doi:10.1021/ic50087a022                                                                                           |
| TIVJEN   | Z.A.Savel'eva, G.V.Romanenko, N.V.Podberezskaya, S.V.Larionov, Polyhedron (1996), 15, 3581, doi:10.1016/0277-5387(96)00076-9                                        |
| TIZXAC   | A.P.Rizha, E.B.Koropchanu, O.A.Bologa, S.T.Malinovsky, M.Gdaniec, Zh.Strukt.Khim.(Russ.)(J.Struct.Chem.) (2007), 48, 1197                                           |
| TMAPTF01 | H.Kuppers, O.Gobel, C.Bruhn, W.Preetz, A.Pietraszko, Z.Kristallogr. (1999), 214, 178                                                                                |
| TMFETC   | U.Muller, Acta Crystallogr., Sect.B:Struct.Crystallogr.Cryst.Chem. (1977), 33, 2197, doi:10.1107/S0567740877008000                                                  |
| TMFETC2  | A.W.Addison, R.J.Butcher, Z.Homonnay, V.V.Pavlishchuk, M.J.Prushan, L.K.Thompson, Eur.J.Inorg.Chem. (2005), 2404, doi:10.1002/ejic.200400867                        |
| TOQDAE   | B.D.James, M.Bakalova, J.Liesegang, W.M.Reiff, D.C.R.Hockless, B.W.Skelton, A.H.White, Inorg.Chim.Acta (1996), 247, 169, doi:10.1016/0020-1693(95)04955-X           |
| TOWCAJ   | R.Vicente, A.Escuer, X.Solans, M.Font-Bardia, Inorg.Chim.Acta (1996), 248, 59, doi:10.1016/0020-1693(95)04985-1                                                     |
| TUCNIO   | Linfeng Chen, F.A.Cotton, Inorg.Chem. (1996), 35, 7364, doi:10.1021/ic960454q                                                                                       |
| UBEFEM   | D.J.Williams, J.S.Kruger, A.F.McLeroy, A.P.Wilkinson, J.C.Hanson, Chem.Mater. (1999), 11, 2241, doi:10.1021/cm9901921                                               |
| UCOMEI   | M.Eshel, A.Bino, Inorg.Chim.Acta (2001), 320, 127, doi:10.1016/S0020-1693(01)00492-3                                                                                |
| UFEPEA   | H.Kuppers, O.Gobel, C.Bruhn, W.W.Schmahl, Z.Kristallogr. (2001), 216, 354                                                                                           |
| VELQEJ   | M.Rafizadeh, V.Amani, Acta Crystallogr., Sect.E:Struct.Rep.Online (2006), 62, m1776, doi:10.1107/S1600536806025050                                                  |
| VENYAO   | M.E.Prater, L.E.Pence, R.Clerac, G.M.Finniss, C.Campana, P.Auban-Senzier, D.Jerome, E.Canadell, K.R.Dunbar, J.Am.Chem.Soc. (1999), 121, 8005, doi:10.1021/ja991130e |
| VEPSUE   | D.G.L.Holt, L.F.Larkworthy, D.C.Povey, G.W.Smith, G.J.Leigh, Inorg.Chim.Acta (1990), 169, 201, doi:10.1016/S0020-1693(00)80518-6                                    |
| VIDGIZ   | Hui-Hua Song, Bao-Qing Ma, Acta Crystallogr., Sect.E:Struct.Rep.Online (2007), 63, m1010, doi:10.1107/S160053680701001X                                             |
| WABLIU10 | E.J.Kosnic, E.L.McClymont, R.A.Hodder, P.J.Squattrito, Inorg.Chim.Acta (1996), 244, 253, doi:10.1016/0020-1693(95)04784-0                                           |
| WAPJUT   | A.K.Boudalis, V.Nastopoulos, C.P.Raptopoulou, A.Terzis, S.P.Perlepes, Z.Naturforsch., B:Chem.Sci. (2005), 60, 363                                                   |
| WERKIN10 | R.Bianchi, C.Gatti, V.Adovasio, M.Nardelli, Acta Crystallogr., Sect.B:Struct.Sci. (1996), 52, 471, doi:10.1107/S0108768195016879                                    |
| WERKIN2  | V.Adovasio, F.Lina, M.Nardelli, G.Pelizzi, Acta Crystallogr., Sect.C:Cryst.Struct.Commun. (1994), 50, 871, doi:10.1107/S0108270193011588                            |
| WITLIU   | N.E.Kuz'mina, K.K.Palkina, E.V.Savinkina, I.A.Kozlova, N.T.Kuznetsov, Zh.Neorg.Khim.(Russ.)(Russ.J.Inorg.Chem.) (2000), 45, 10                                      |
| WITQAR   | N.E.Kuz'mina, K.K.Palkina, E.V.Savinkina, I.A.Kozlova, Zh.Neorg.Khim.(Russ.)(Russ.J.Inorg.Chem.) (2000), 45, 395                                                    |
| WITQEV   | N.E.Kuz'mina, K.K.Palkina, E.V.Savinkina, I.A.Kozlova, Zh.Neorg.Khim.(Russ.)(Russ.J.Inorg.Chem.) (2000), 45, 395                                                    |
| WOHDIG   | M.R.Silva, A.M.Beja, J.A.Paixao, L.A.da Veiga, Z.Kristallogr.-New Cryst.Struct. (2000), 215, 178                                                                    |
| WOQFAK   | O.Sereda, H.Stoekli-Evans, Private Communication (2008)                                                                                                             |
| WUGCOQ   | R.C.L.Zampieri, G.Von Poelhsitz, A.A.Batista, O.R.Nascimento, J.Ellena, E.E.Castellano, J.Inorg.Biochem. (2002), 92, 82, doi:10.1016/S0162-0134(02)00475-0          |
| WUGSEW   | S.Ferlay, V.Bulach, O.Felix, M.W.Hosseini, J.-M.Planeix, N.Kyritsakas, CrystEngComm (2002), 4, 447, doi:10.1039/b203336b                                            |
| XAJMOK   | D.F.Mullica, J.A.Kautz, J.M.Farmer, E.L.Sappenfield, J.Mol.Struct. (1999), 479, 31                                                                                  |
| XAPNOS   | O.V.Nesterova, S.R.Petrusenko, V.N.Kokozay, B.W.Skelton, J.K.Bjermose, P.R.Raithby, Inorg.Chim.Acta (2005), 358, 2725                                               |
| XECZAG   | K.Aoki, N.-H.Hu, T.Tokuno, A.O.Adeyemo, G.N.Williams, Inorg.Chim.Acta (1999), 290, 145                                                                              |
| XEDNAV   | M.Gorol, N.C.Mosch-Zanetti, M.Noltemeyer, H.W.Roesky, Z.Anorg.Allg.Chem. (2000), 626, 2318                                                                          |
| XEDNEZ   | M.Gorol, N.C.Mosch-Zanetti, M.Noltemeyer, H.W.Roesky, Z.Anorg.Allg.Chem. (2000), 626, 2318                                                                          |
| XEDNEZ2  | M.Gorol, N.C.Mosch-Zanetti, M.Noltemeyer, H.W.Roesky, Z.Anorg.Allg.Chem. (2000), 626, 2318                                                                          |
| XEDNID   | M.Gorol, N.C.Mosch-Zanetti, M.Noltemeyer, H.W.Roesky, Z.Anorg.Allg.Chem. (2000), 626, 2318                                                                          |
| XEDNID2  | M.Gorol, N.C.Mosch-Zanetti, M.Noltemeyer, H.W.Roesky, Z.Anorg.Allg.Chem. (2000), 626, 2318                                                                          |
| XIGSEL   | P.C.Junk, B.J.McCool, B.Moubaraki, K.S.Murray, L.Spiccia, J.D.Cashion, J.W.Steed, J.Chem.Soc., Dalton Trans. (2002), 1024, doi:10.1039/b105691n                     |

|          |                                                                                                                                                                     |
|----------|---------------------------------------------------------------------------------------------------------------------------------------------------------------------|
| XILJIM   | Yu-Xiao Li, Xiao-Ling Guo, Zheguang Wang, Yunyin Niu, Acta Crystallogr.,Sect.E:Struct.Rep.Online (2007), 63, m2568, doi:10.1107/S1600536807044753                   |
| XISFEL   | T.Hahn, W.Frank, Acta Crystallogr.,Sect.E:Struct.Rep.Online (2008), 64, m257, doi:10.1107/S1600536807067293                                                         |
| XOLYIG   | B.von Ahsen, M.Berkei, G.Henkel, H.Willner, F.Aubke, J.Am.Chem.Soc. (2002), 124, 8371, doi:10.1021/ja011639I                                                        |
| XUCBON   | S.Dinda, D.K.Hazra, S.R.Chowdhury, M.Helliwell, K.M.A.Malik, M.Mukherjee, R.Bhattacharyya, Inorg.Chim.Acta (2009), 362, 2108, doi:10.1016/j.ica.2008.09.029         |
| XUGBIK   | J.Pietikainen, A.Maaninen, R.S.Laitinen, R.Oilunkaniemi, J.Valkonen, Polyhedron (2002), 21, 1089, doi:10.1016/S0277-5387(02)00909-9                                 |
| YARREP   | A.L.Spek, N.Veldman, A.H.Velders, J.Reedijk, Private Communication (2005)                                                                                           |
| YASNUC   | J.A.Schlueter, R.J.Funk, U.Geiser, Acta Crystallogr.,Sect.C:Cryst.Struct.Commun. (2005), 61, m304, doi:10.1107/S0108270105010140                                    |
| YEGSAF   | Wei Shi, Xiao-Yan Chen, Bin Zhao, Ao Yu, Hai-Bin Song, Peng Cheng, Hong-Gen Wang, Dai-Zheng Liao, Shi-Ping Yan, Inorg.Chem. (2006), 45, 3949, doi:10.1021/ic051979y |
| YIBWOV   | D.M.Halepoto, L.F.Larkworthy, D.C.Povey, R.A.Siddiqui, G.W.Smith, Inorg.Chim.Acta (1994), 227, 167, doi:10.1016/0020-1693(94)04141-5                                |
| YOJBUI   | T.A.Balakaeva, Yu.E.Gorbunova, A.P.Kurbakova, Yu.N.Mikhailov, I.A.Efimenko, Koord.Khim.(Russ.)(Coord.Chem.) (1994), 20, 939                                         |
| YUDFUY   | D.M.Halepoto, L.F.Larkworthy, D.C.Povey, G.W.Smith, V.Ramdas, Polyhedron (1995), 14, 1453                                                                           |
| YUDFUY2  | D.M.Halepoto, L.F.Larkworthy, D.C.Povey, G.W.Smith, V.Ramdas, Polyhedron (1995), 14, 1453                                                                           |
| YURKIF   | J.-U.Vogt, O.Haackel, W.Preetz, Z.Anorg.Allg.Chem. (1995), 621, 1033, doi:10.1002/zaac.19956210623                                                                  |
| ZALNIJ   | Mingyi Wei, R.D.Willett, Inorg.Chem. (1995), 34, 3780, doi:10.1021/ic00118a027                                                                                      |
| ZICWOX   | F.A.Cotton, K.Vidyasagar, Polyhedron (1995), 14, 3077                                                                                                               |
| ZILZID   | P.Laine, A.Gourdon, J.-P.Launay, Inorg.Chem. (1995), 34, 5138                                                                                                       |
| ZIYWAF   | J.H.Reibenspies, K.K.Klausmeyer, D.J.Darensbourg, Z.Kristallogr. (1995), 210, 882                                                                                   |
| ZOKHEM   | R.D.Gillard, D.E.Hibbs, C.Holland, M.B.Hursthouse, K.M.A.Malik, G.Sykara, Polyhedron (1996), 15, 225, doi:10.1016/0277-5387(95)00248-Q                              |
| ZOLKEQ   | D.J.Darensbourg, K.K.Klausmeyer, J.H.Reibenspies, Inorg.Chem. (1995), 34, 4933, doi:10.1021/ic00124a002                                                             |
| ZOTYAI   | F.Weller, H.-J.Mai, K.Dehnicke, Z.Naturforsch.,B:Chem.Sci. (1996), 51, 298                                                                                          |
| ZOTYAI2  | F.Weller, H.-J.Mai, K.Dehnicke, Z.Naturforsch.,B:Chem.Sci. (1996), 51, 298                                                                                          |
| ZZZCCG10 | T.Lis, J.Matuszewski, Acta Crystallogr.,Sect.B:Struct.Crystallogr.Cryst.Chem. (1980), 36, 1938, doi:10.1107/S0567740880007558                                       |
